# Supplementary material for: Iridium-catalyzed asymmetric allylation of sodium triisopropylsilanethiolate: A new way to form chiral thiols
Source: Royal Society of Chemistry journal article supplement (doi:10.1039/c1ob06332d), 2011-01-01
Supplement: c1ob06332d.pdf [file c1ob06332d.pdf]

## Electronic Supplementary Information

### **Iridium-Catalyzed Asymmetric Allylation of Sodium Triisopropylsilanethiolate: a New Way to Form Chiral Thiols**

Weiqing Huang<sup>a</sup>, Shengcai Zheng<sup>a</sup>, Jialiang Tang<sup>a</sup>, and Xiaoming Zhao<sup>a\*</sup>

*a Department of Chemistry, Tongji University, 1239 Siping Road, Shanghai, 200092 P.R. China*

*b State Key Laboratory of Fine Chemicals, Dalian University of Technology, 158 Zhongshan Road,  
Dalian, P.R. China, 116012*

*xmzhao08@mail.tongji.edu.cn*

### NMR Spectra of the Compounds:

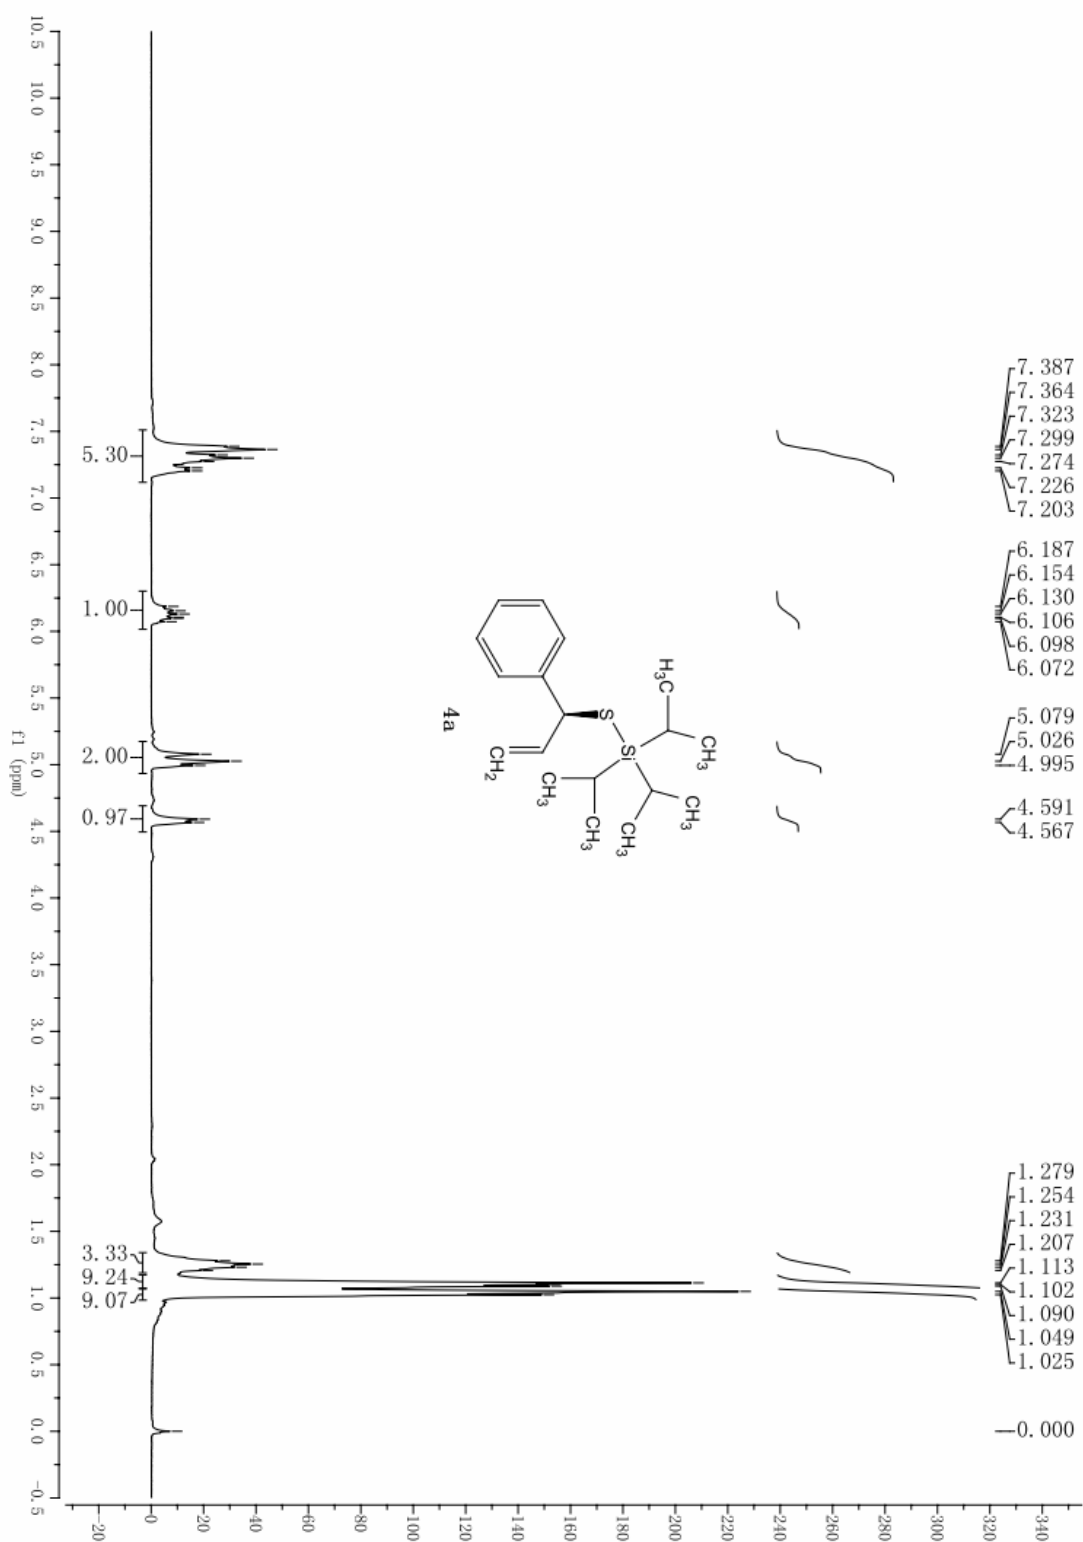

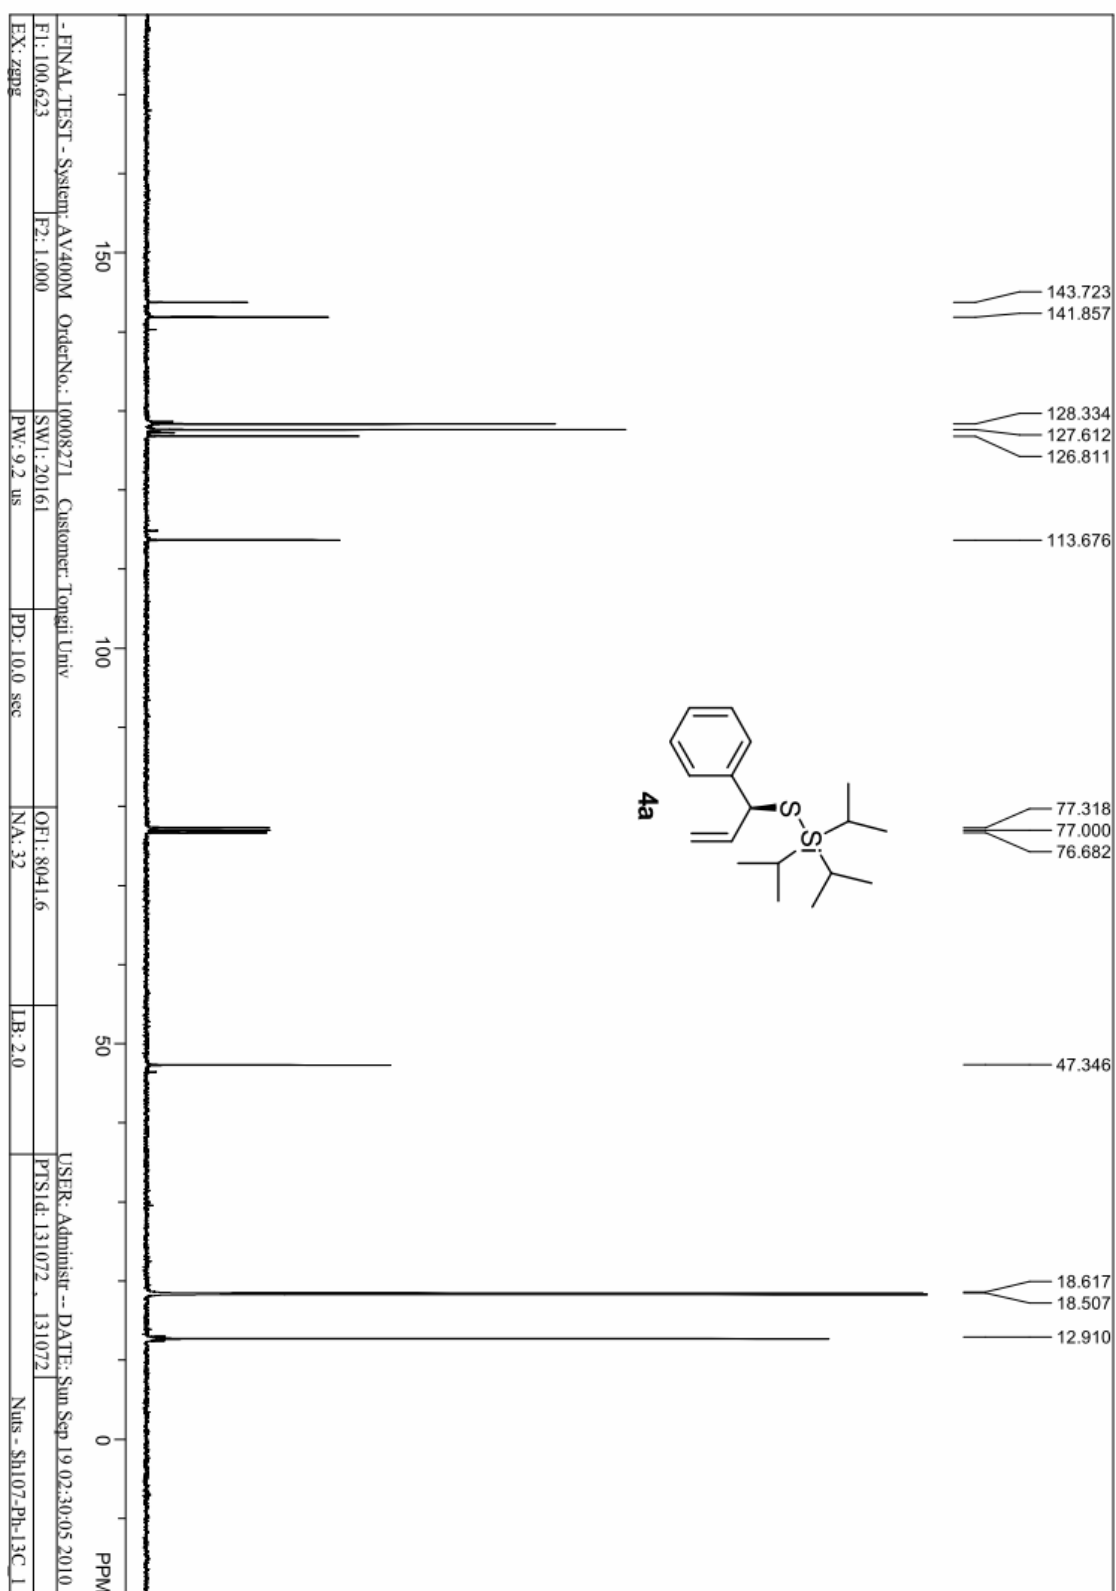

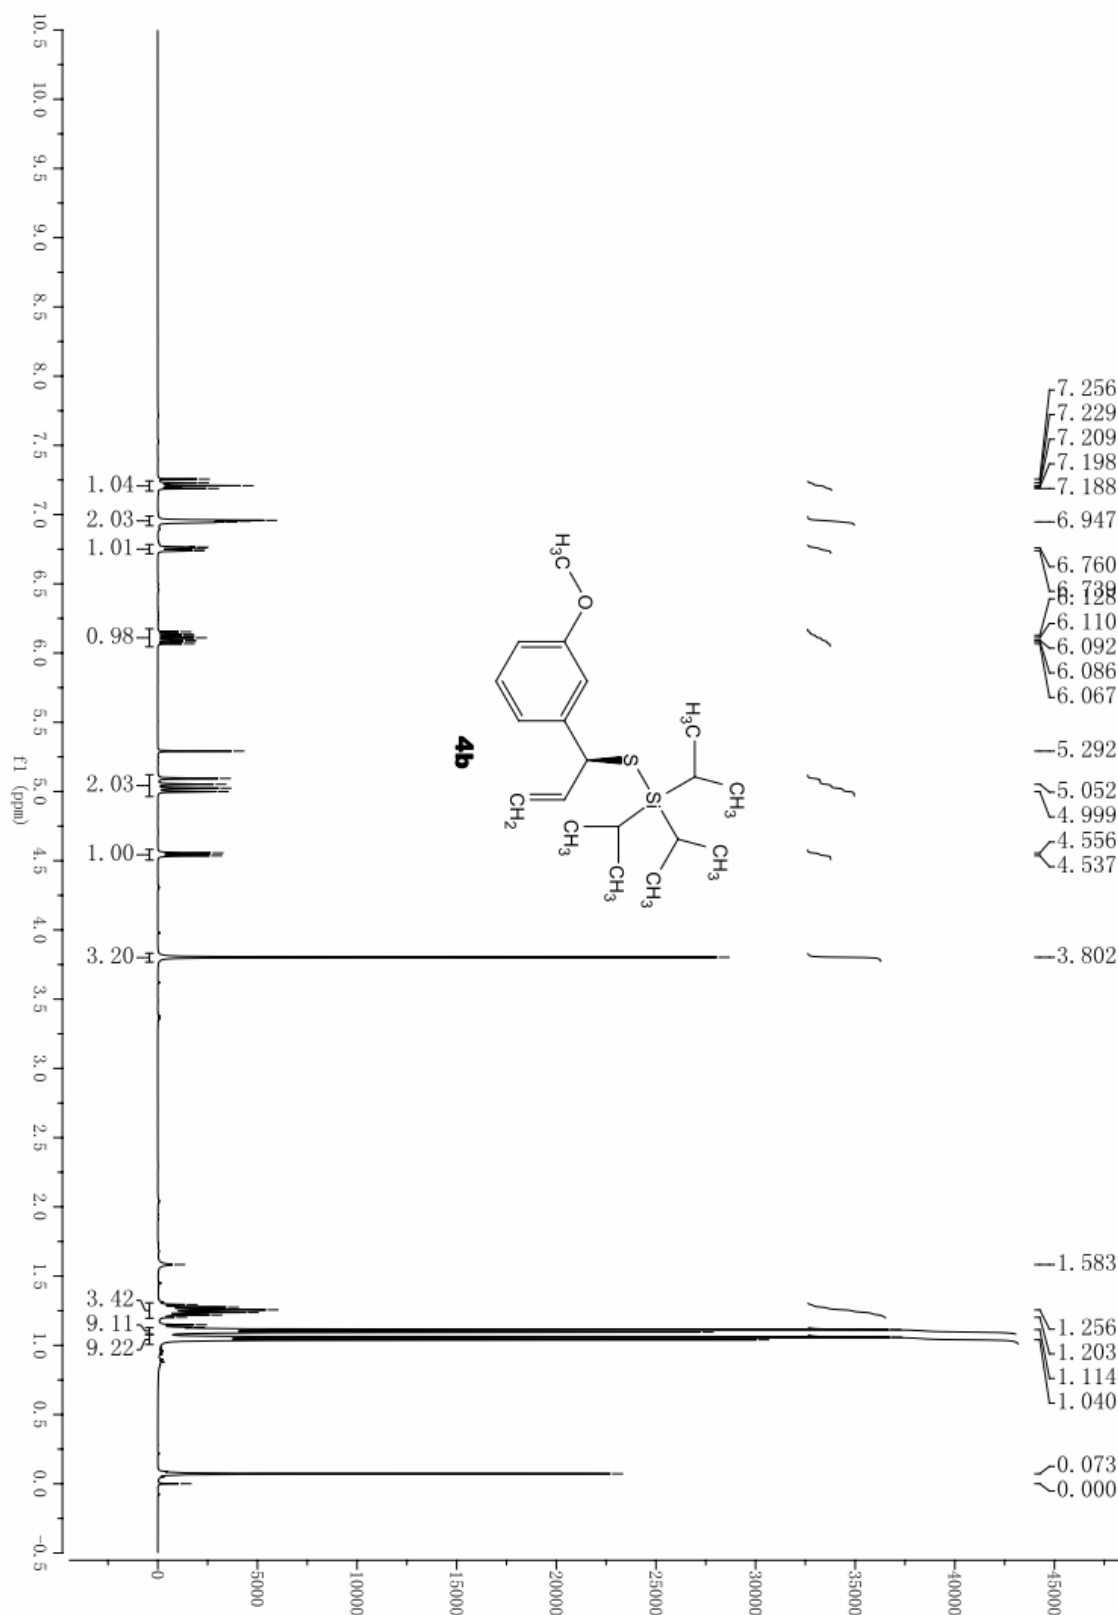

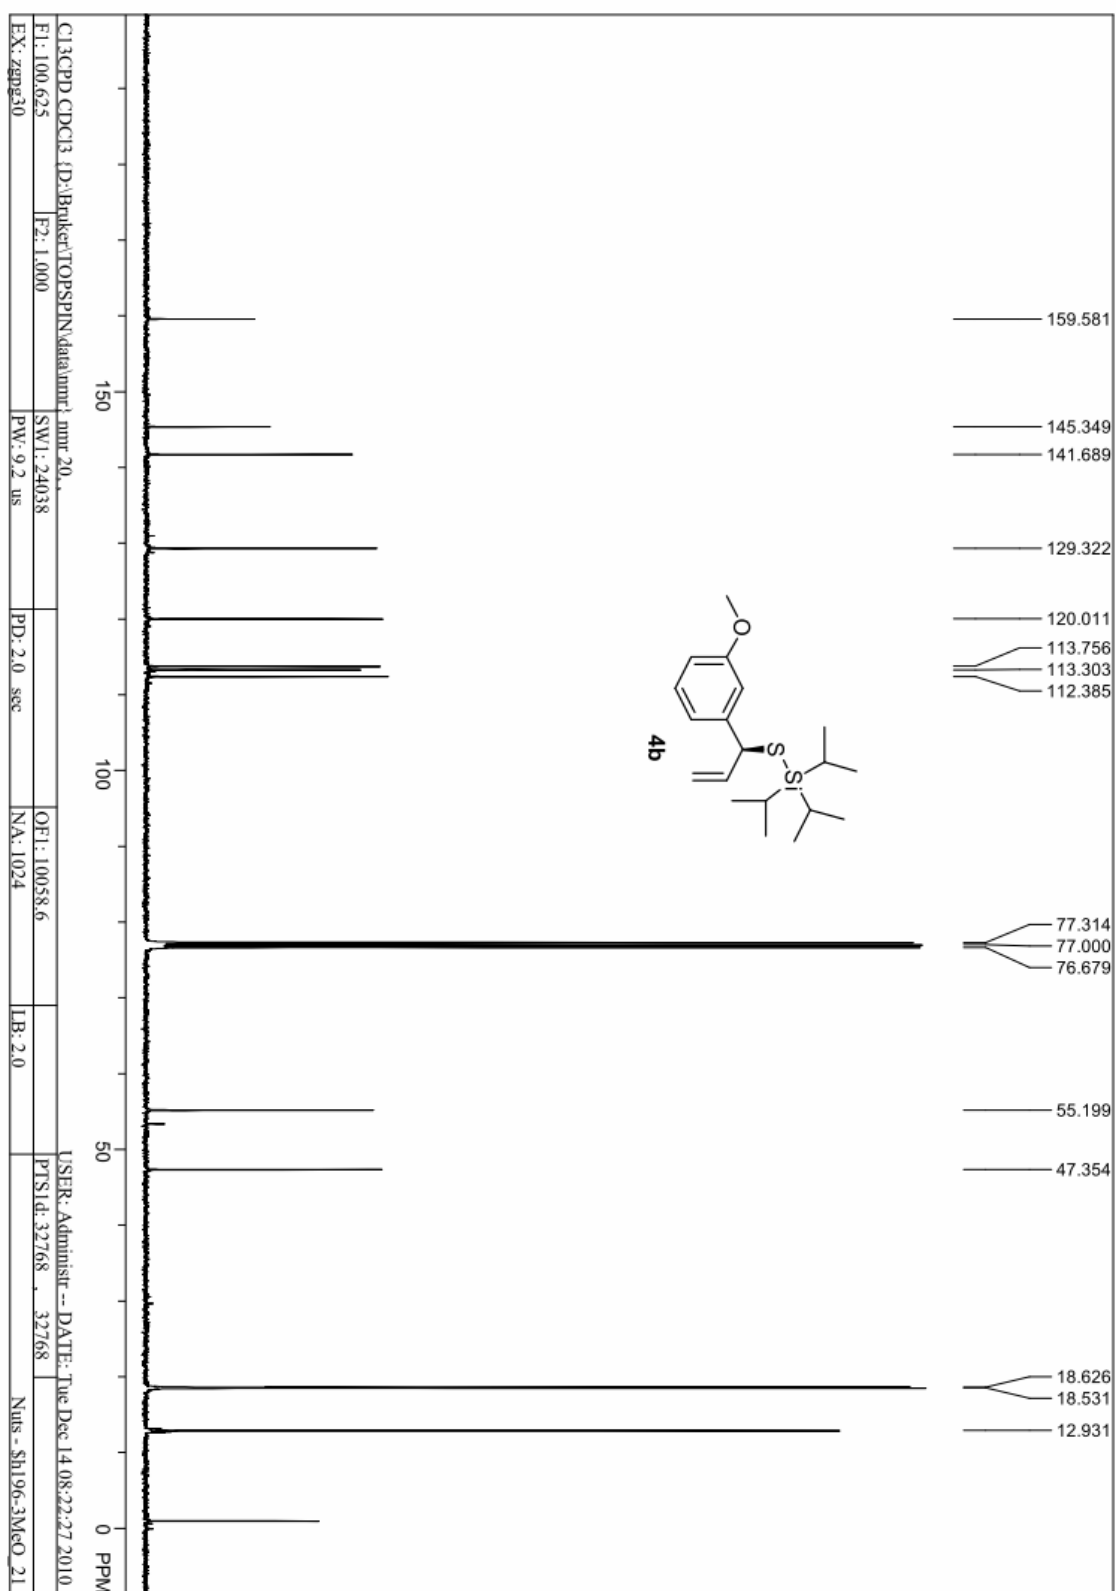

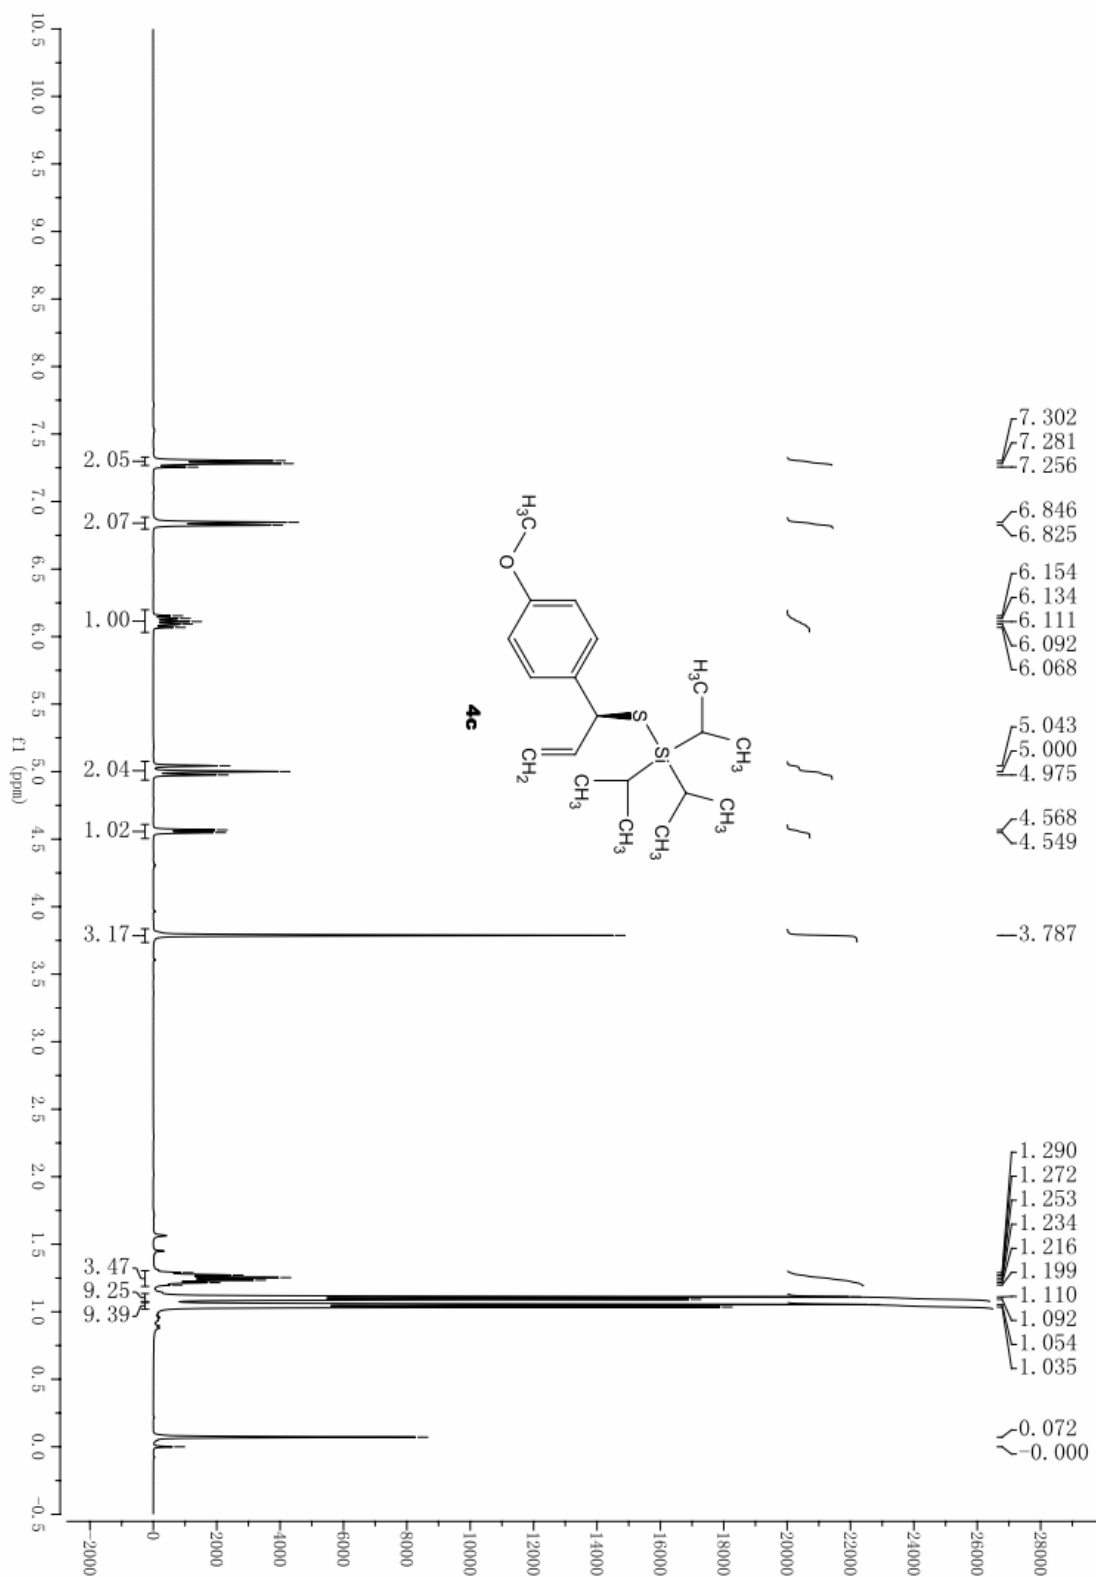

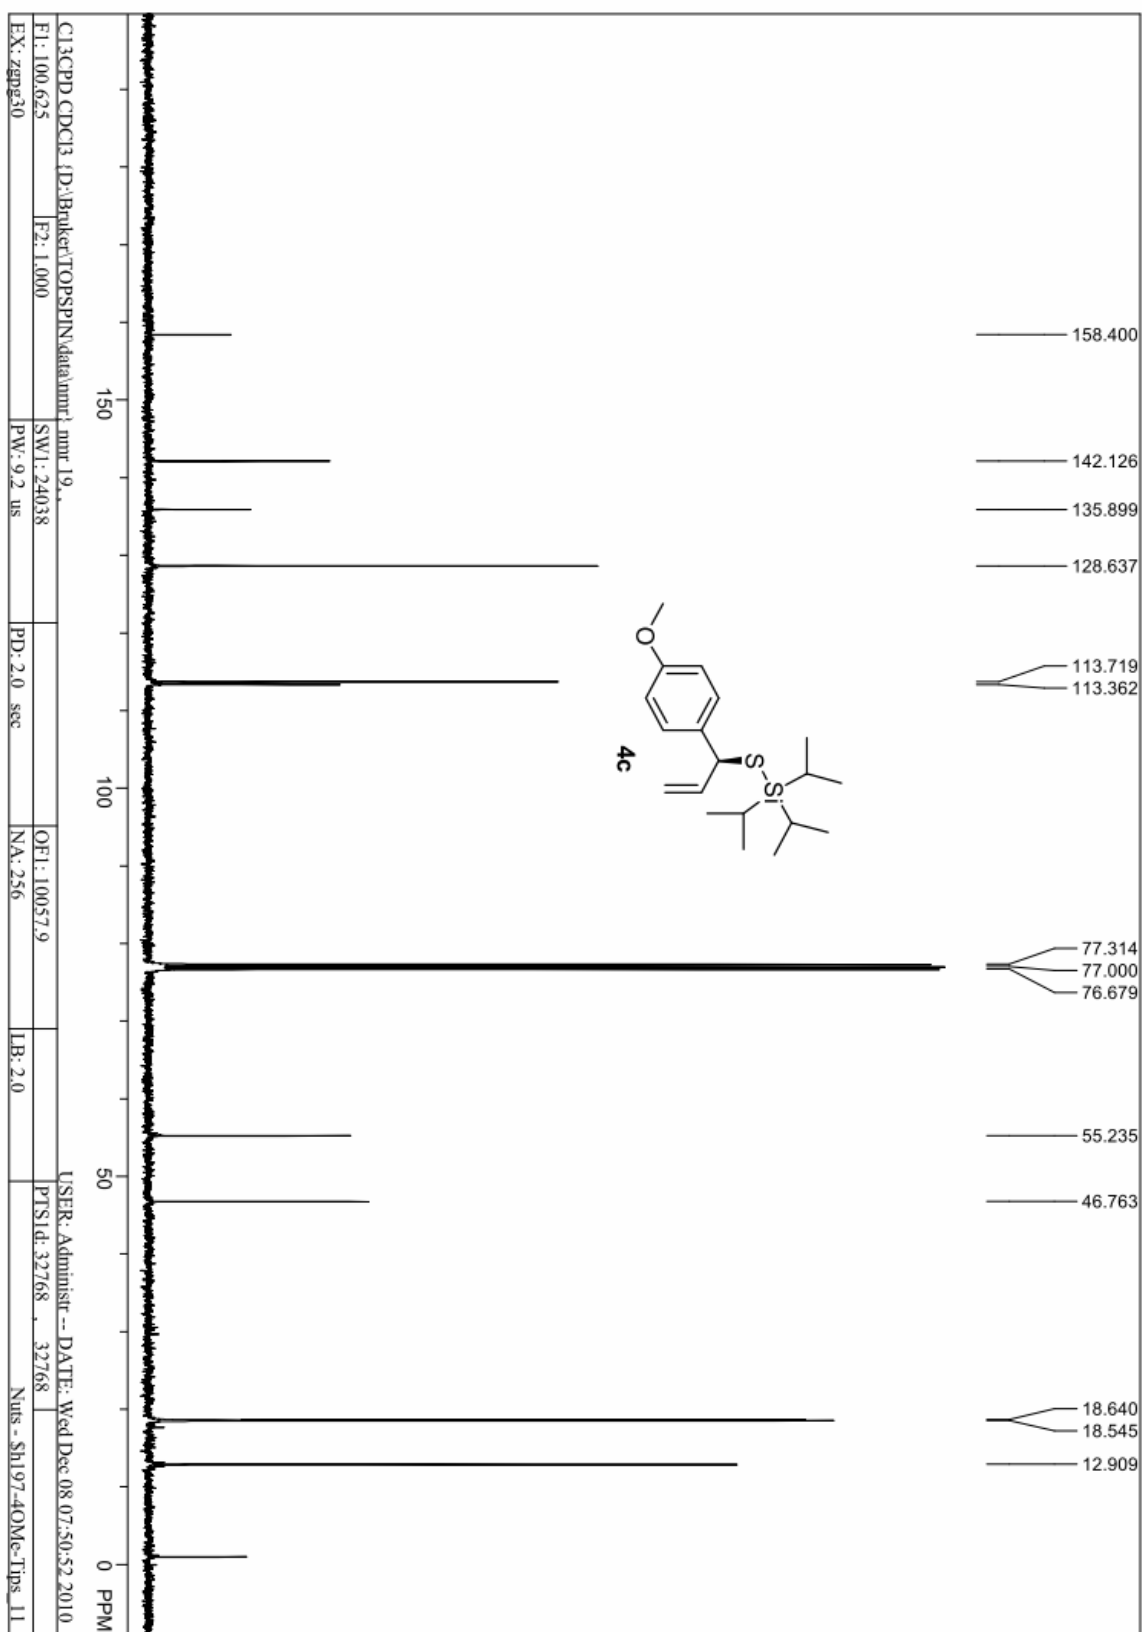

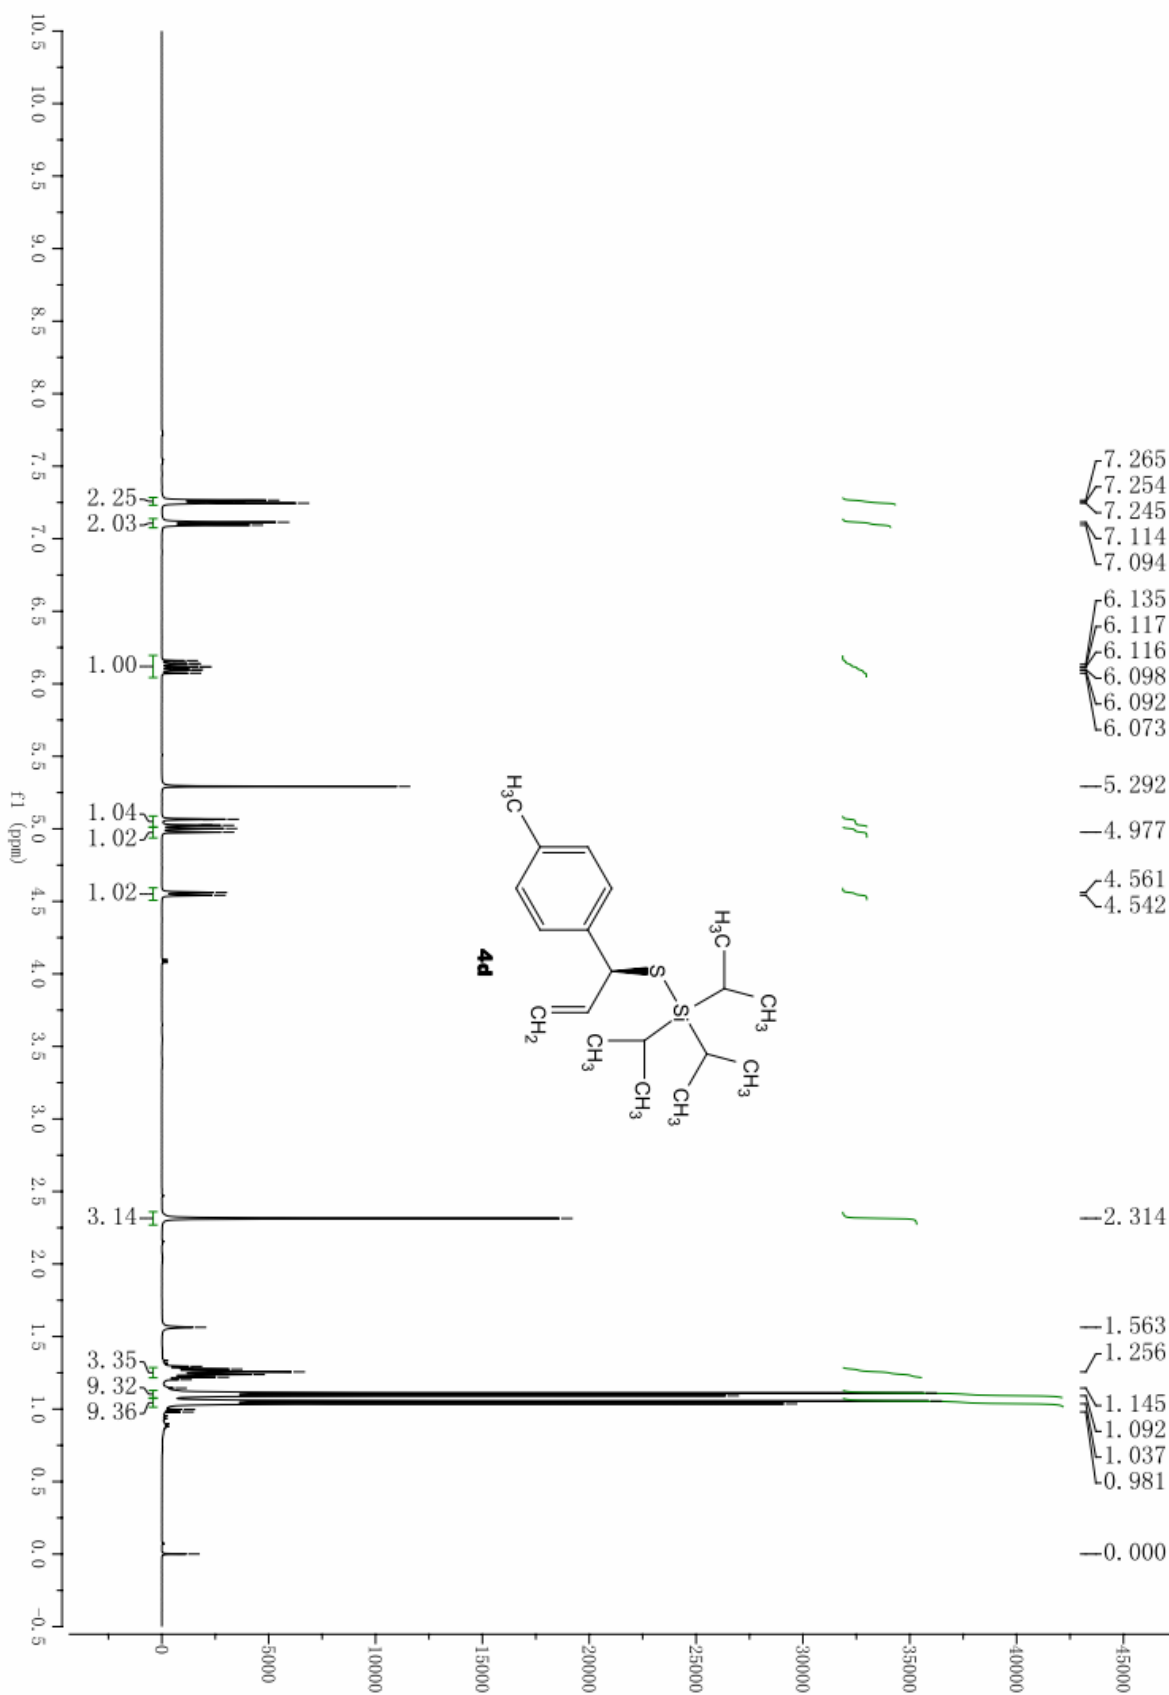



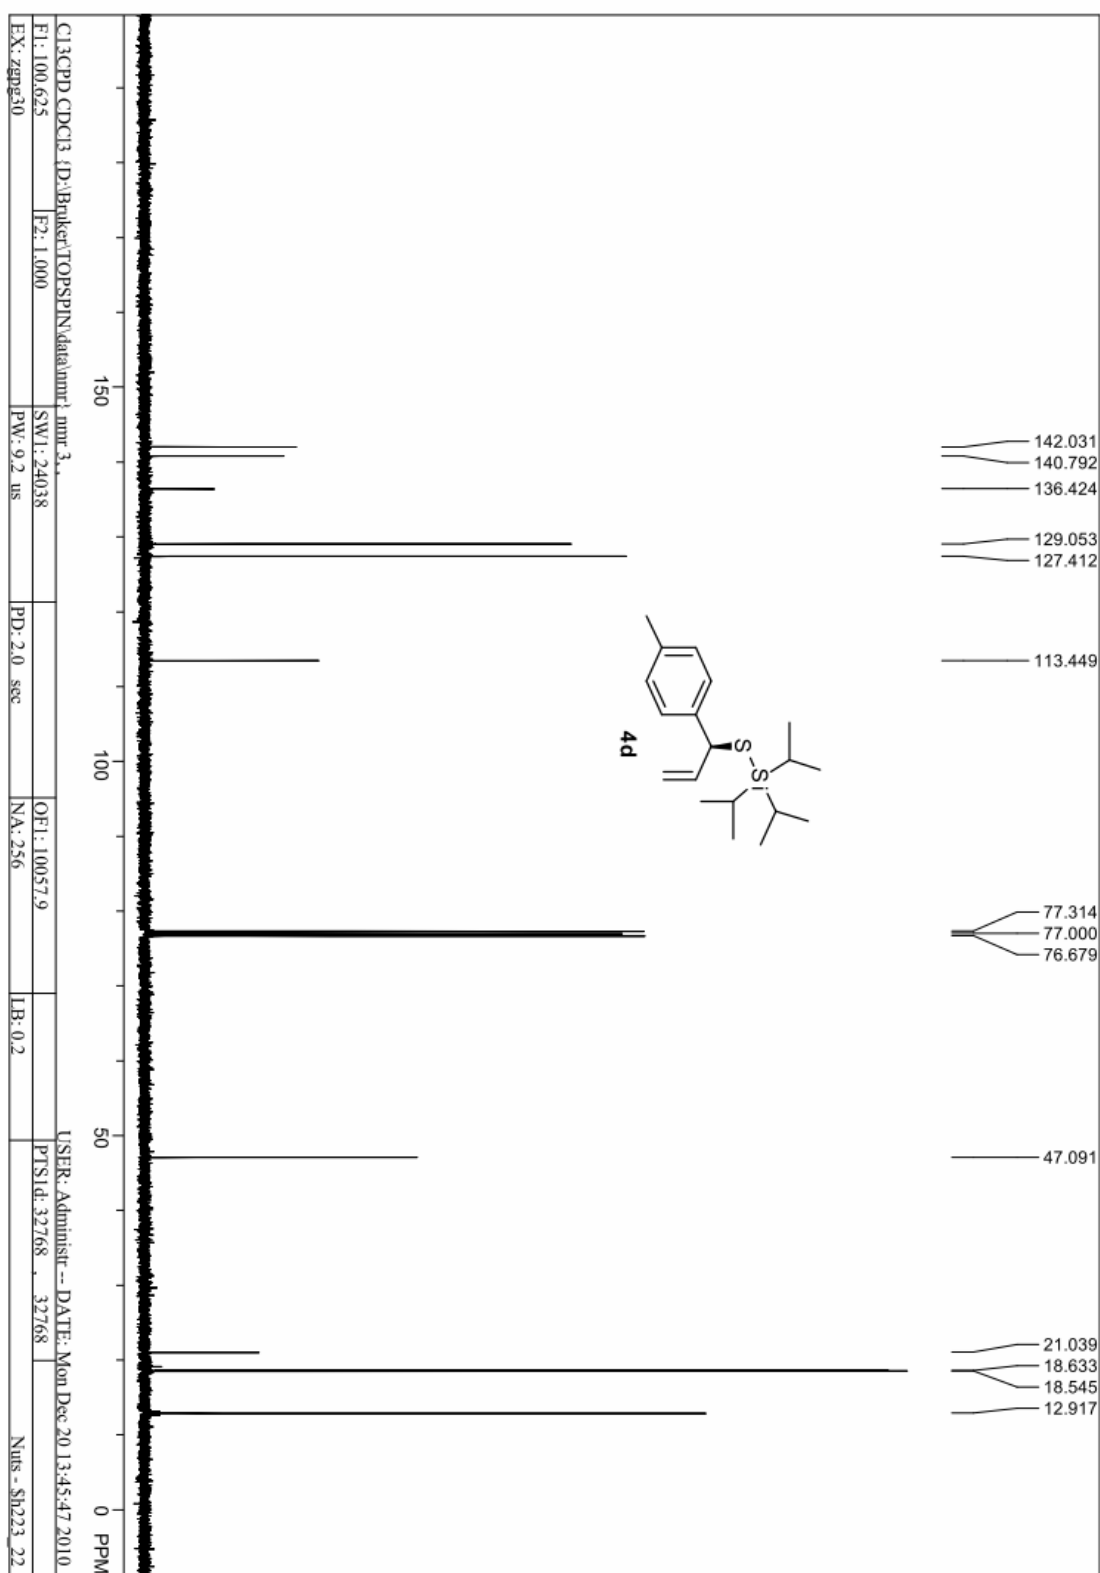

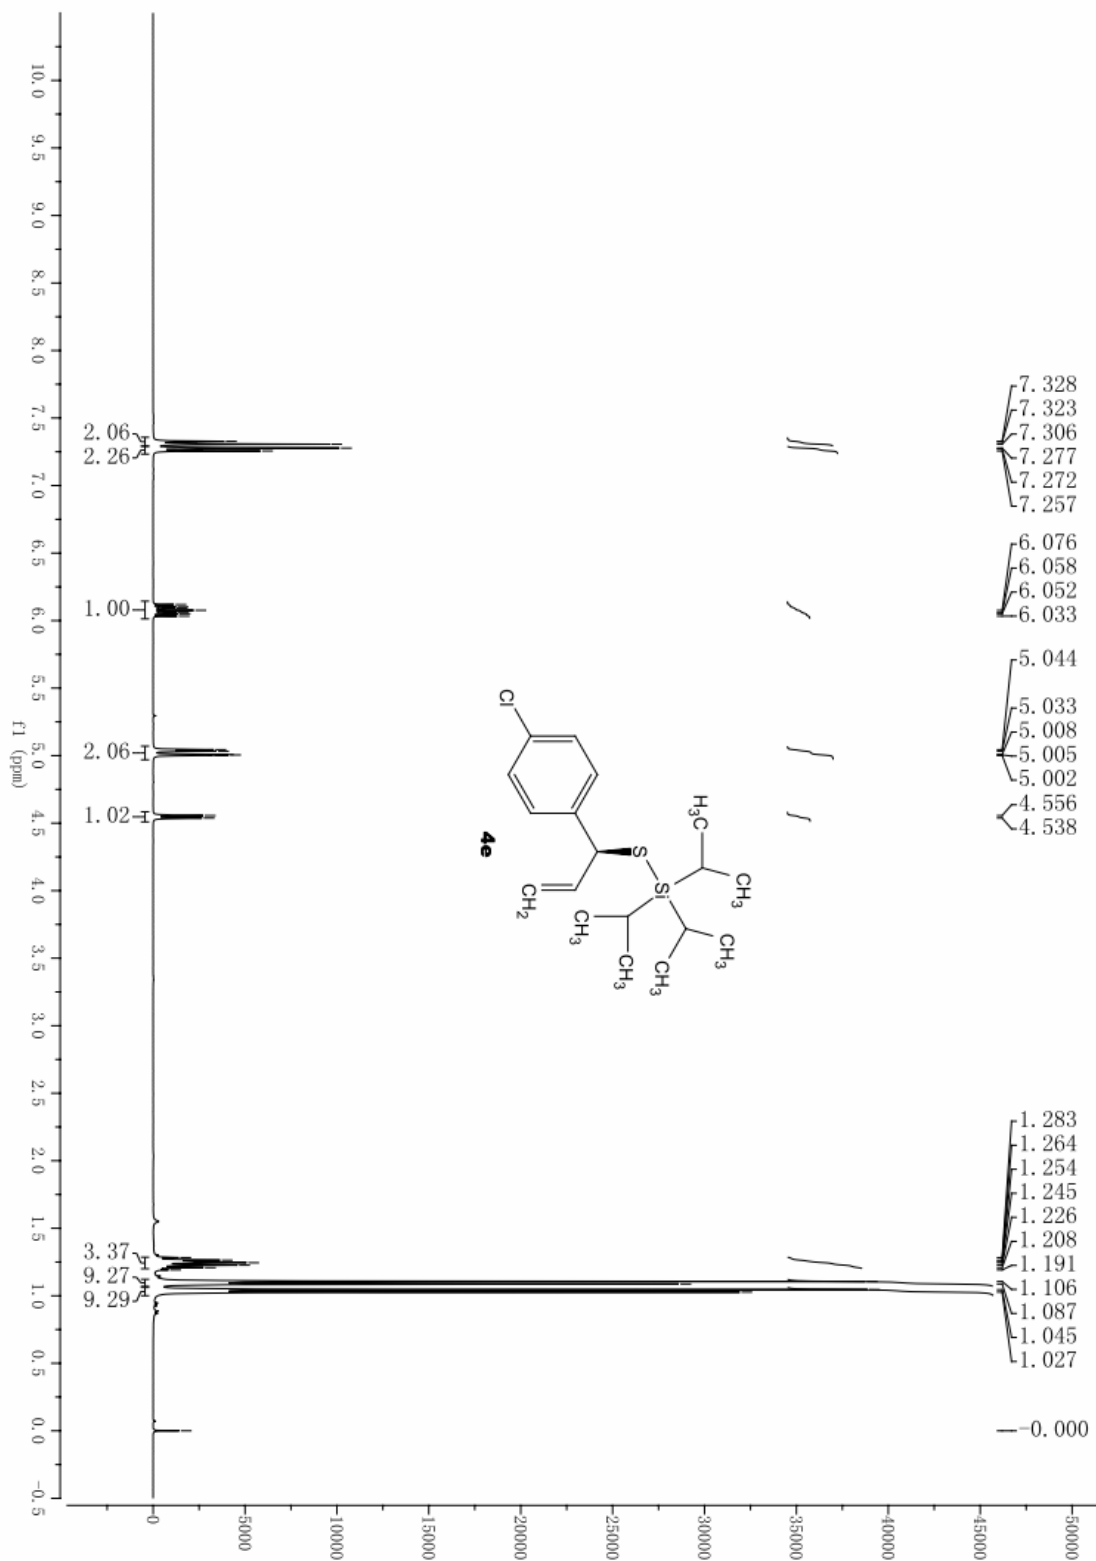

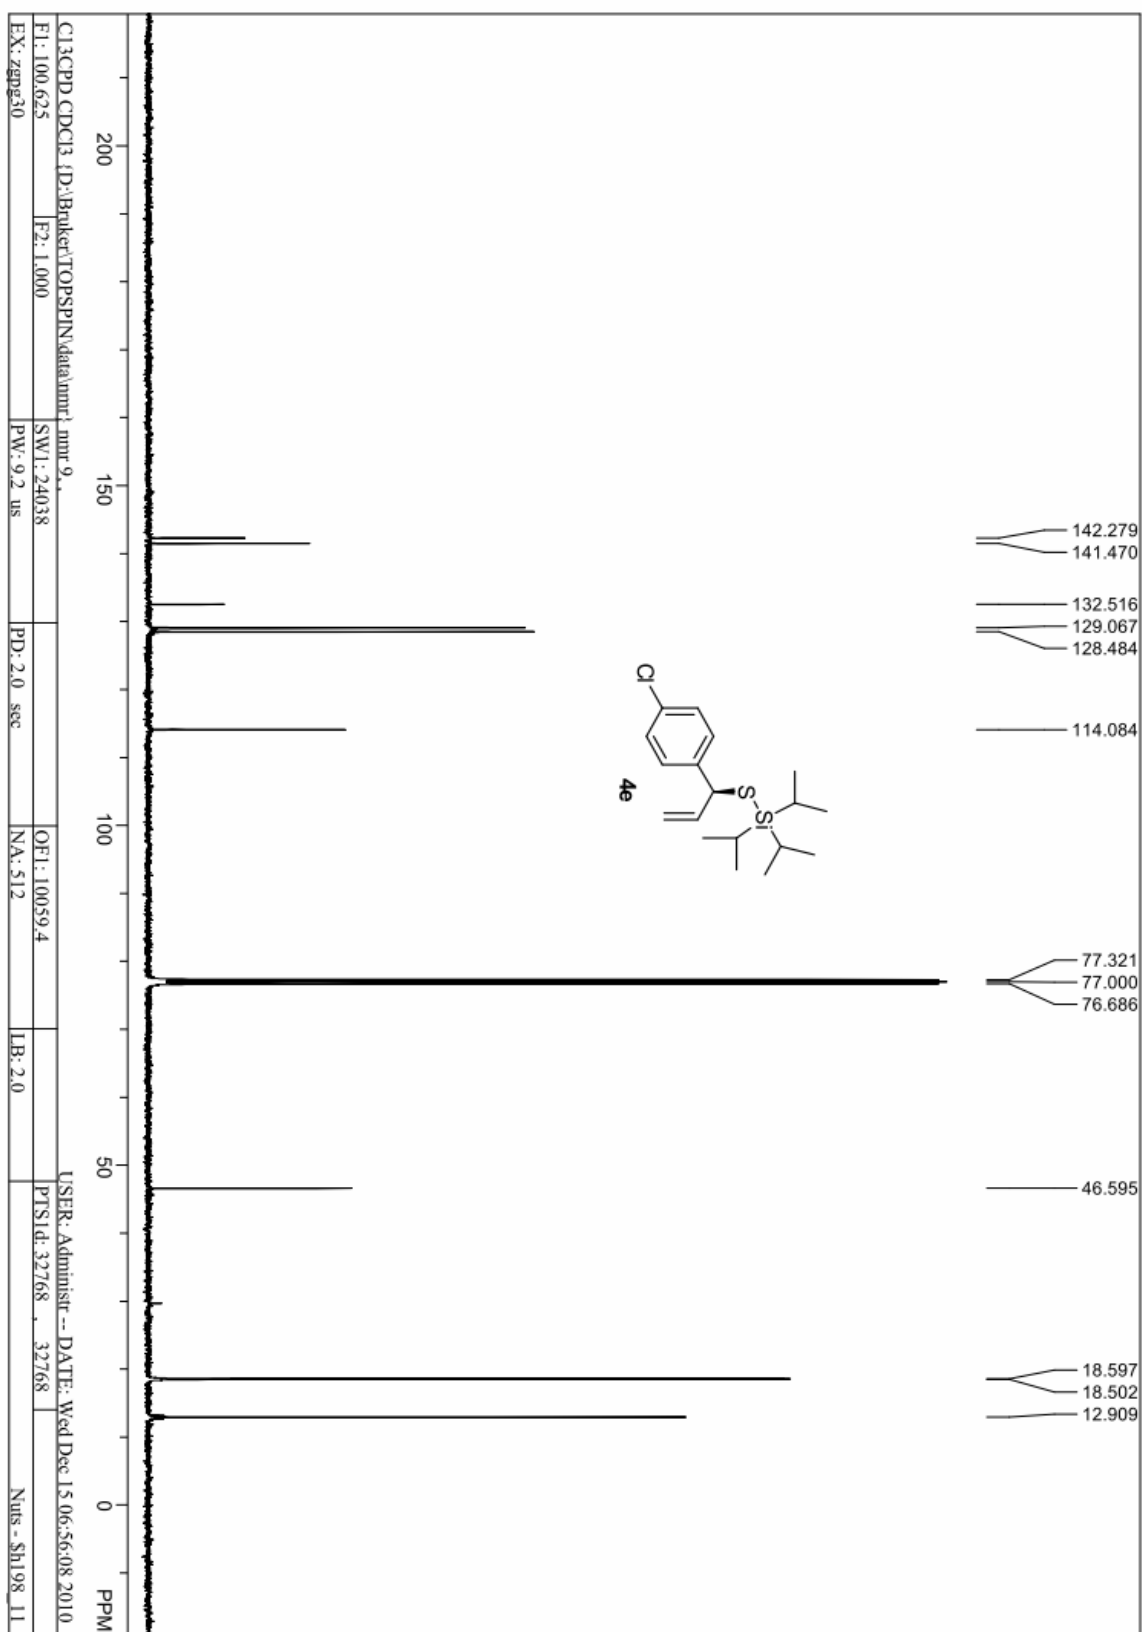

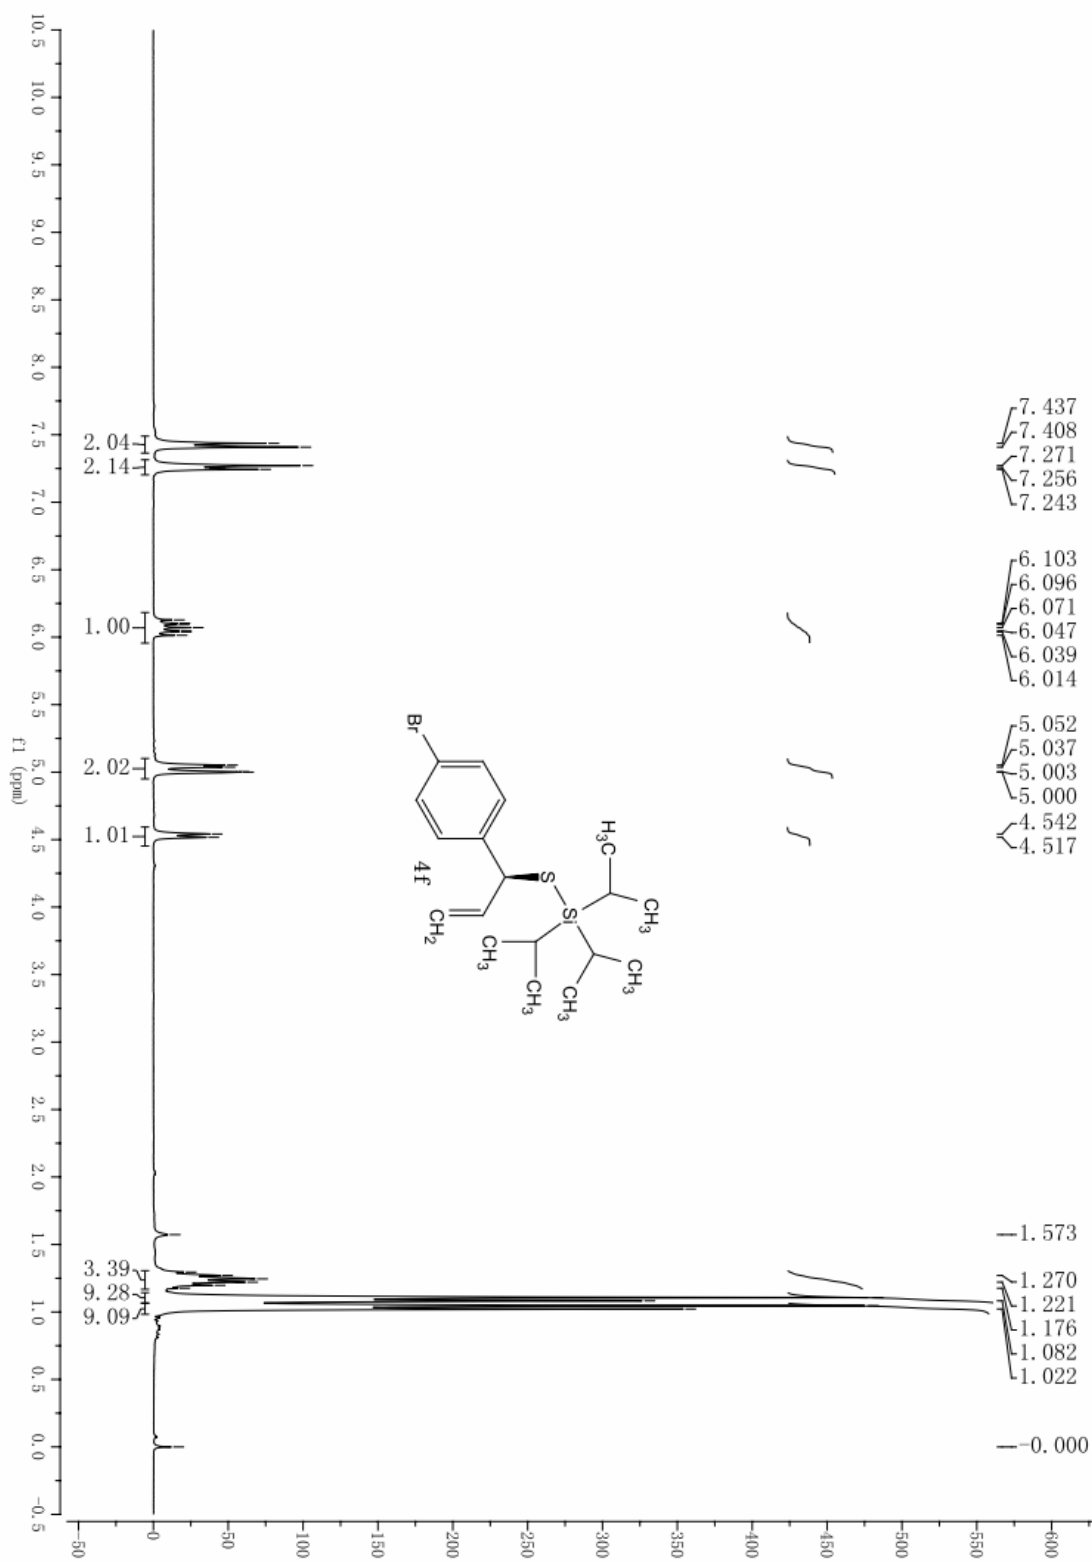

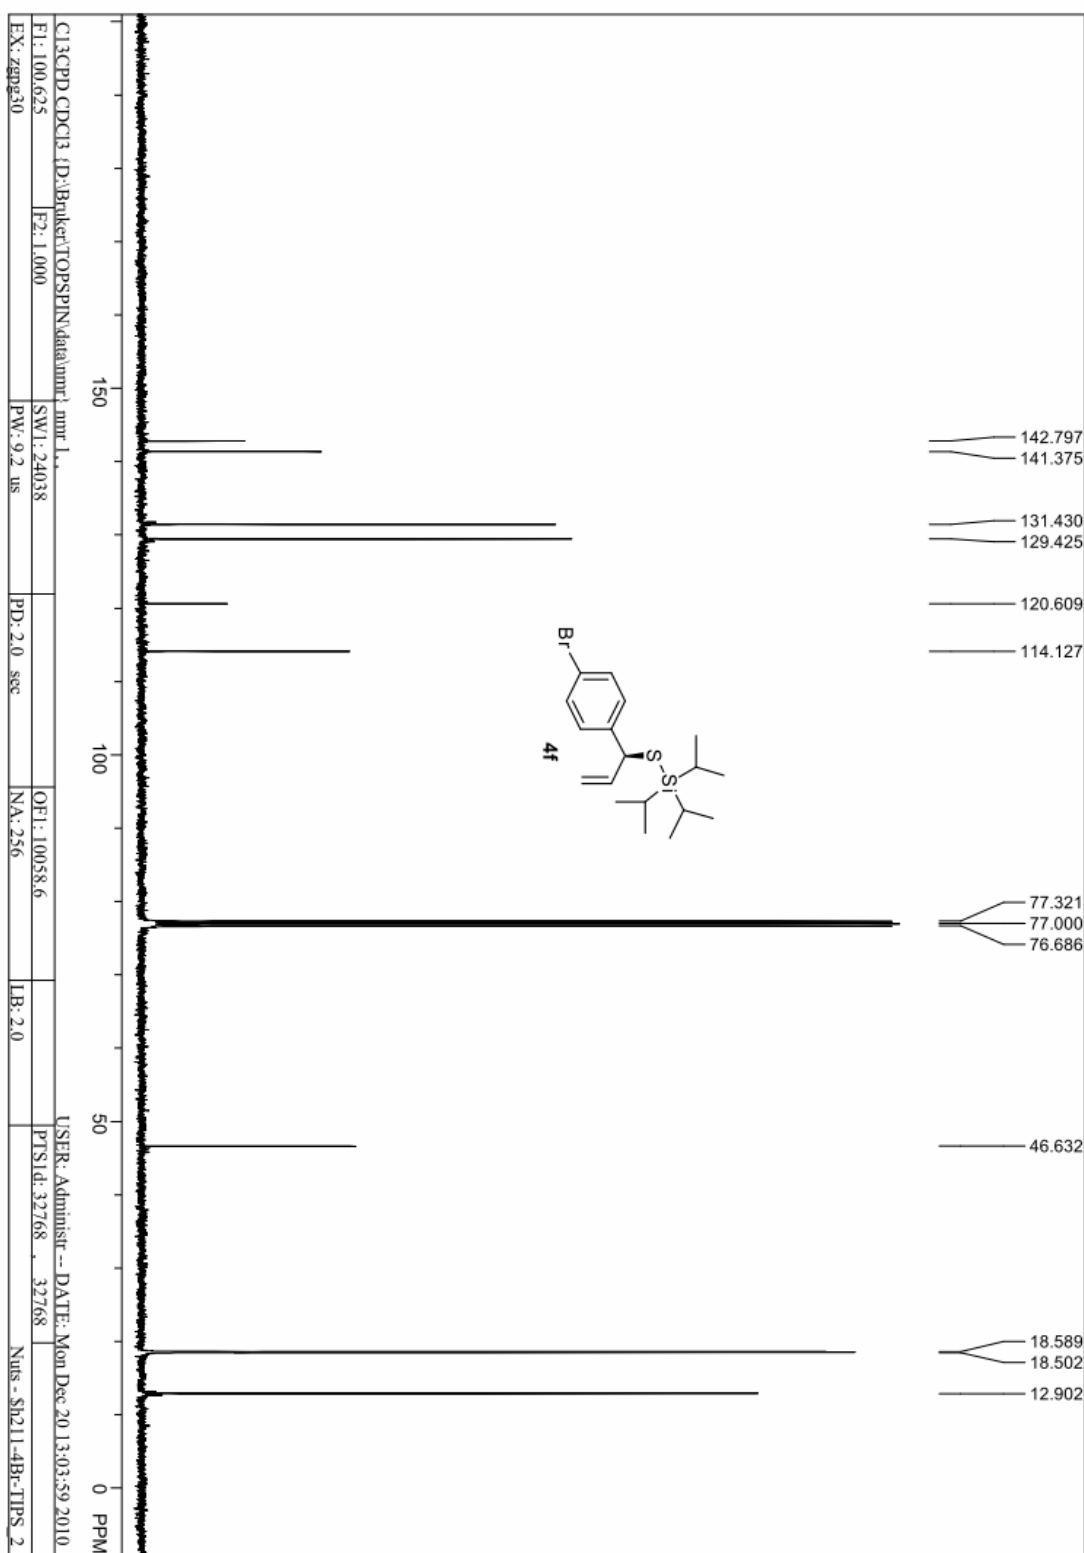

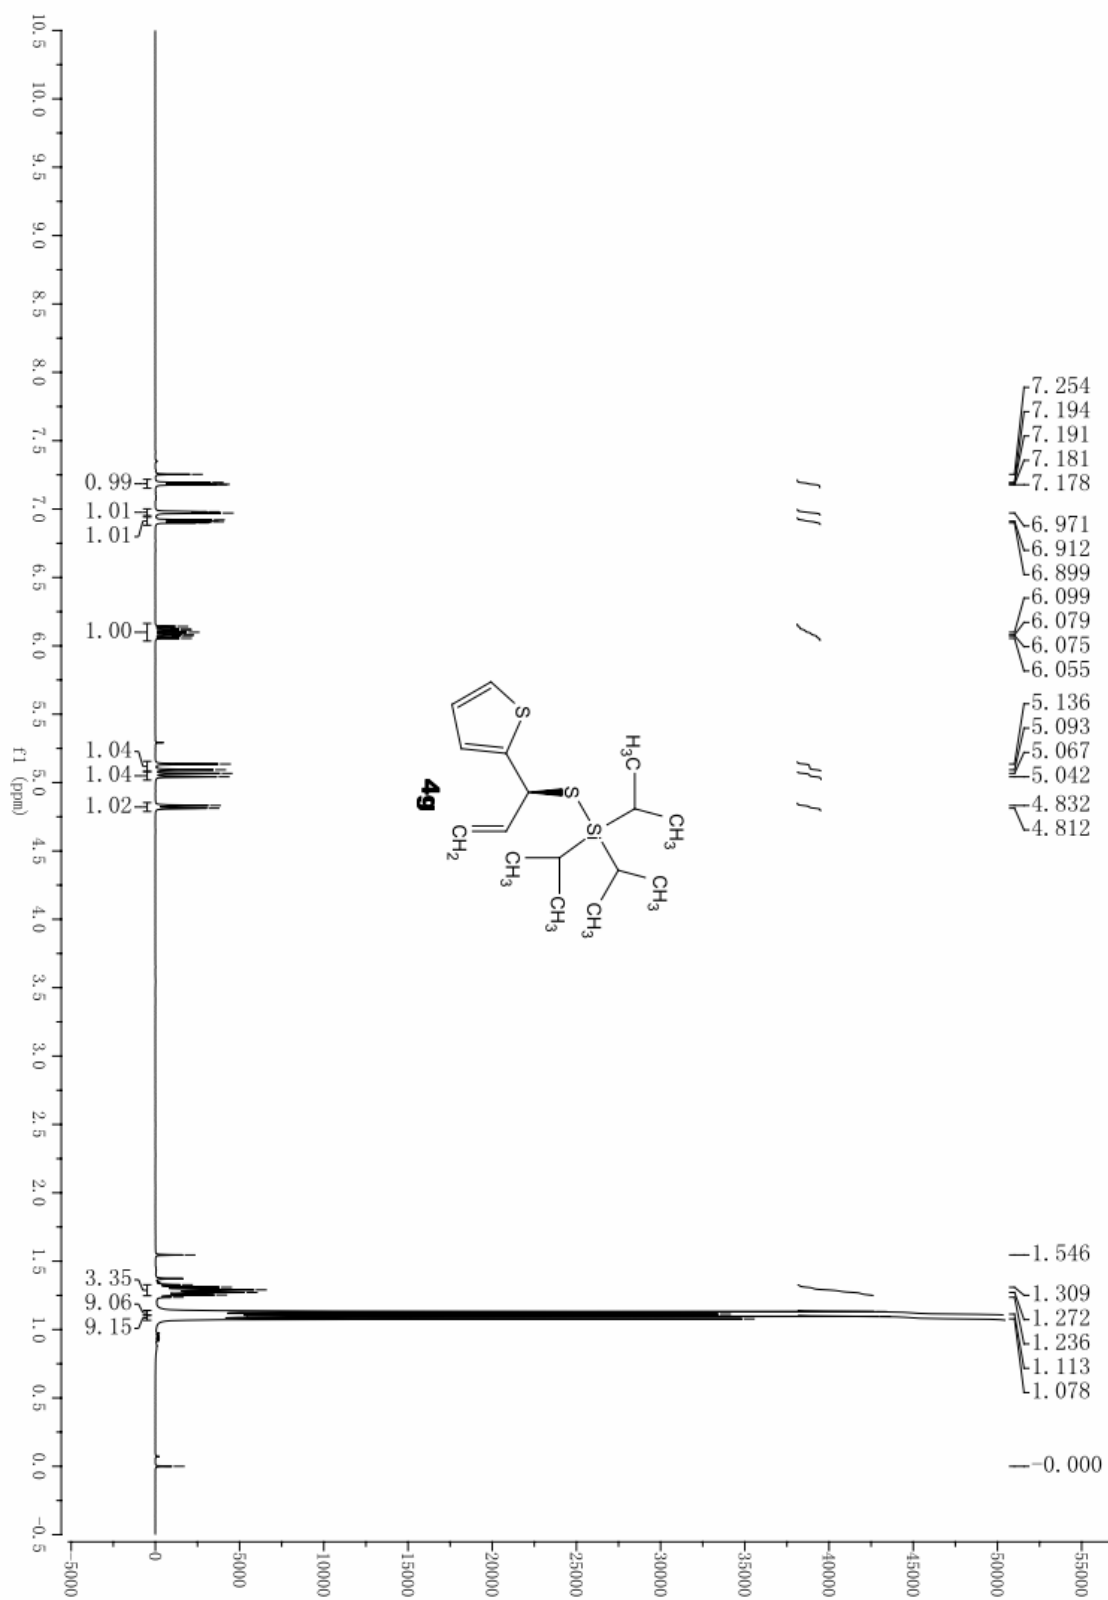

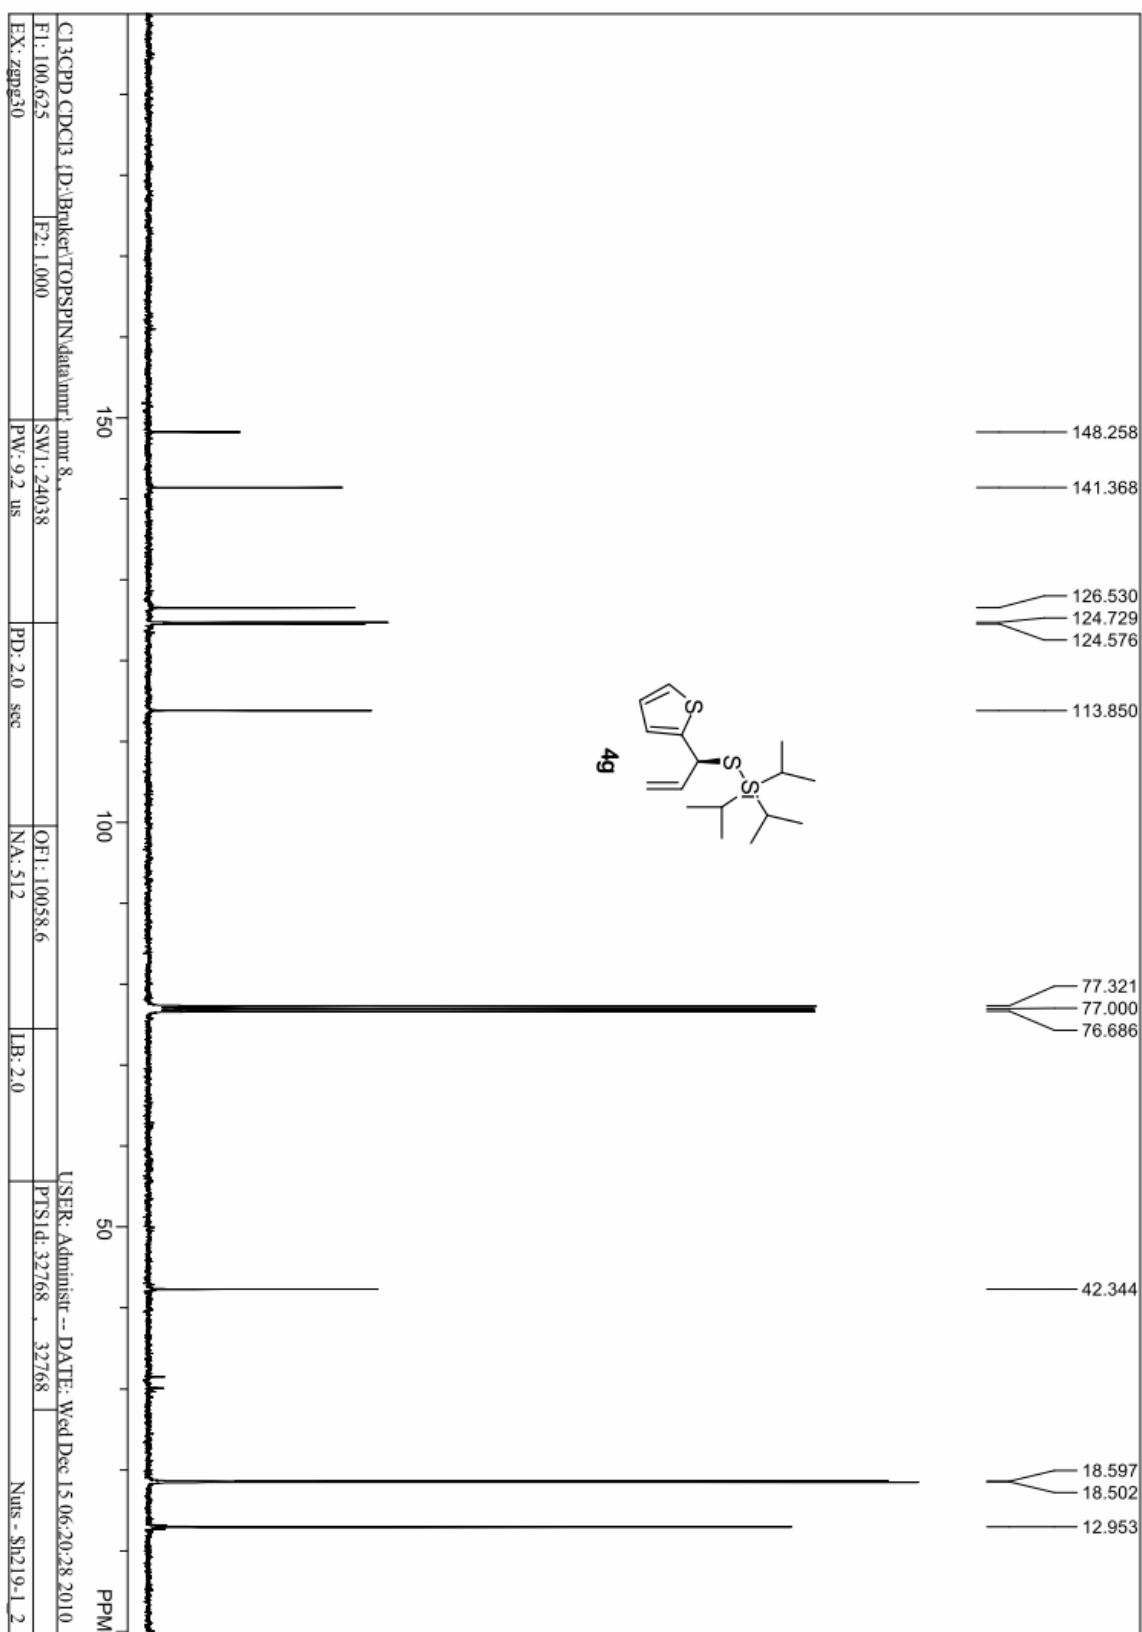

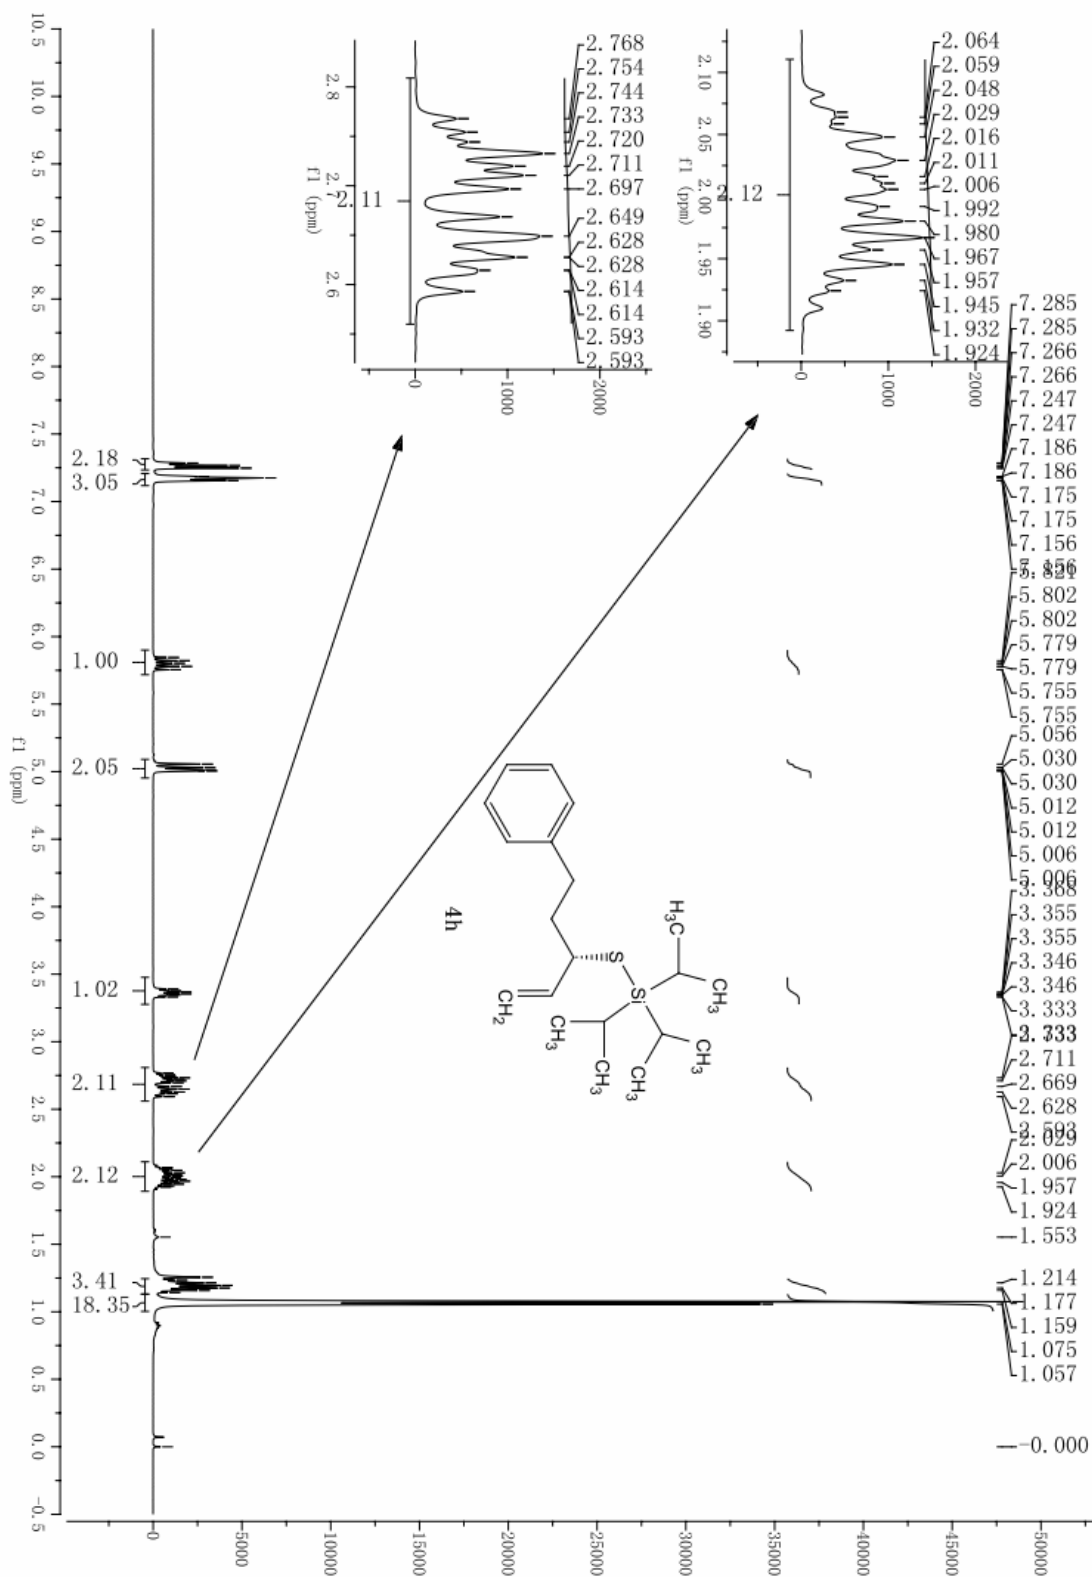



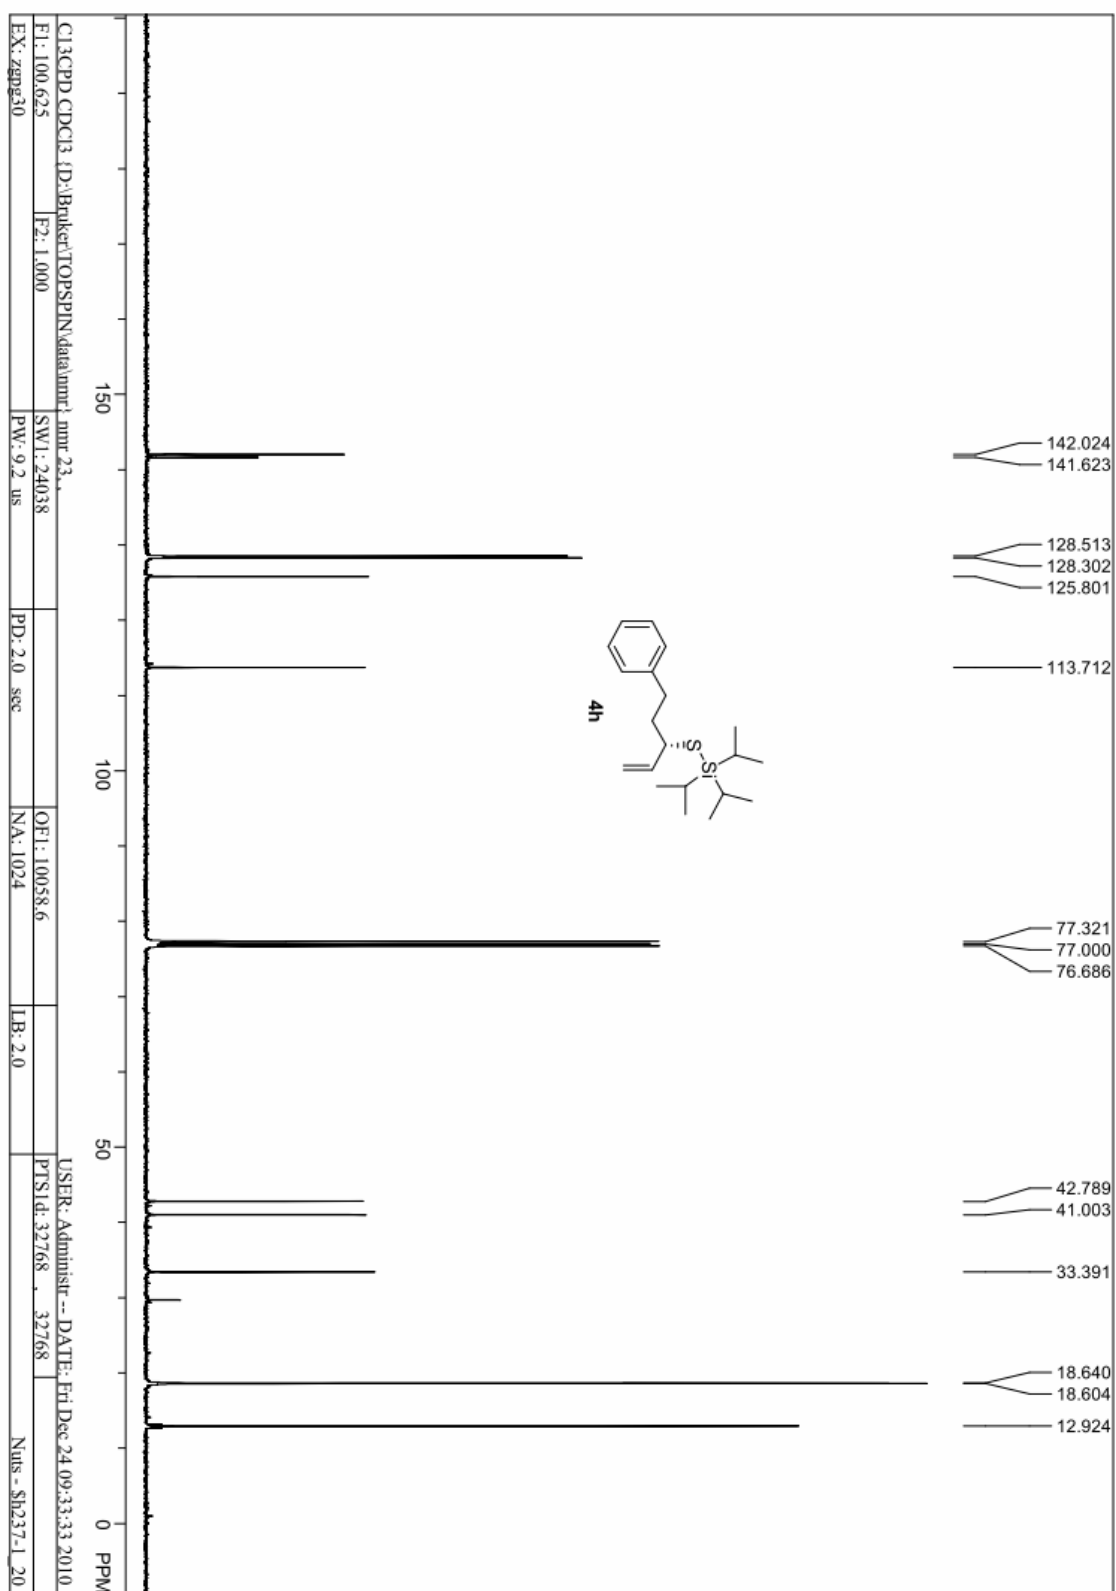

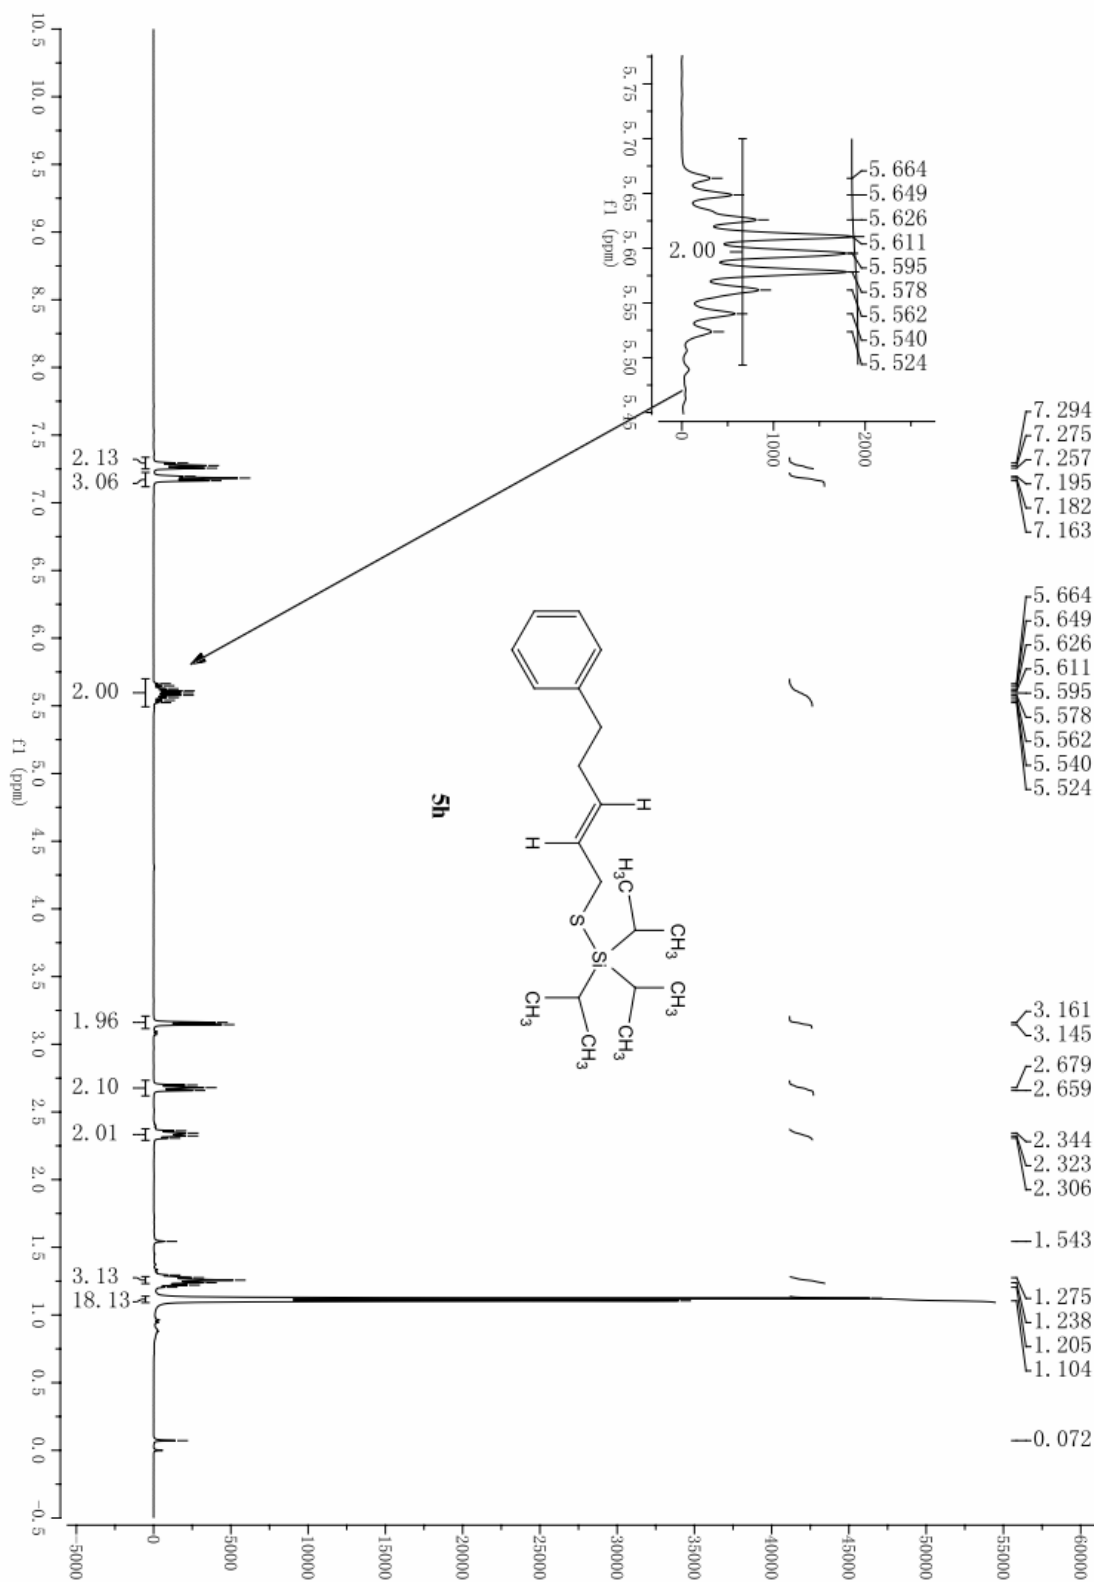

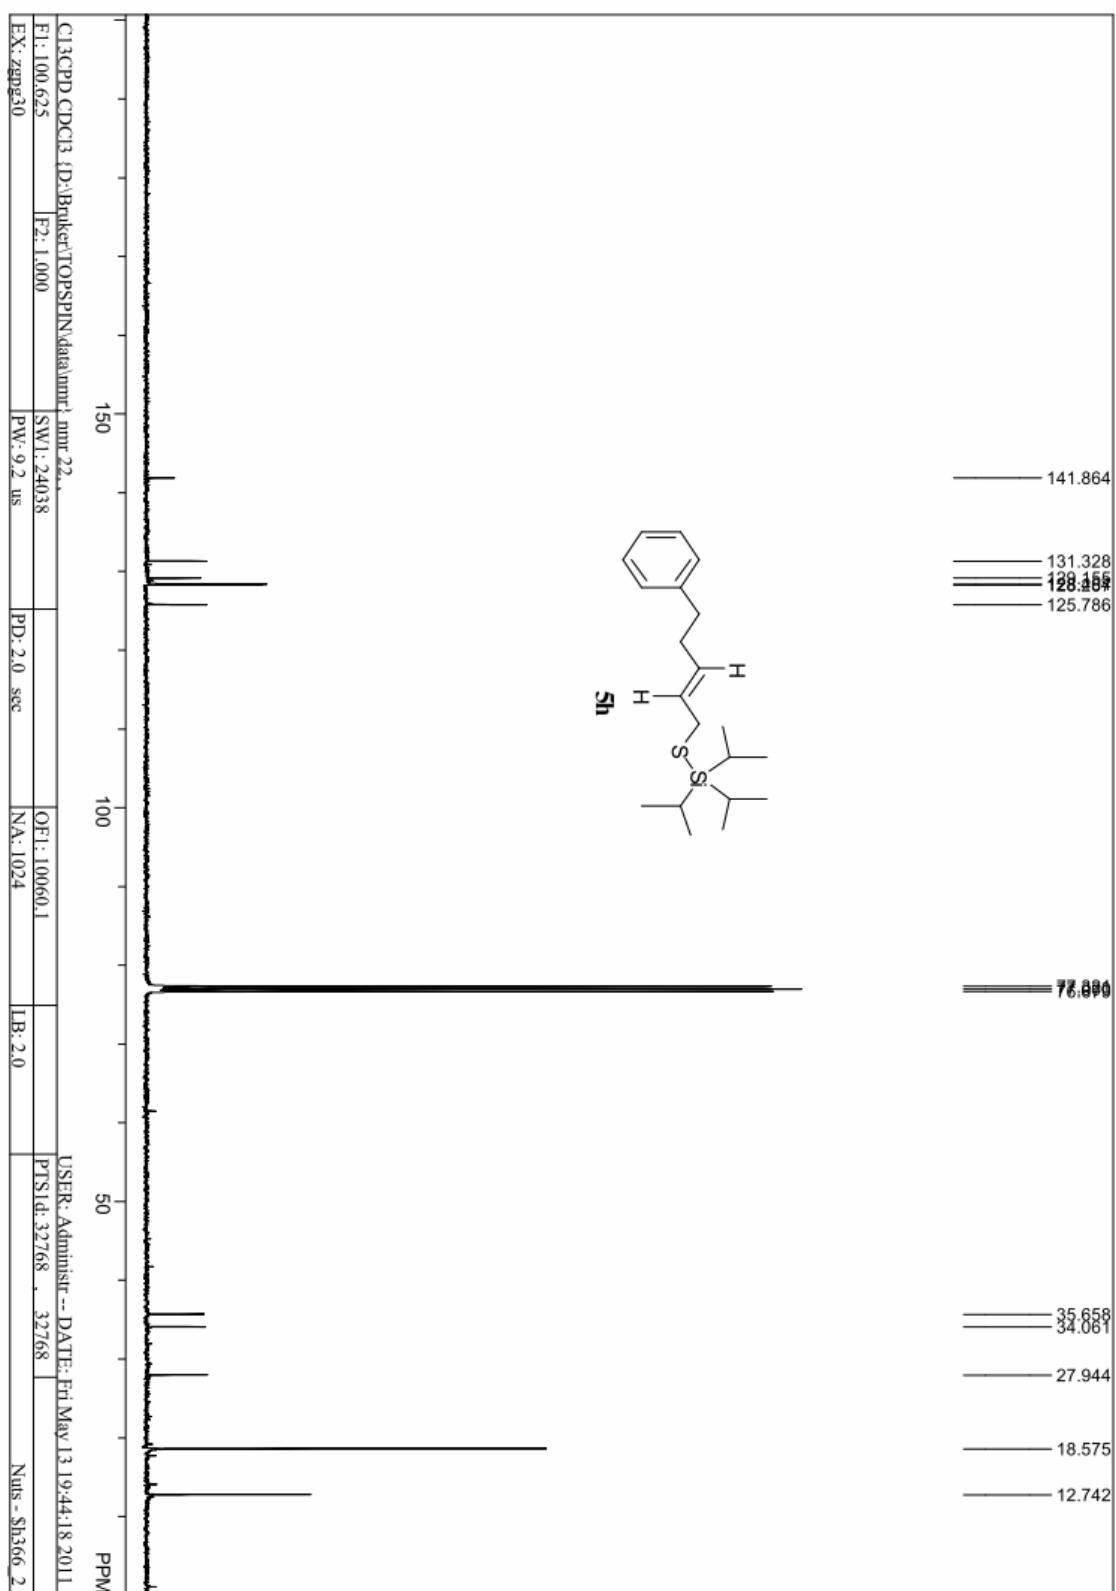

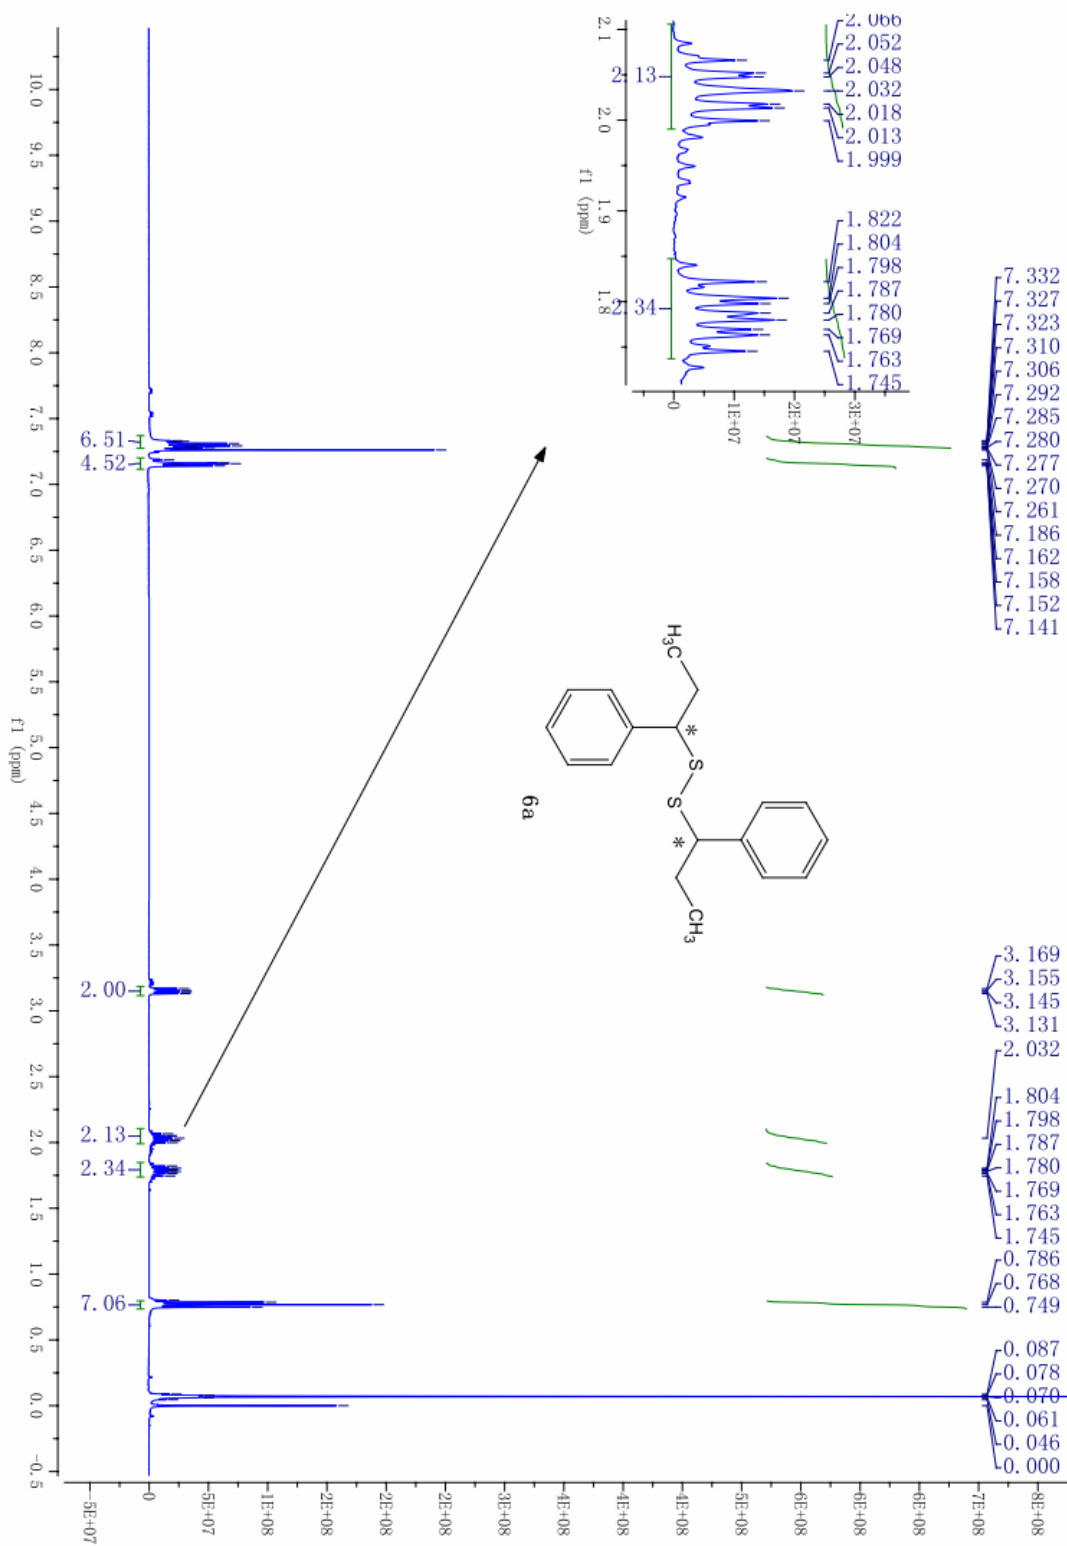

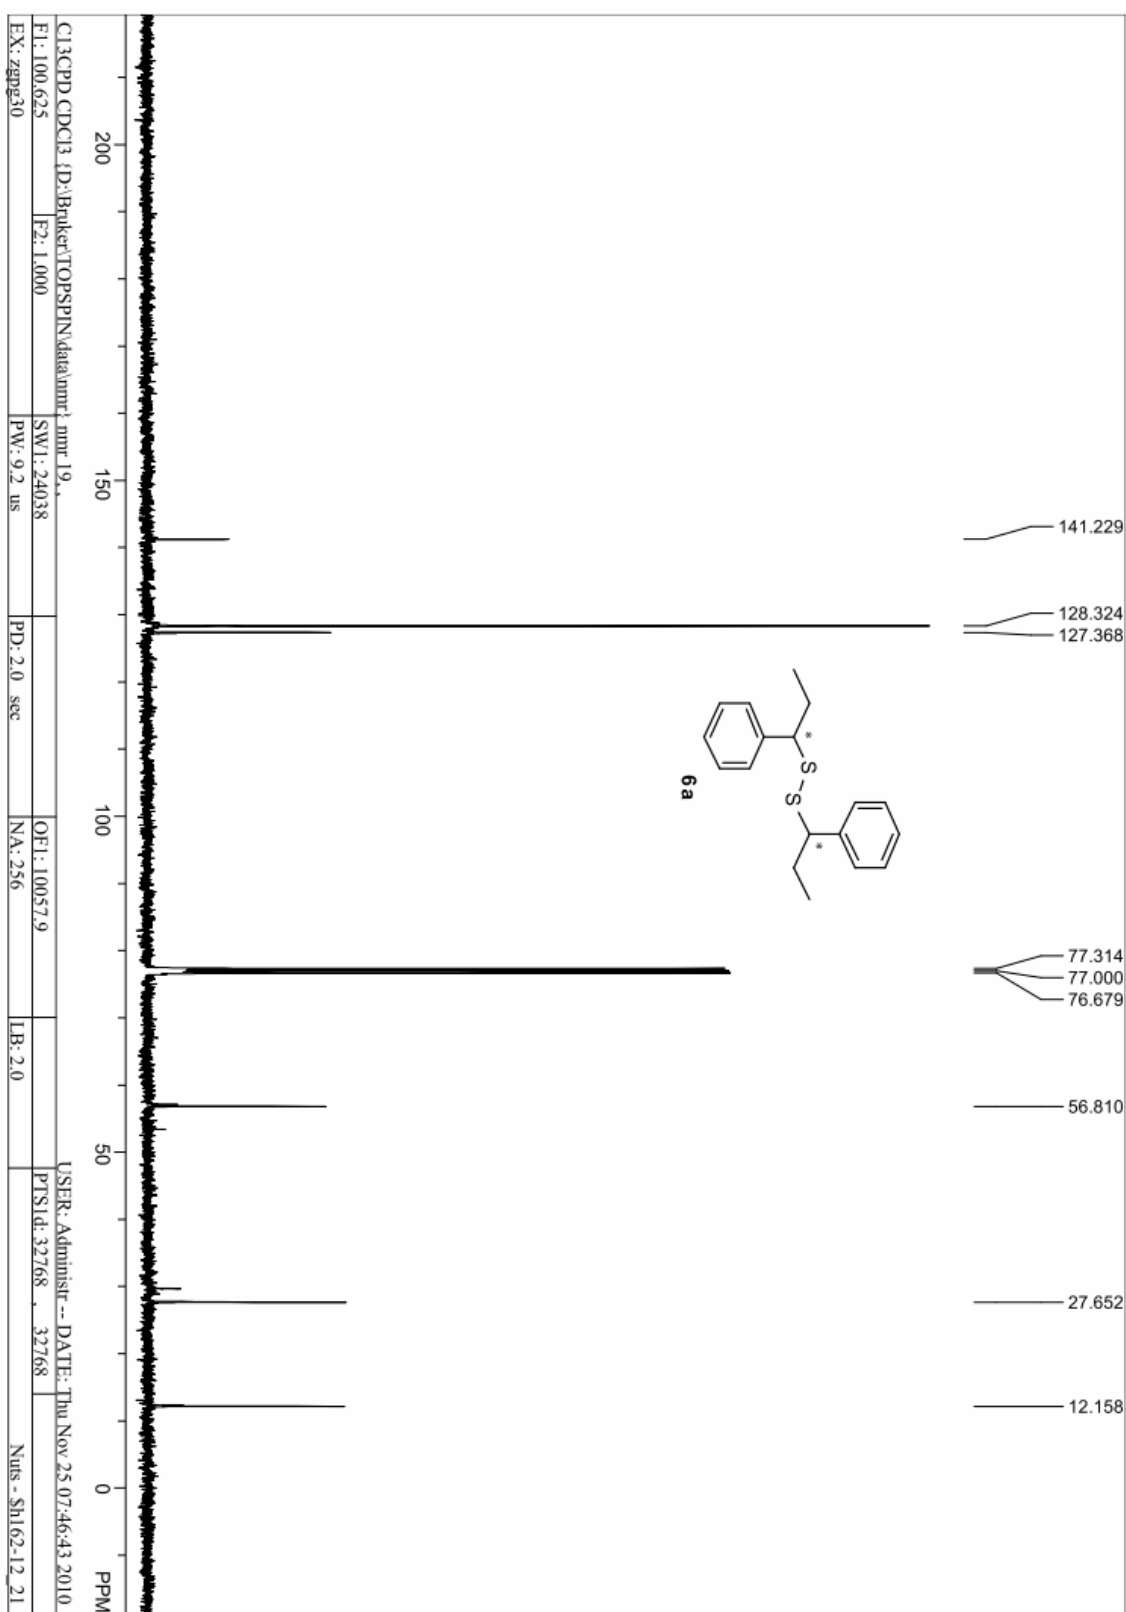

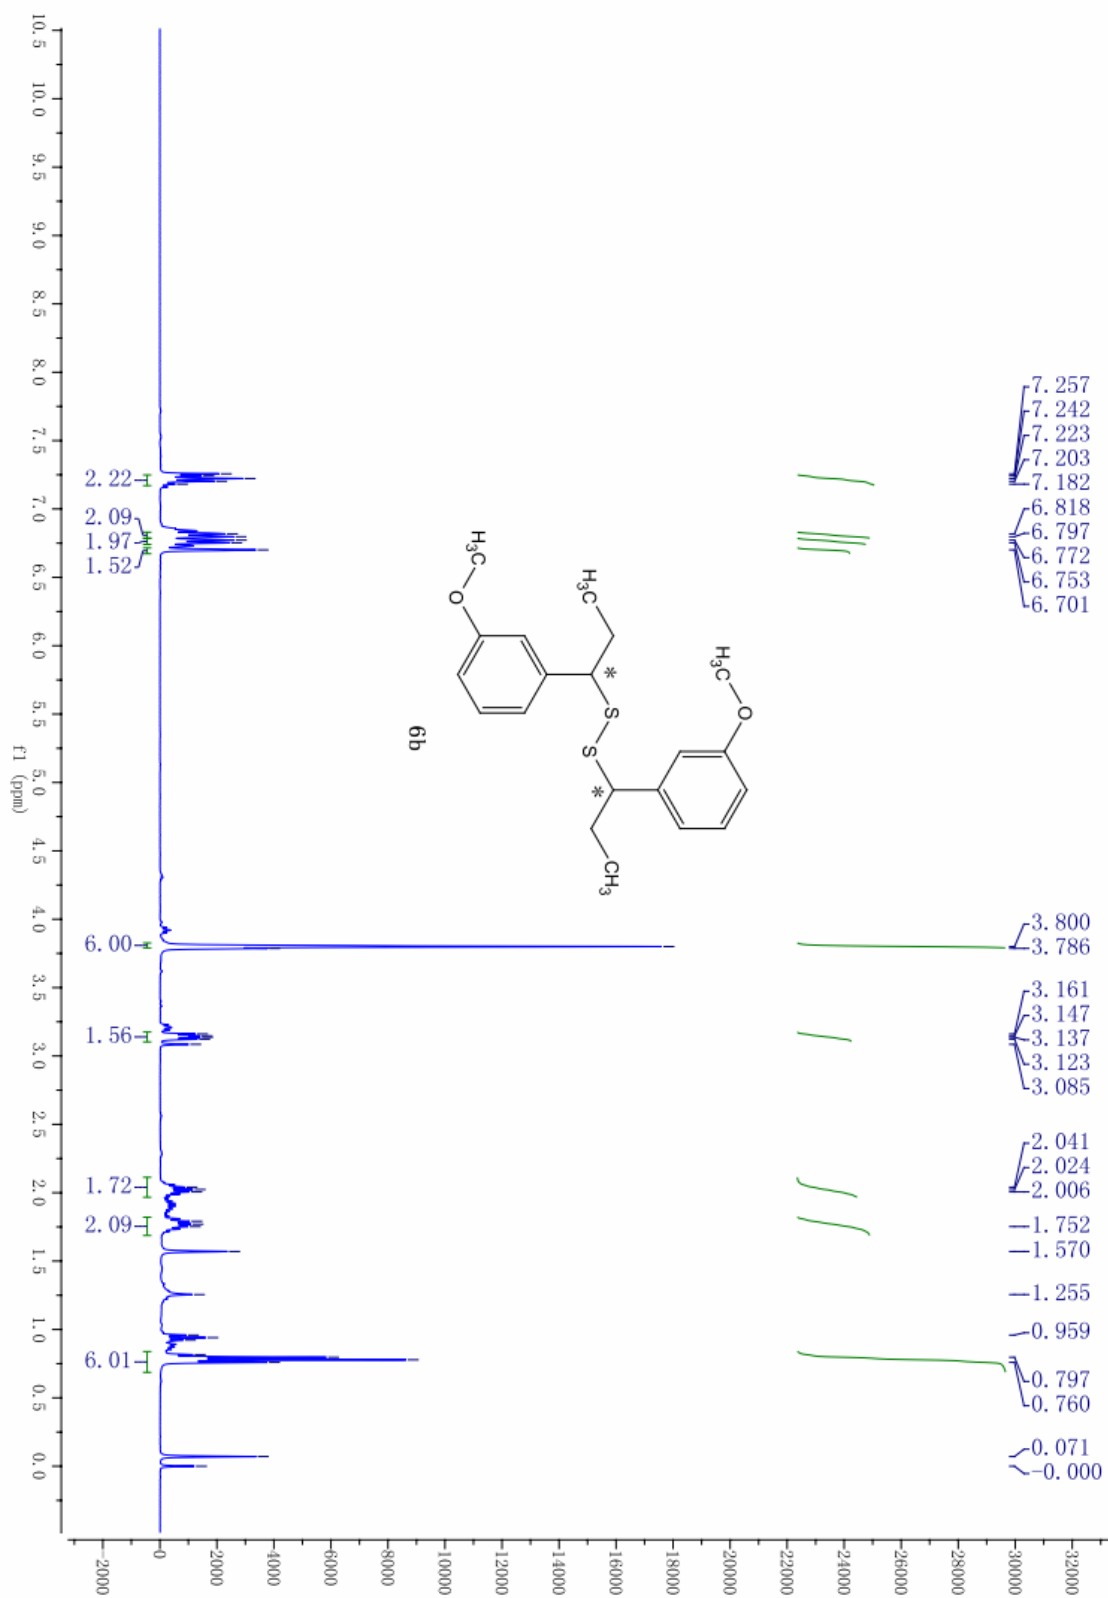

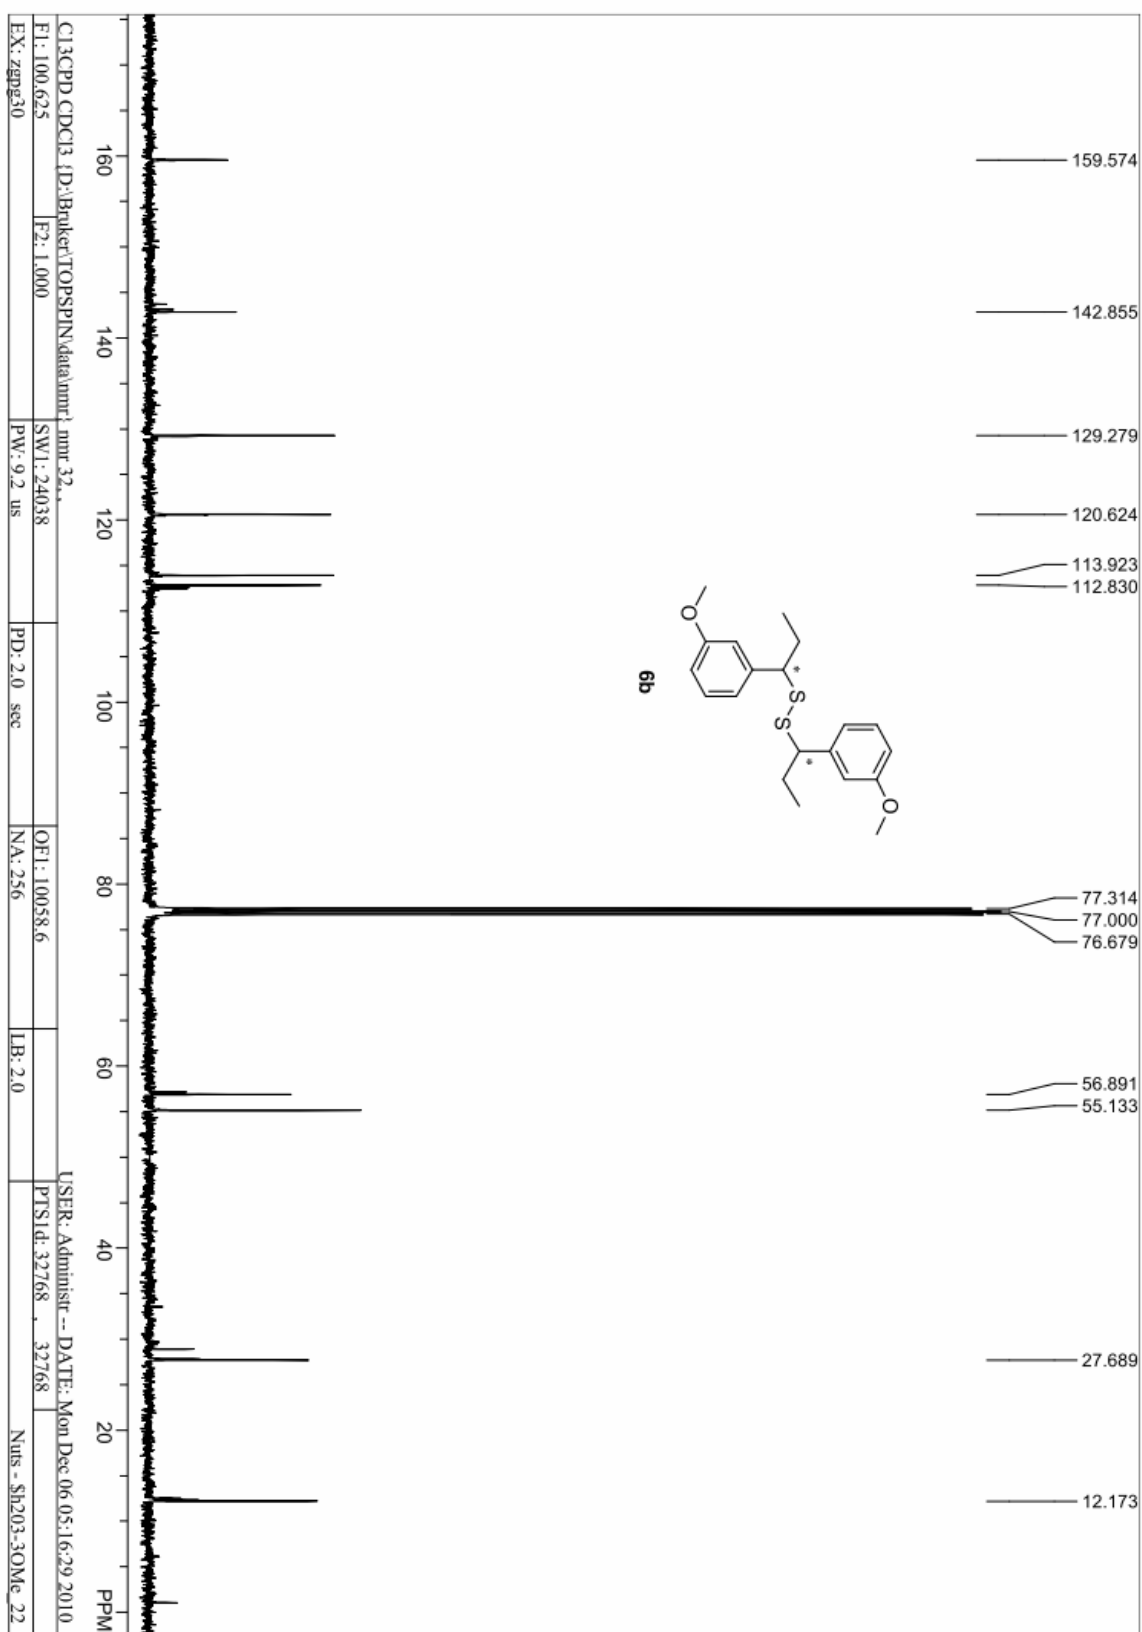

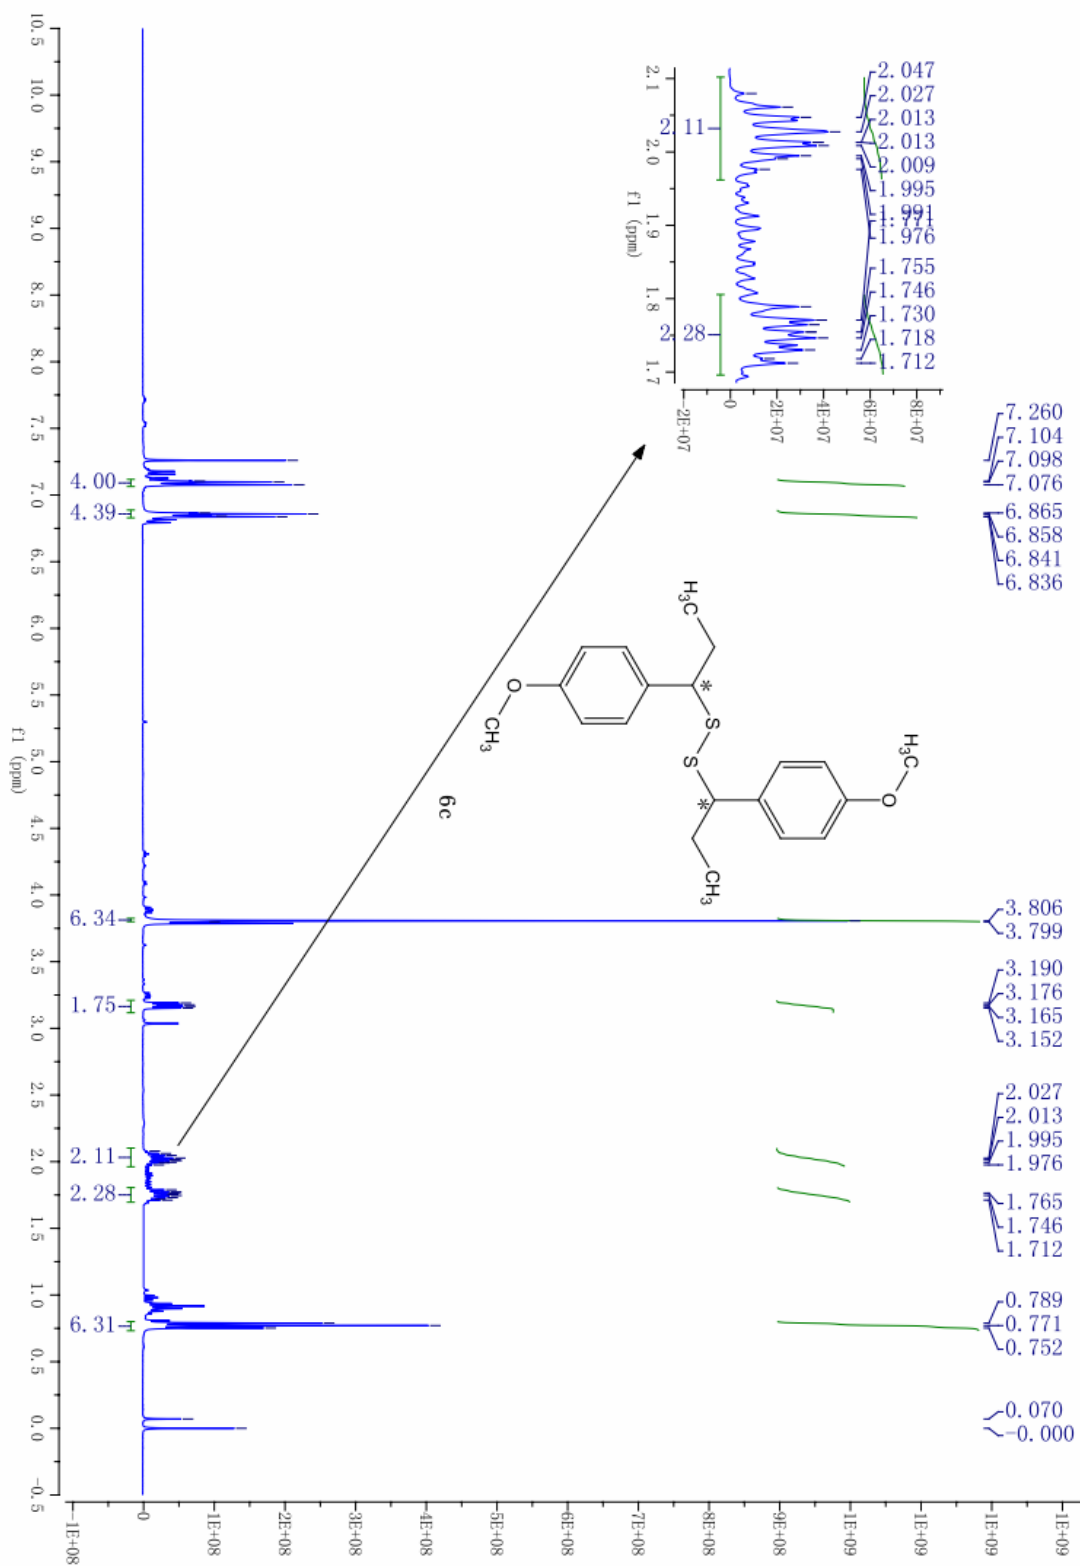



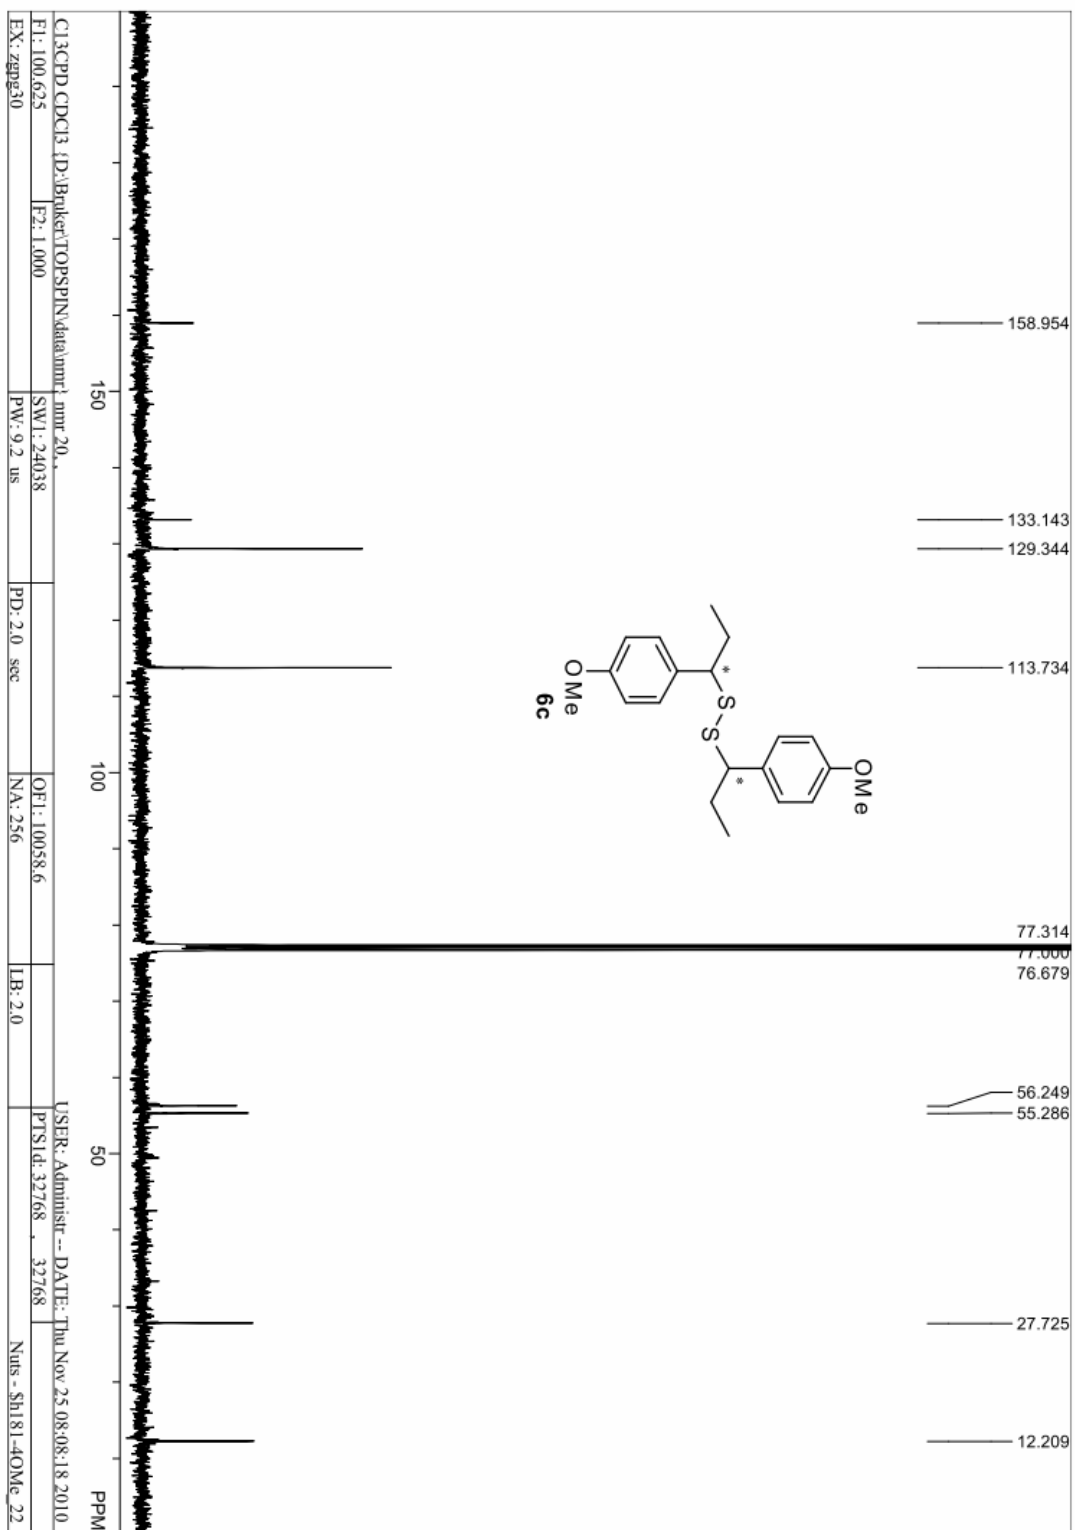

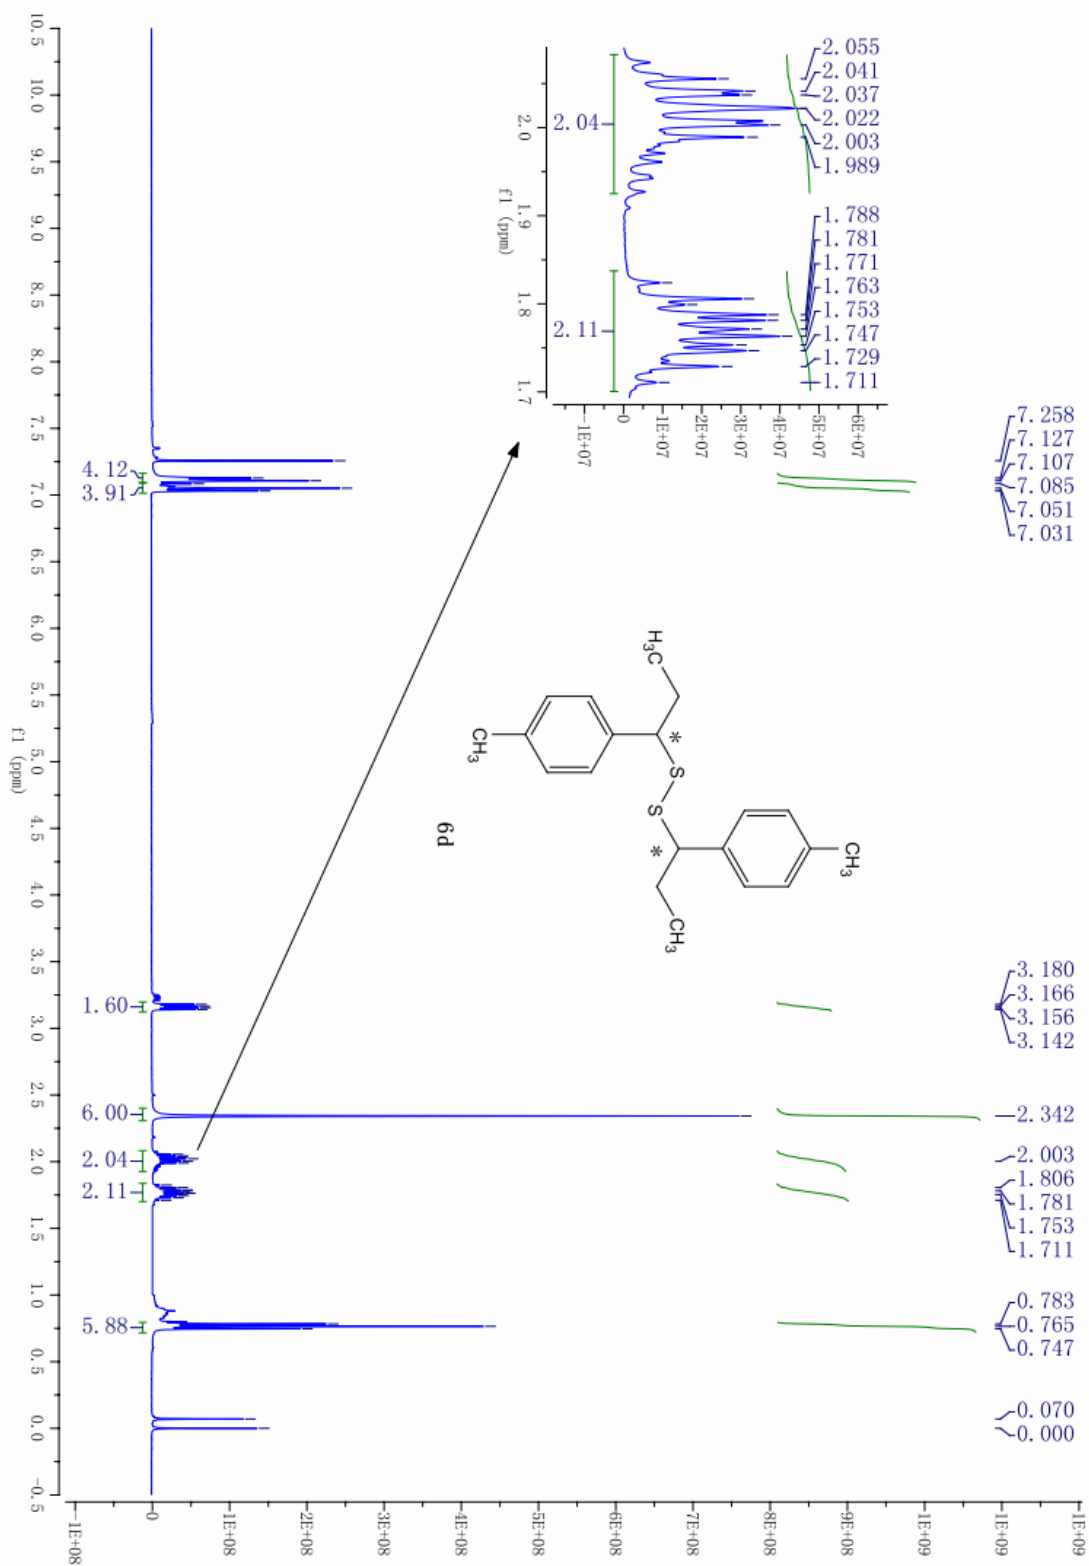

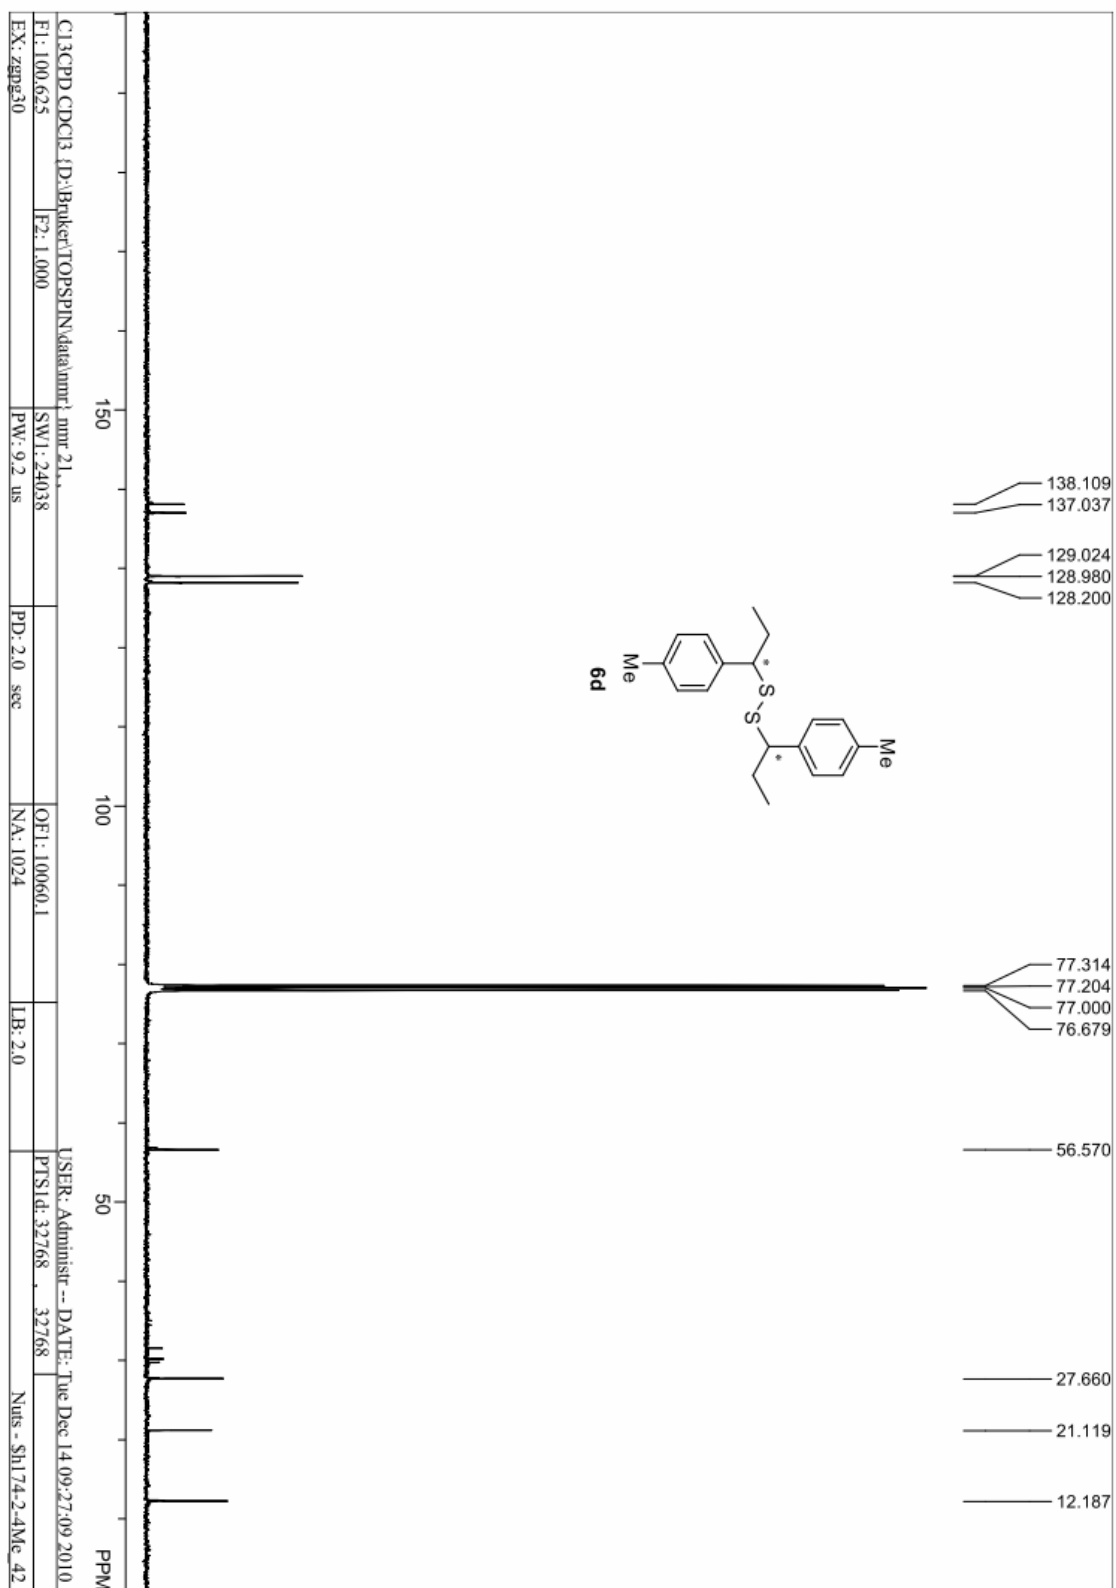

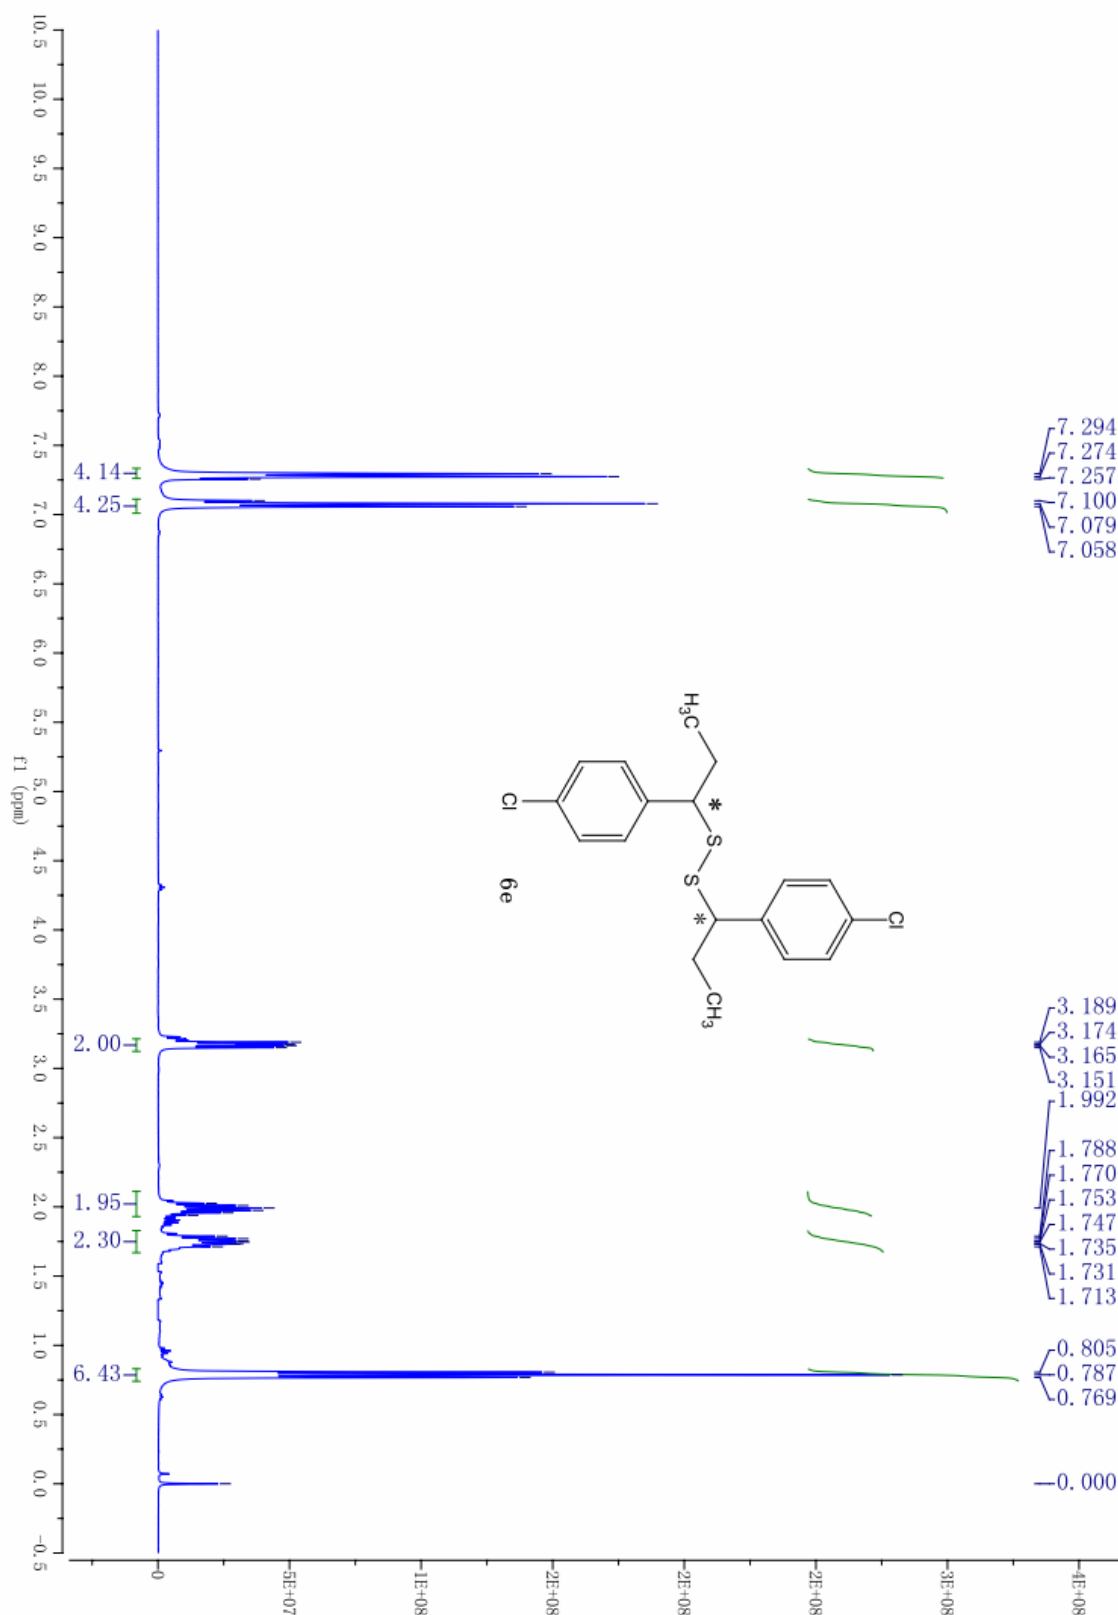

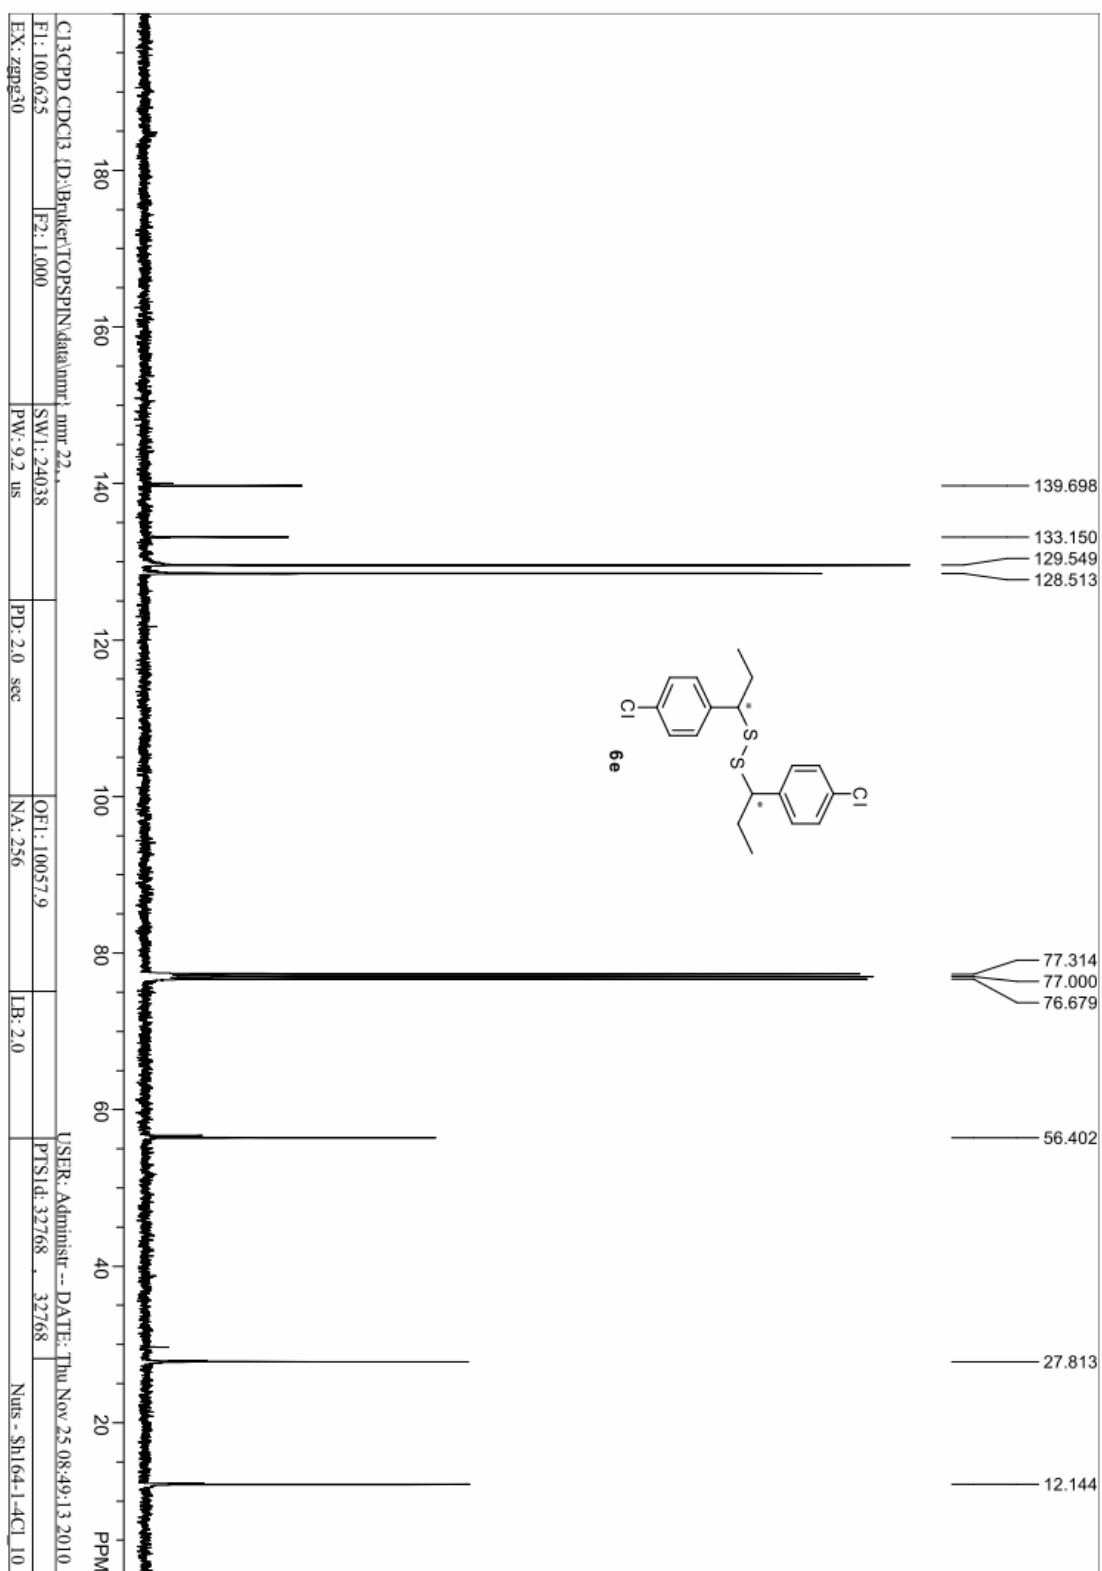

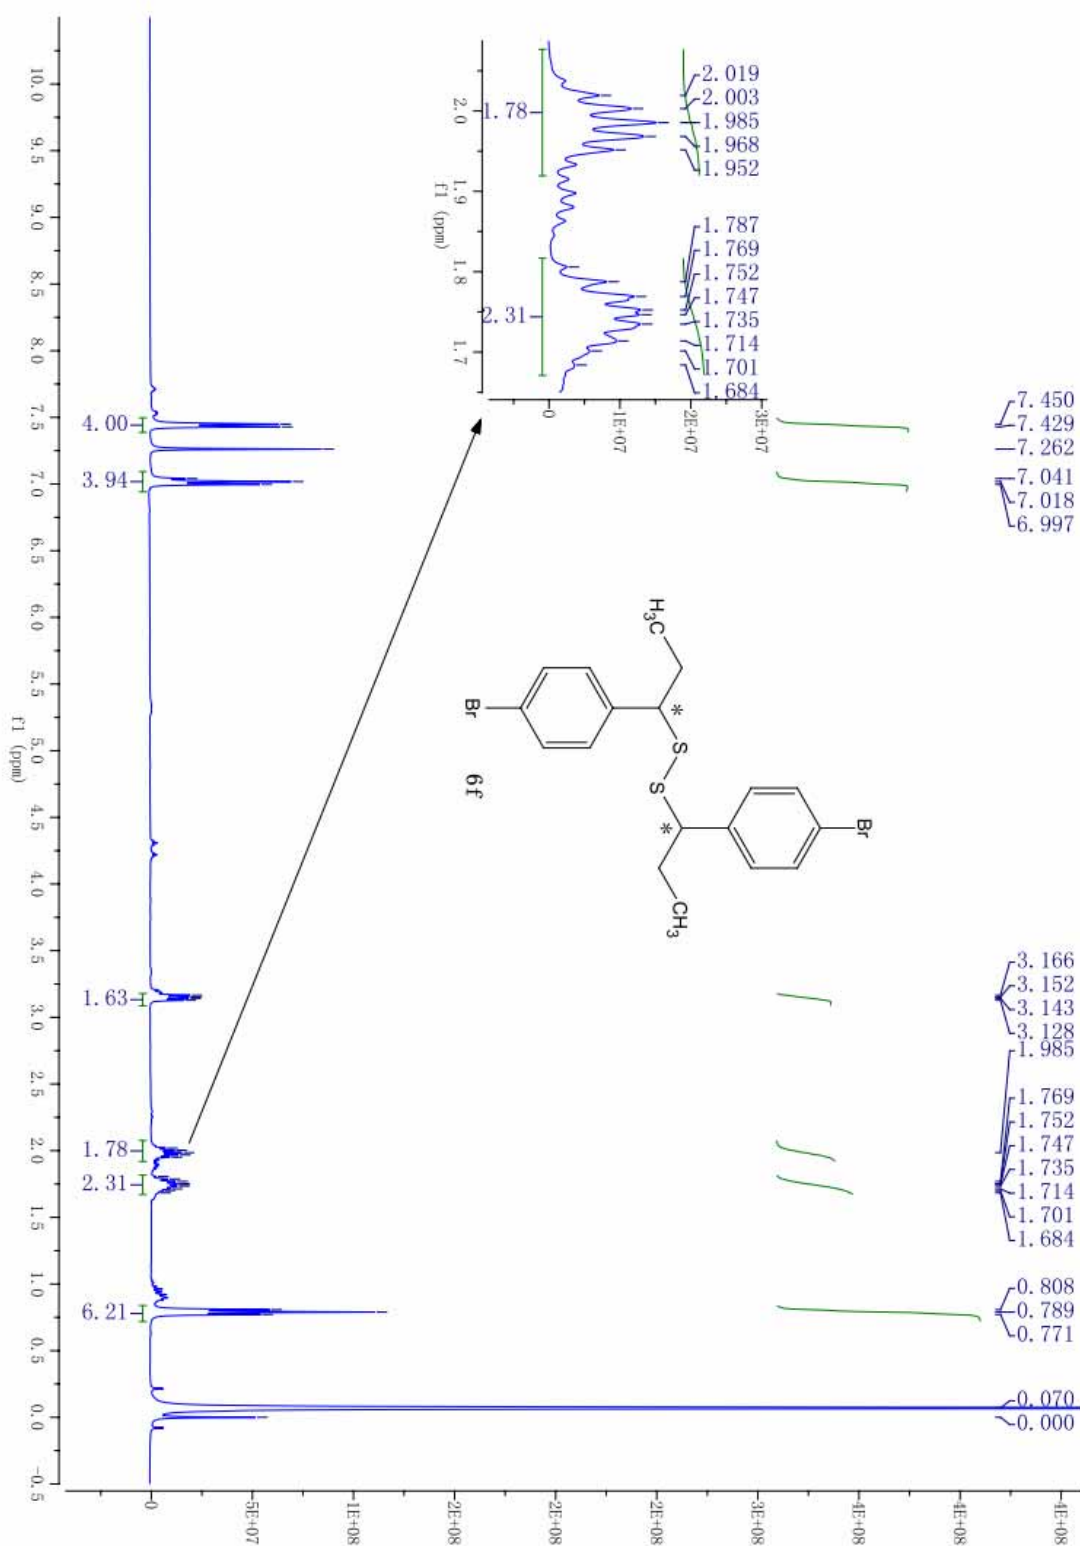

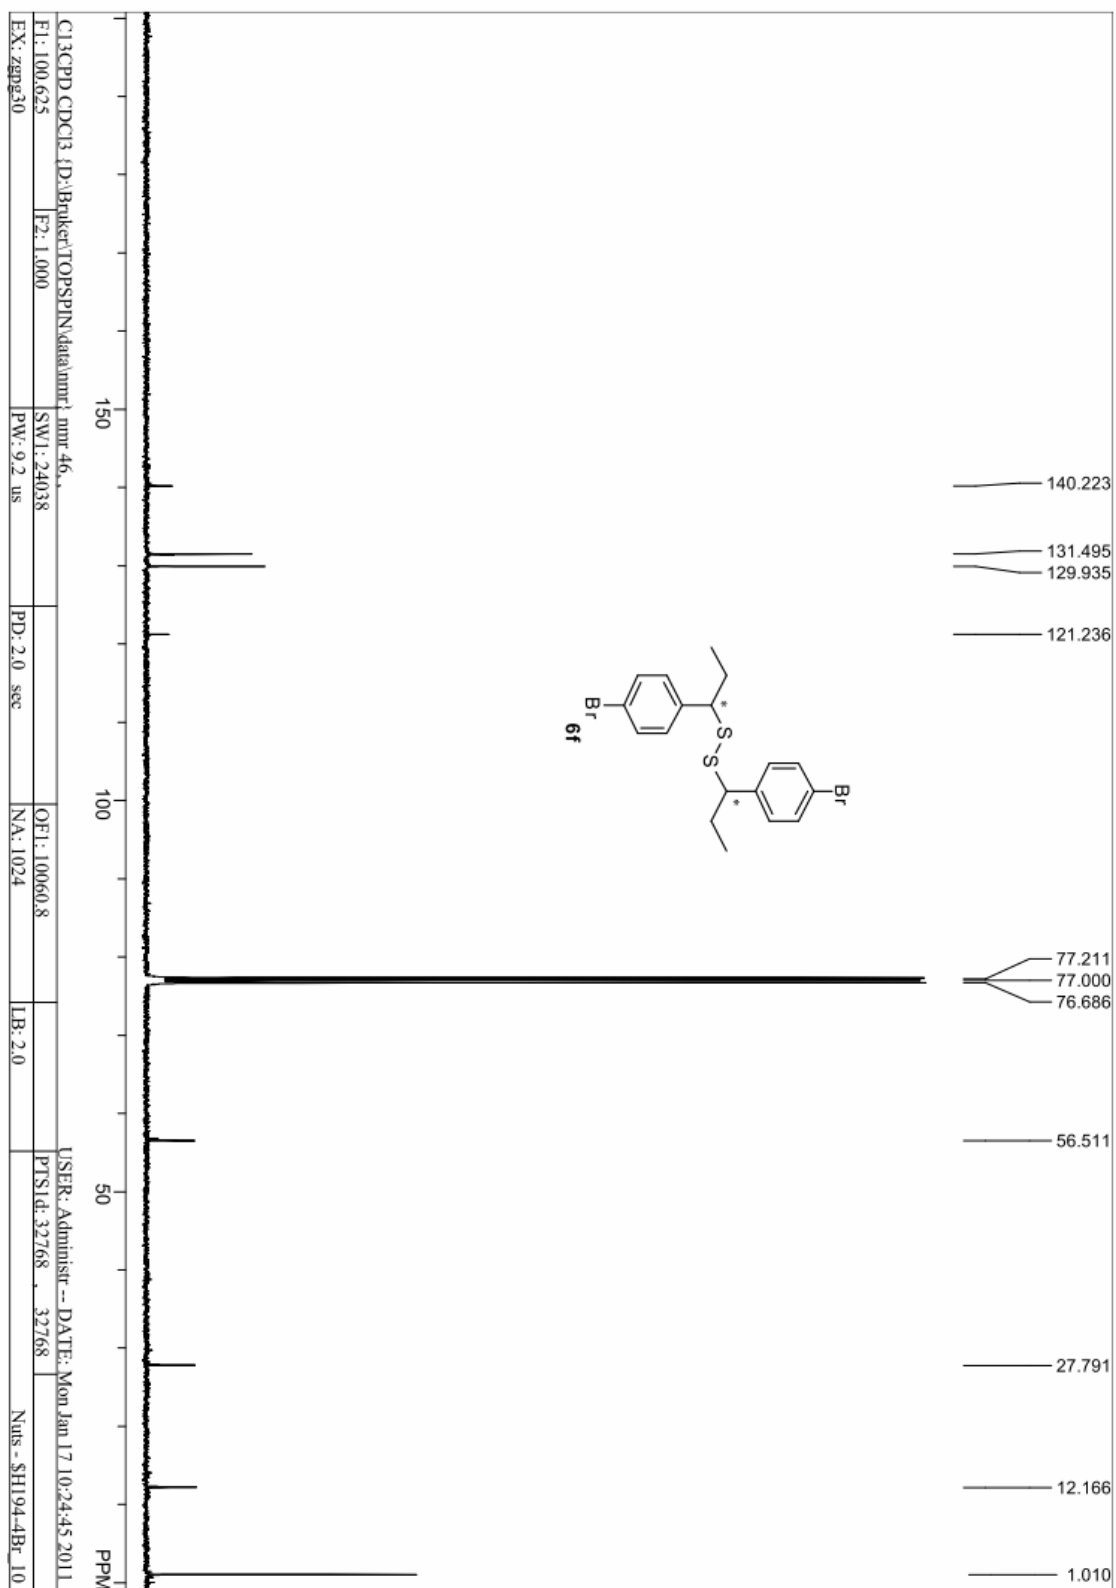

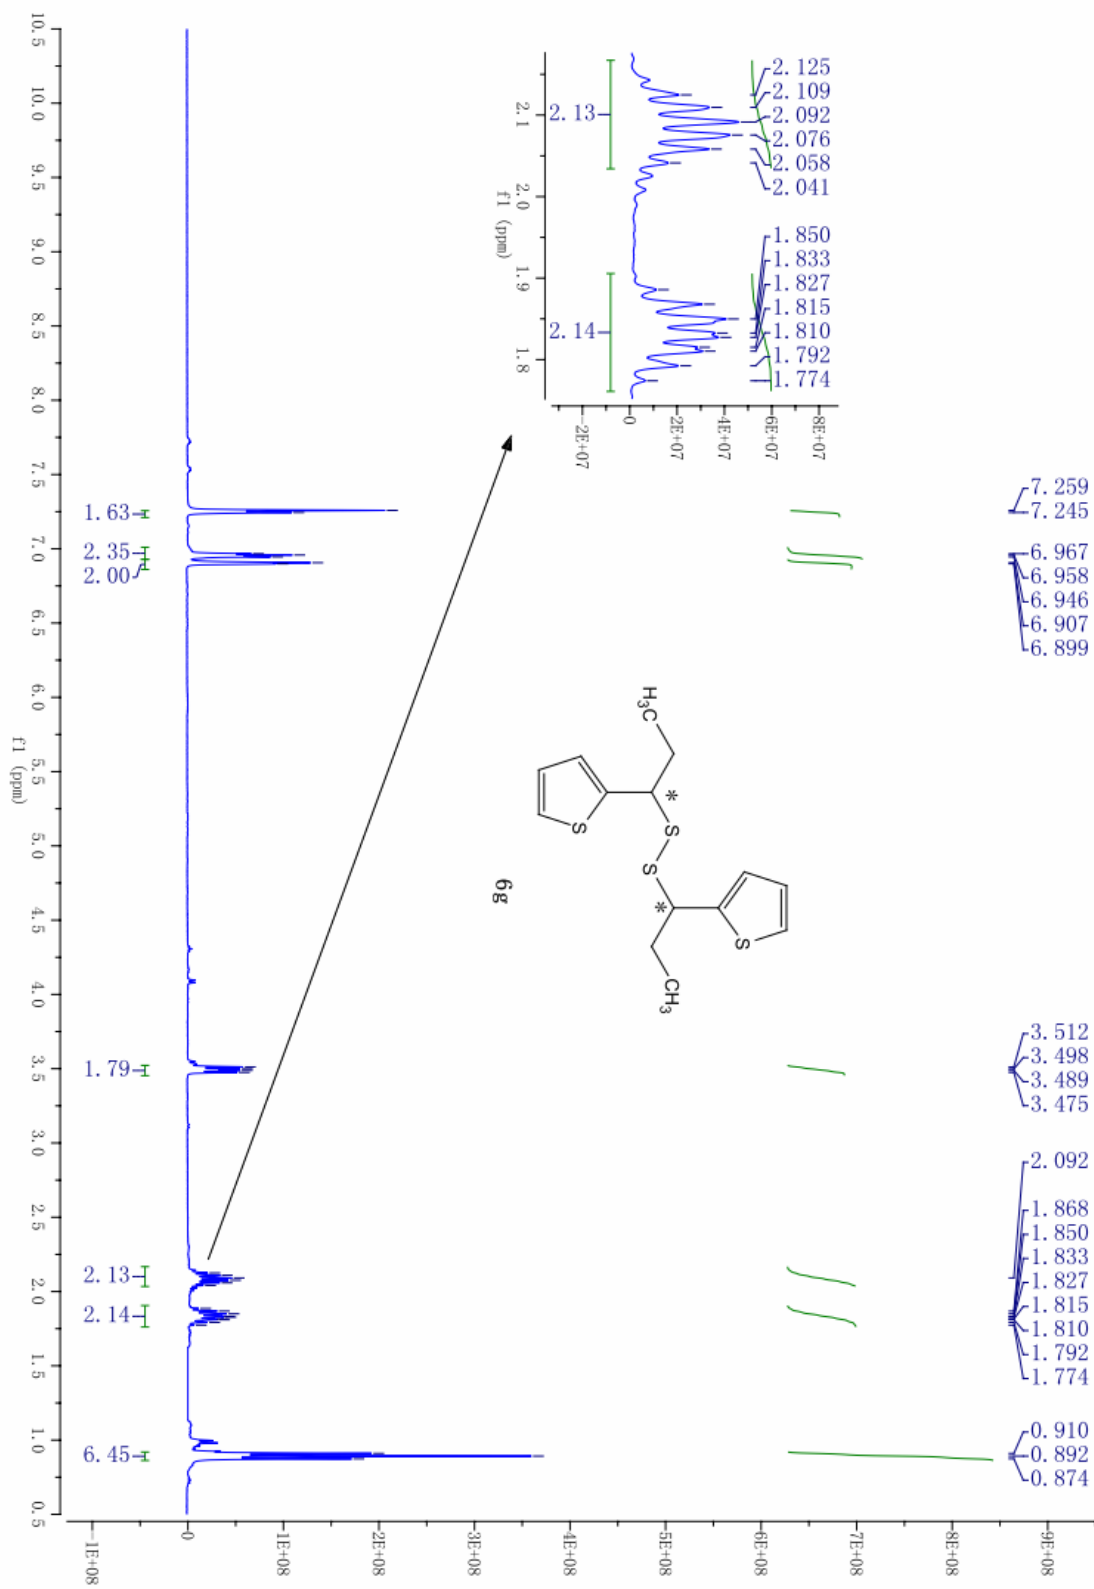



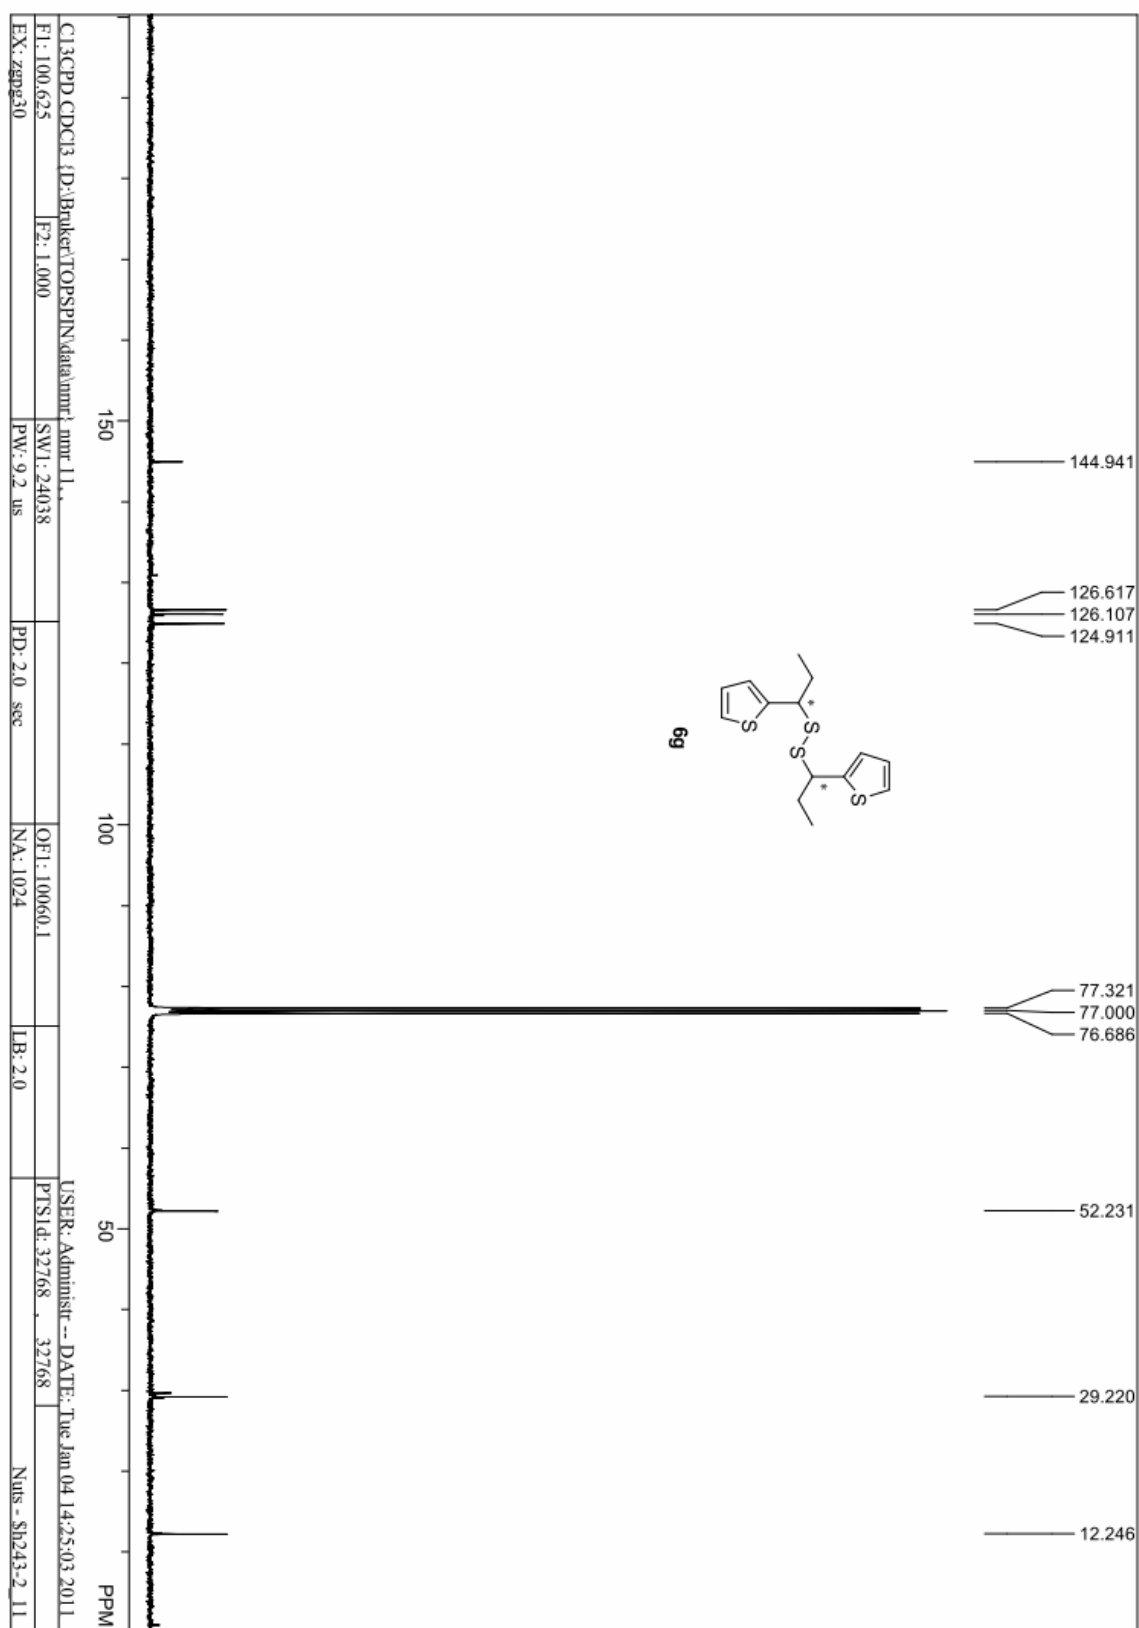

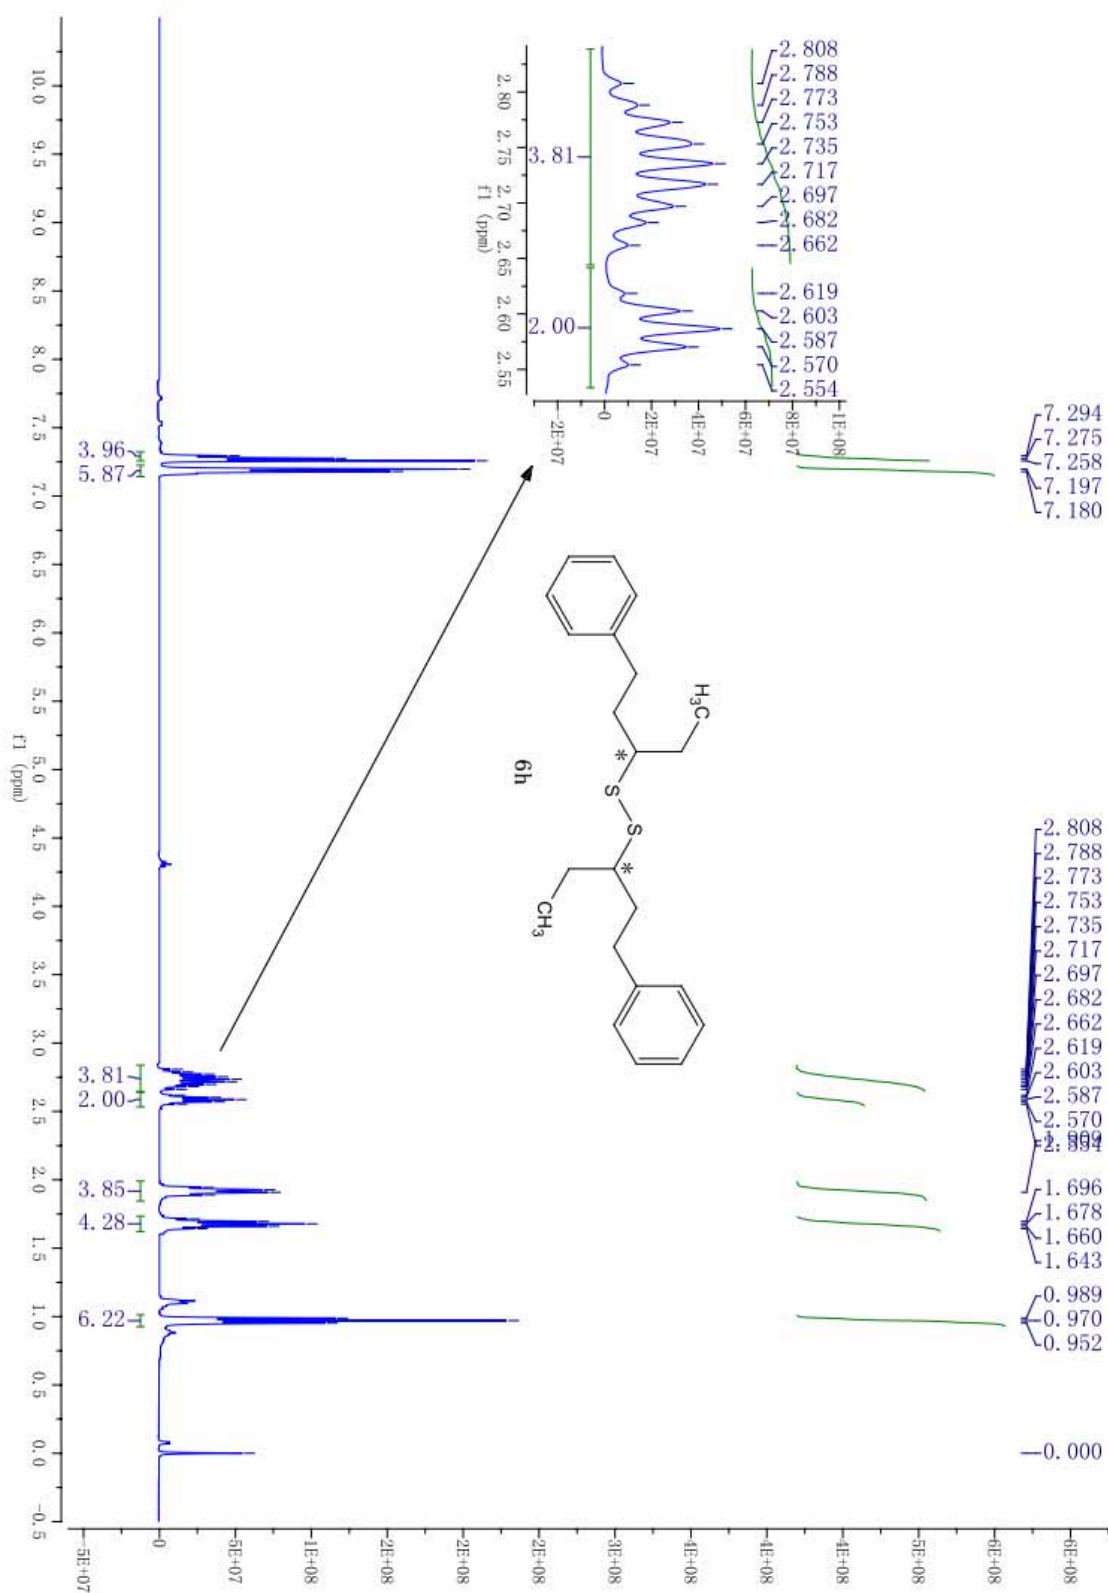

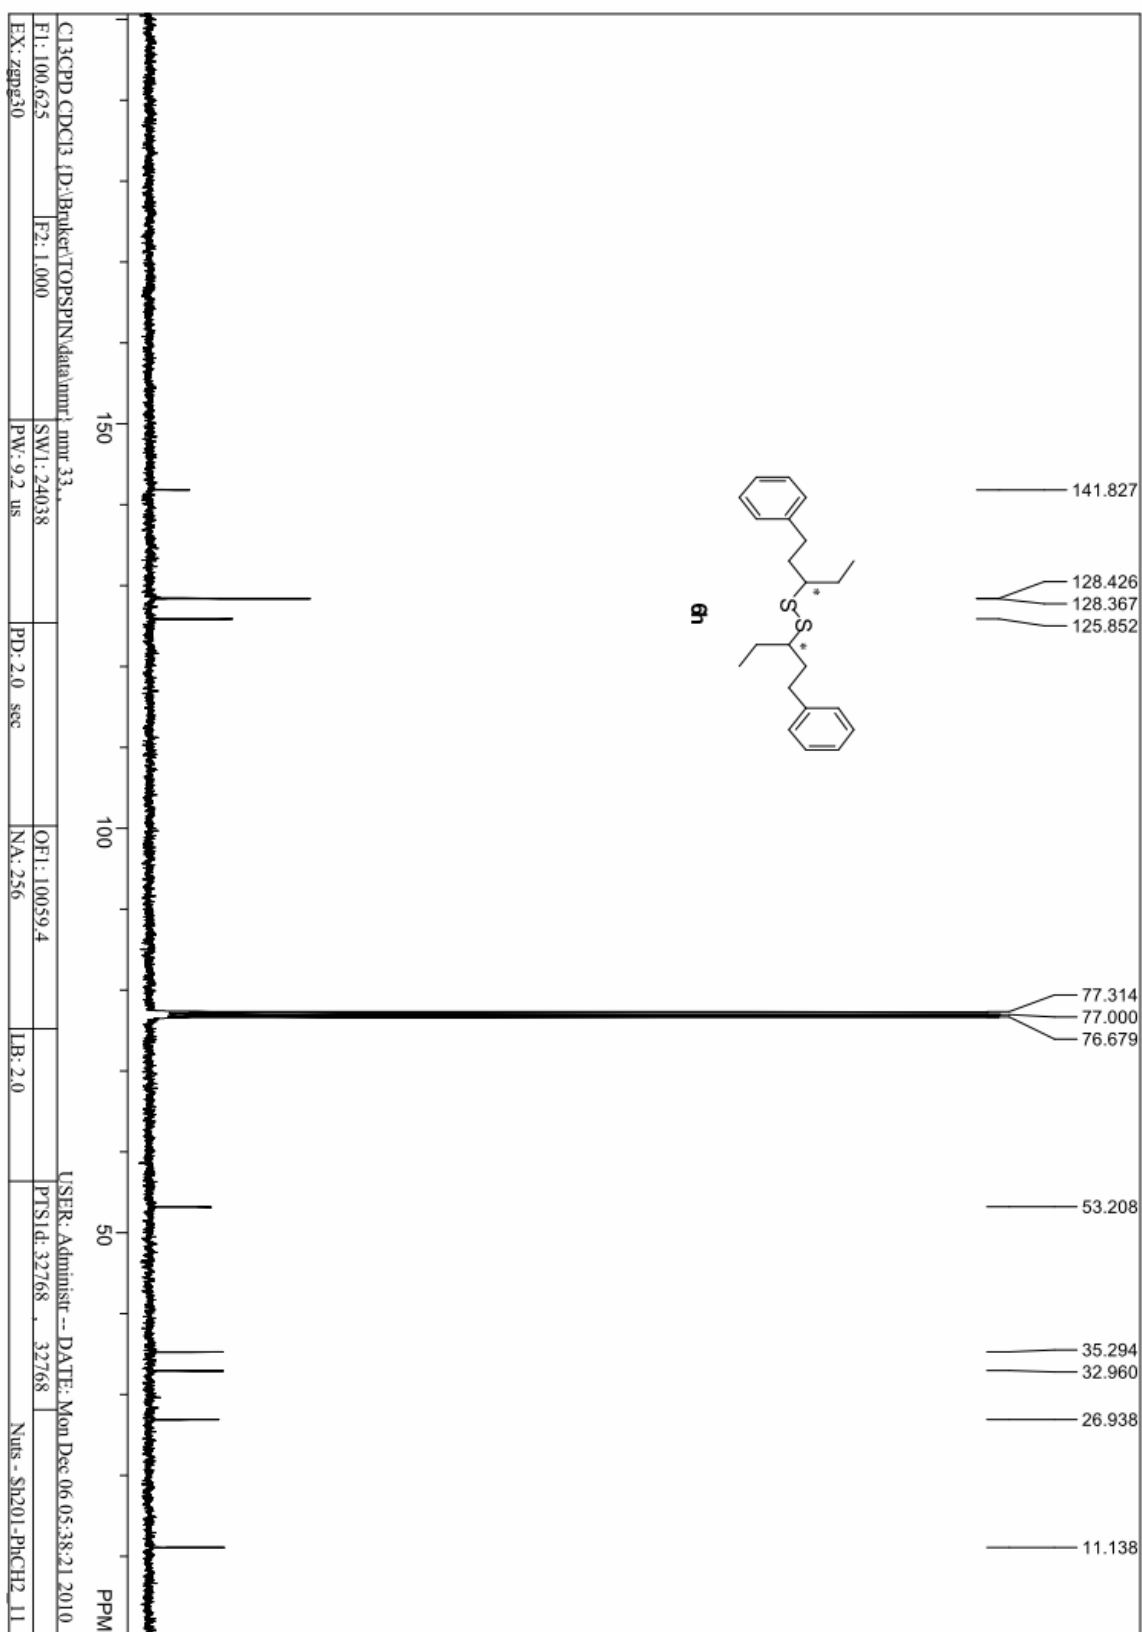

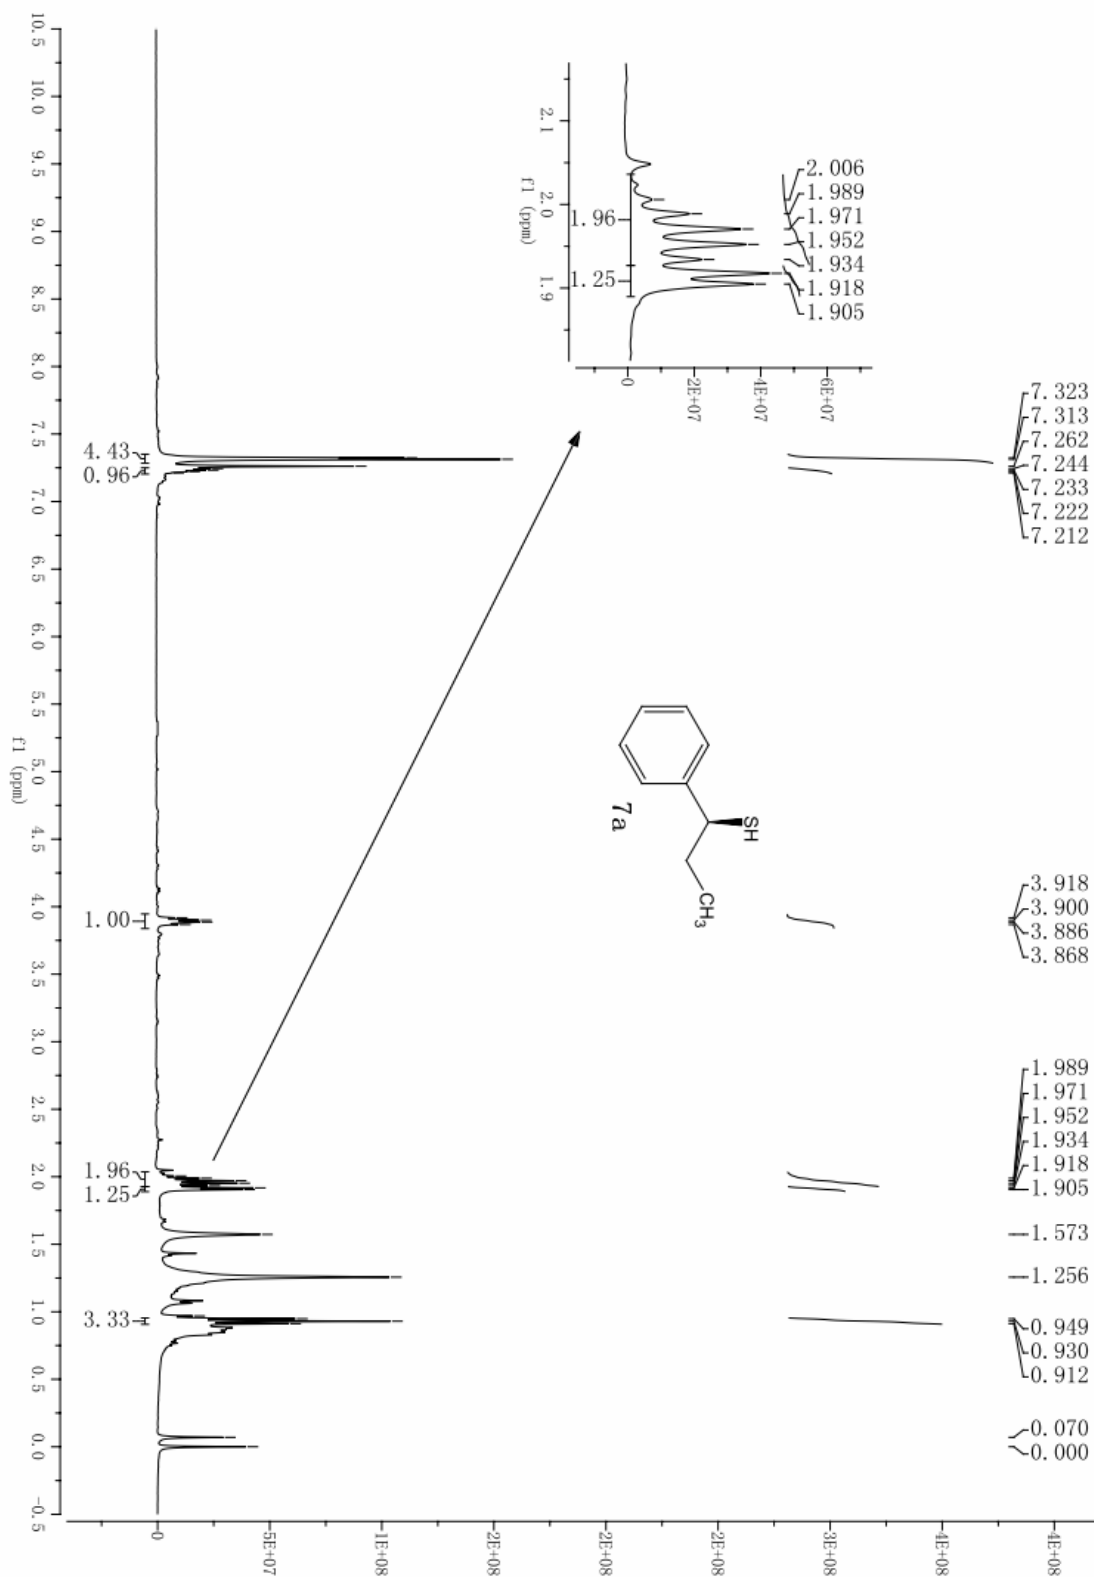

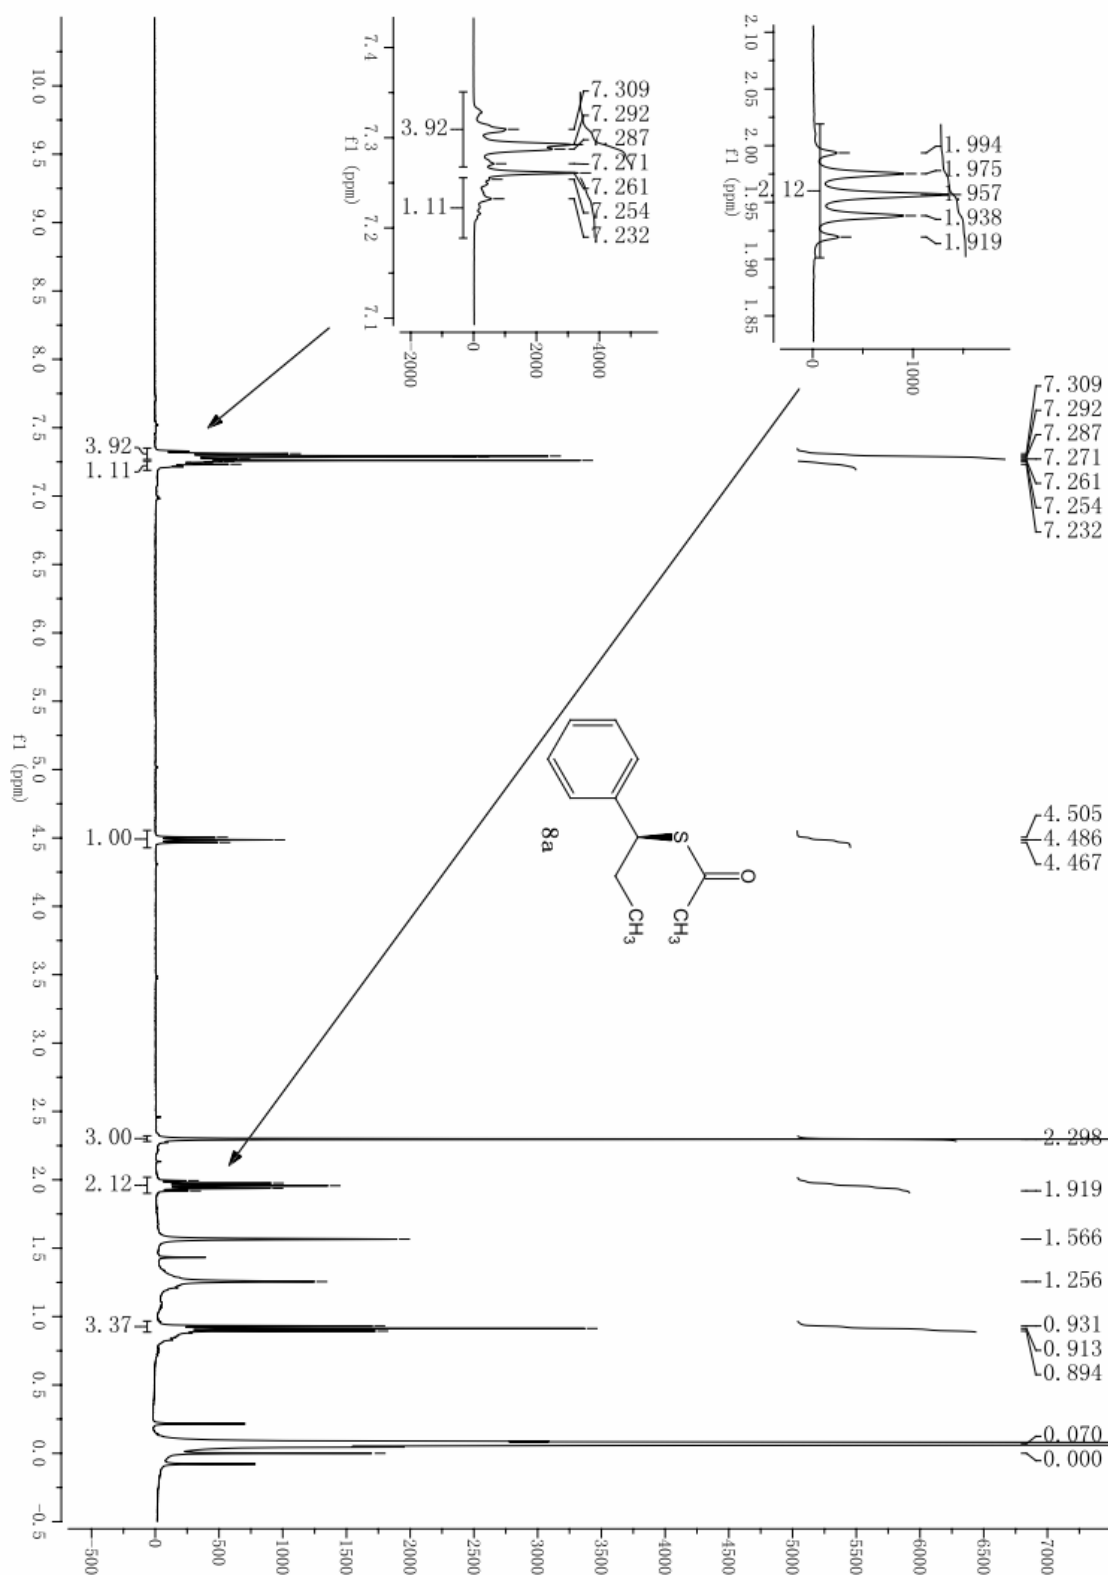

### HPLC Spectra of the Chiral Compounds:

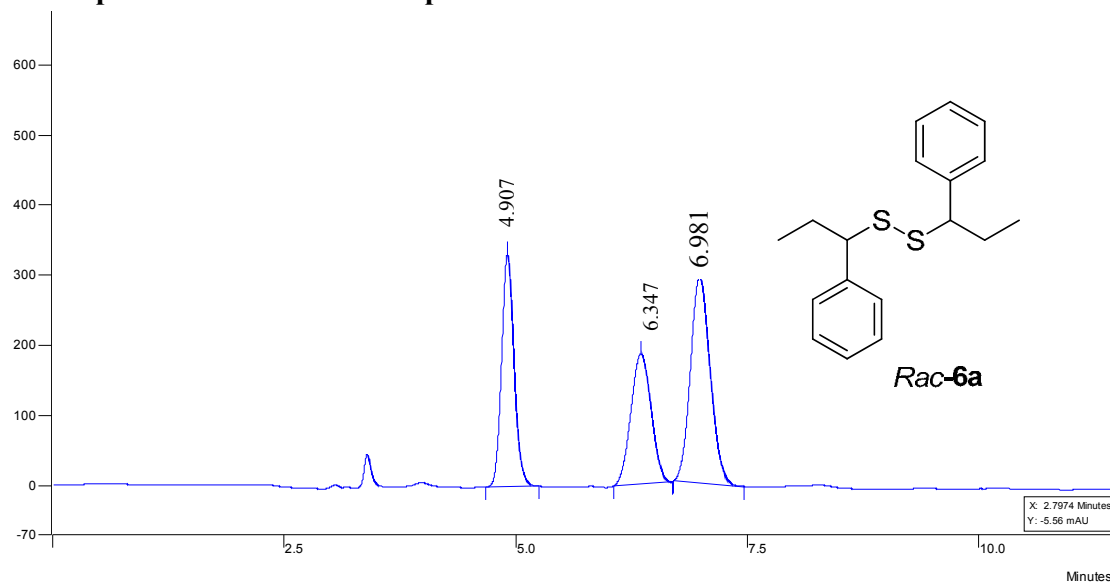

| Peak No. | Peak Name | tR (min) | Result | Sep. Code | W 1/2 (sec) | Efficiency Plates | Efficiency Plates/m | k'   | R   | Tailing (5.0%) |
|----------|-----------|----------|--------|-----------|-------------|-------------------|---------------------|------|-----|----------------|
| 1        |           | 4.907    | 30.232 | BB        | 8.55        | 6571              | 43805               | 3.91 |     | 1.13           |
| 2        |           | 6.347    | 27.399 | BB        | 14.54       | 3803              | 25352               | 5.35 | 4.4 | 1.02           |
| 3        |           | 6.981    | 42.369 | BB        | 13.69       | 5187              | 34581               | 5.98 | 1.6 | 1.11           |

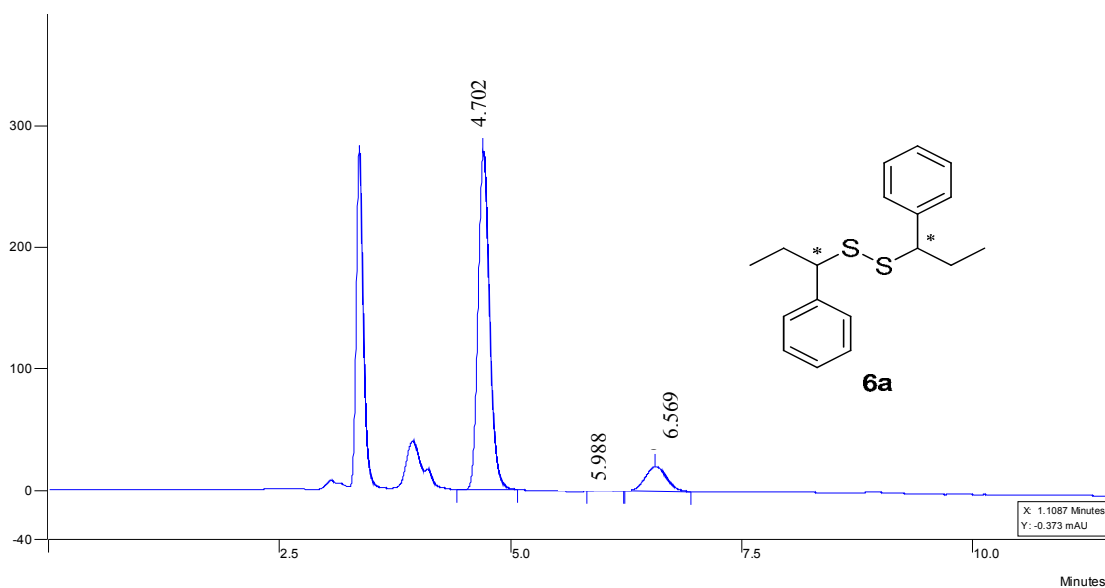

| Peak No. | Peak Name | tR (min) | Result | Sep. Code | W 1/2 (sec) | Efficiency Plates | Efficiency Plates/m | k'   | R   | Tailing (5.0%) |
|----------|-----------|----------|--------|-----------|-------------|-------------------|---------------------|------|-----|----------------|
| 1        |           | 4.702    | 87.597 | BB        | 7.86        | 7155              | 47697               | 3.70 |     | 1.17           |
| 2        |           | 5.988    | 0.553  | BB        | 11.64       | 5285              | 35232               | 4.99 | 4.7 | 1.08           |
| 3        |           | 6.569    | 11.851 | BB        | 14.96       | 3848              | 25650               | 5.57 | 1.5 | 1.04           |

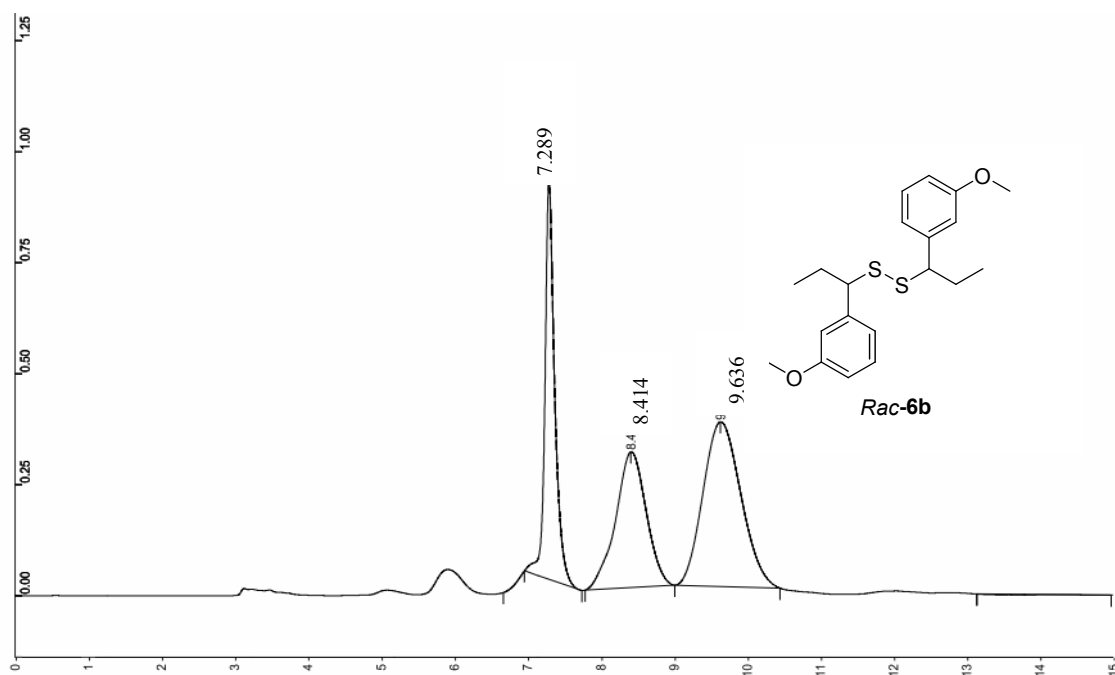

| Peak No.       | Peak Name | Result ( )      | Ret. Time (min) | Time Offset (min) | Area (counts)    | Sep. Code | Width 1/2 (sec) | Status Codes |
|----------------|-----------|-----------------|-----------------|-------------------|------------------|-----------|-----------------|--------------|
| 1              |           | 27.2086         | 7.289           | 0.000             | 83036672         | BB        | 7.5             |              |
| 2              |           | 29.0169         | 8.414           | 0.000             | 88555512         | BB        | 26.6            |              |
| 3              |           | 43.7745         | 9.636           | 0.000             | 133593648        | BB        | 34.0            |              |
| <b>Totals:</b> |           | <b>100.0000</b> |                 | <b>0.000</b>      | <b>305185832</b> |           |                 |              |

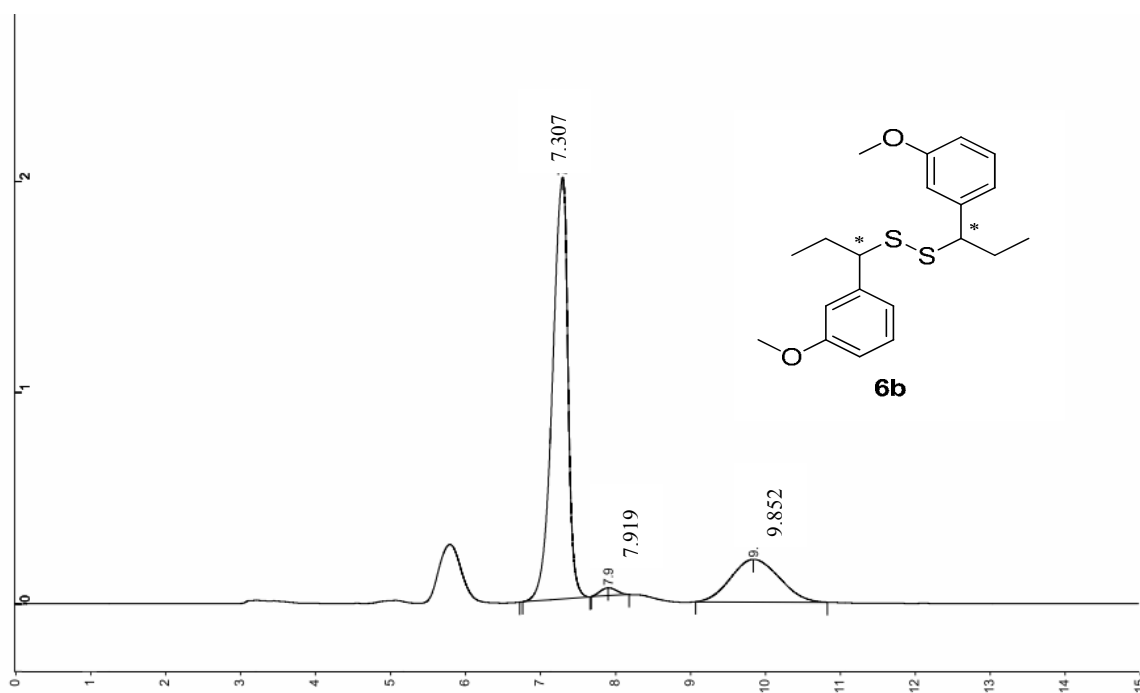

| Peak No. | Peak Name | Result (°) | Ret. Time (min) | Time Offset (min) | Area (counts) | Sep. Code | Width 1/2 (sec) | Status Codes |
|----------|-----------|------------|-----------------|-------------------|---------------|-----------|-----------------|--------------|
| 1        |           | 74.8669    | 7.307           | 0.000             | 285544800     | BB        | 13.0            |              |
| 2        |           | 1.4791     | 7.919           | 0.000             | 5641179       | BB        | 16.5            |              |
| 3        |           | 23.6540    | 9.852           | 0.000             | 90217280      | BB        | 42.8            |              |
| Totals:  |           | 100.0000   |                 | 0.000             | 381403259     |           |                 |              |

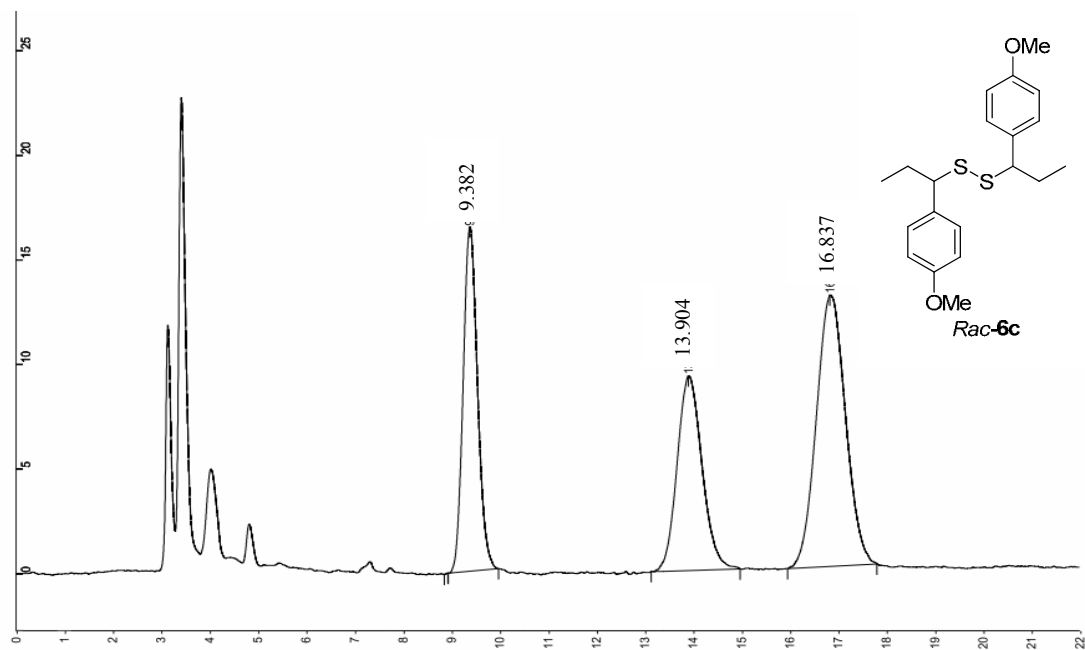

| Peak No. | Peak Name | tR (min) | Result | Sep. Code | W 1/2 (sec) | Efficiency Plates | Efficiency Plates/m | k'    | R   | Tailing (5.0%) |
|----------|-----------|----------|--------|-----------|-------------|-------------------|---------------------|-------|-----|----------------|
| 1        |           | 9.382    | 27.912 | BB        | 19.12       | 4805              | 32036               | 8.38  |     | 1.15           |
| 2        |           | 13.904   | 27.123 | BB        | 33.02       | 3540              | 23603               | 12.90 | 6.1 | 1.16           |
| 3        |           | 16.837   | 44.965 | BB        | 39.36       | 3653              | 24351               | 15.84 | 2.9 | 1.08           |



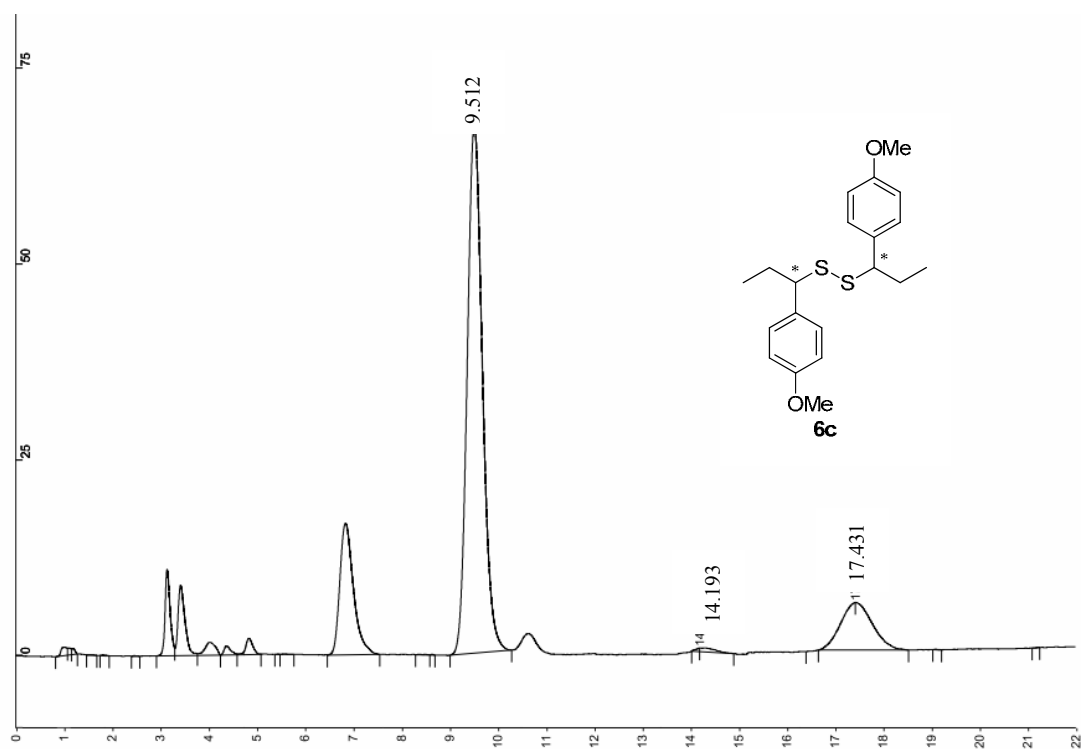

| Peak No. | Peak Name | Result (°) | Ret. Time (min) | Time Offset (min) | Area (counts) | Sep. Code | Width 1/2 (sec) | Status Codes |
|----------|-----------|------------|-----------------|-------------------|---------------|-----------|-----------------|--------------|
| 1        |           | 83.6971    | 9.512           | 0.000             | 14758128      | BB        | 20.2            |              |
| 2        |           | 0.7373     | 14.193          | 0.000             | 130011        | BB        | 21.9            |              |
| 3        |           | 15.5656    | 17.431          | 0.000             | 2744641       | BB        | 42.9            |              |
| Totals:  |           | 100.0000   |                 | 0.000             | 17632780      |           |                 |              |

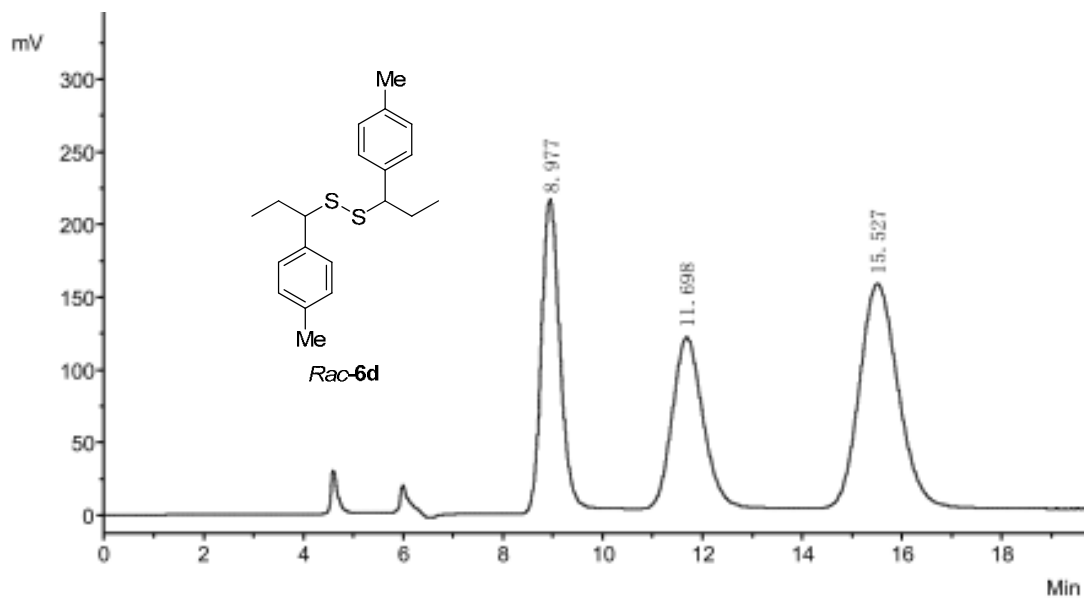

| No.   | PeakNo | R. Time | PeakHeight | PeakArea   | PerCent  |
|-------|--------|---------|------------|------------|----------|
| 1     | 1      | 8.977   | 213458.6   | 5551725.4  | 29.2447  |
| 2     | 2      | 11.698  | 117612.9   | 5065982.4  | 26.6860  |
| 3     | 3      | 15.527  | 154762.0   | 8365995.9  | 44.0694  |
| Total |        |         | 485833.6   | 18983703.7 | 100.0000 |

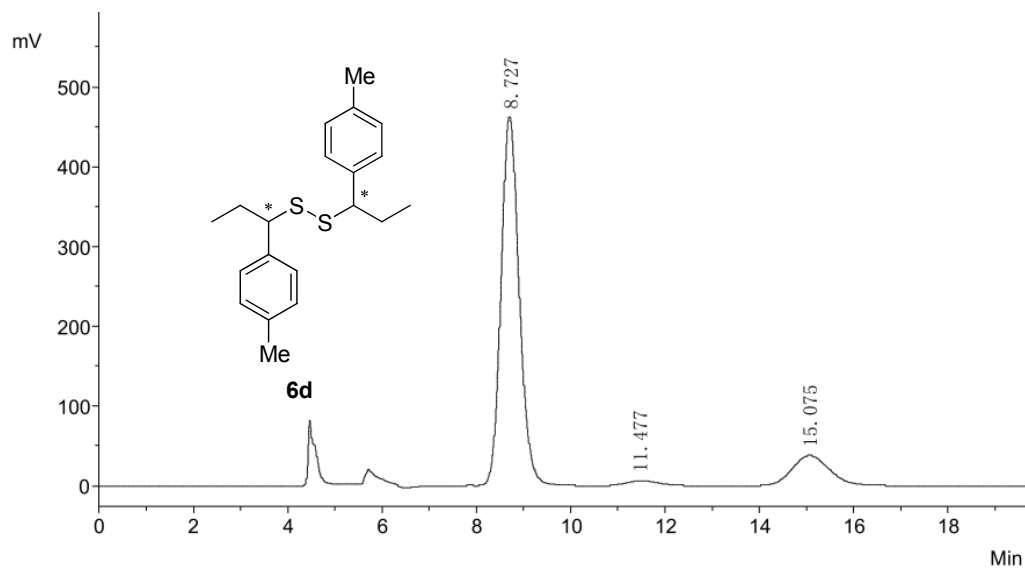

| No.   | PeakNo | R. Time | PeakHeight | PeakArea   | PerCent  |
|-------|--------|---------|------------|------------|----------|
| 1     | 1      | 8.727   | 460584.6   | 12395019.1 | 83.8146  |
| 2     | 2      | 11.477  | 6692.9     | 303144.4   | 2.0498   |
| 3     | 3      | 15.075  | 37860.8    | 2090452.5  | 14.1356  |
| Total |        |         | 505138.4   | 14788615.9 | 100.0000 |

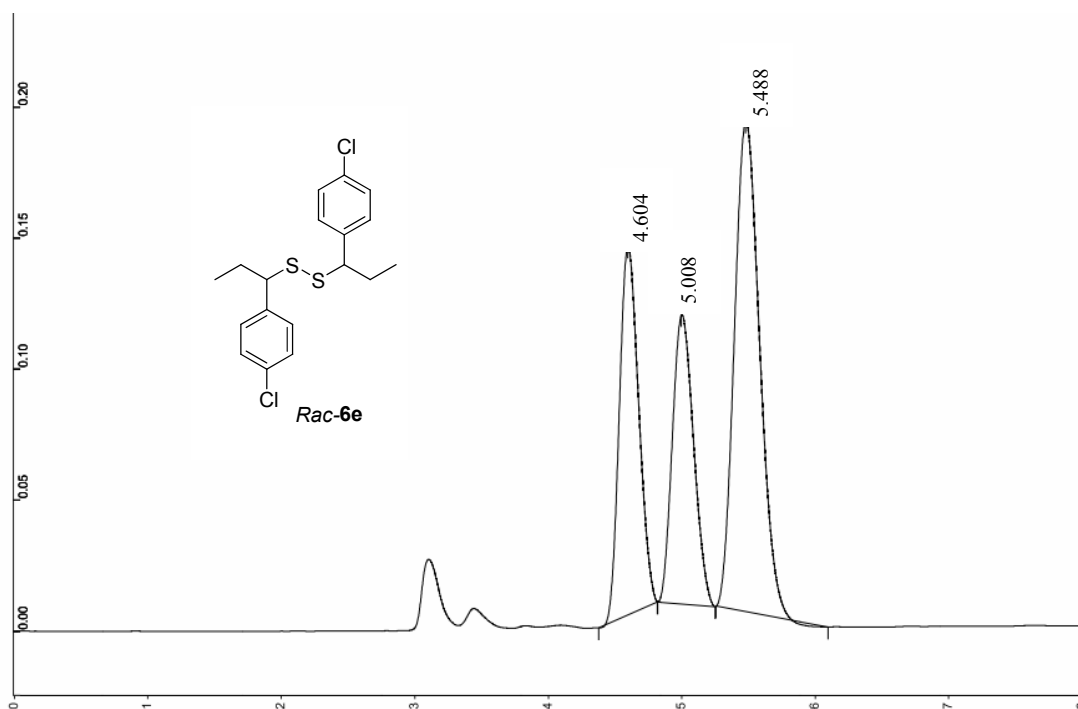

| Peak No.       | Peak Name | Result (°)      | Ret. Time (min) | Time Offset (min) | Area (counts)   | Sep. Code | Width 1/2 (sec) | Status Codes |
|----------------|-----------|-----------------|-----------------|-------------------|-----------------|-----------|-----------------|--------------|
| 1              |           | 27.8794         | 4.604           | 0.000             | 14130920        | BB        | 9.9             |              |
| 2              |           | 23.9260         | 5.008           | 0.000             | 12127087        | BB        | 10.5            |              |
| 3              |           | 48.1946         | 5.488           | 0.000             | 24427854        | BB        | 12.2            |              |
| <b>Totals:</b> |           | <b>100.0000</b> |                 | <b>0.000</b>      | <b>50685861</b> |           |                 |              |

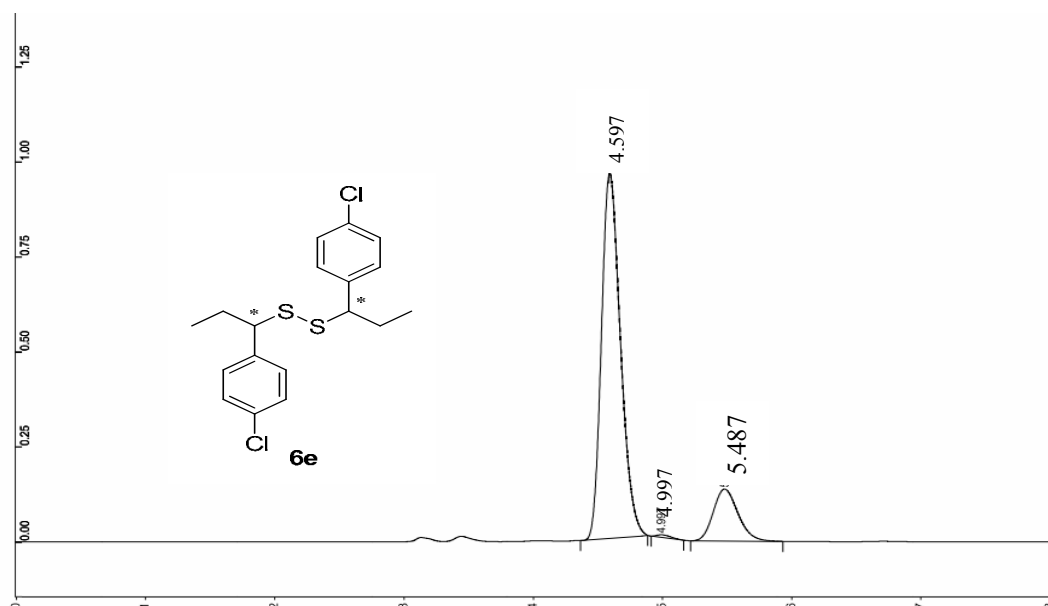

| Peak No. | Peak Name | Result ( ) | Ret. Time (min) | Time Offset (min) | Area (counts) | Sep. Code | Width 1/2 (sec) | Status Codes |
|----------|-----------|------------|-----------------|-------------------|---------------|-----------|-----------------|--------------|
| 1        |           | 84.0209    | 4.597           | 0.000             | 98273008      | BB        | 9.5             |              |
| 2        |           | 0.4391     | 4.997           | 0.000             | 513526        | BB        | 4.5             |              |
| 3        |           | 15.5401    | 5.487           | 0.000             | 18176062      | BB        | 12.3            |              |
| Totals:  |           | 100.0001   |                 | 0.000             | 116962596     |           |                 |              |

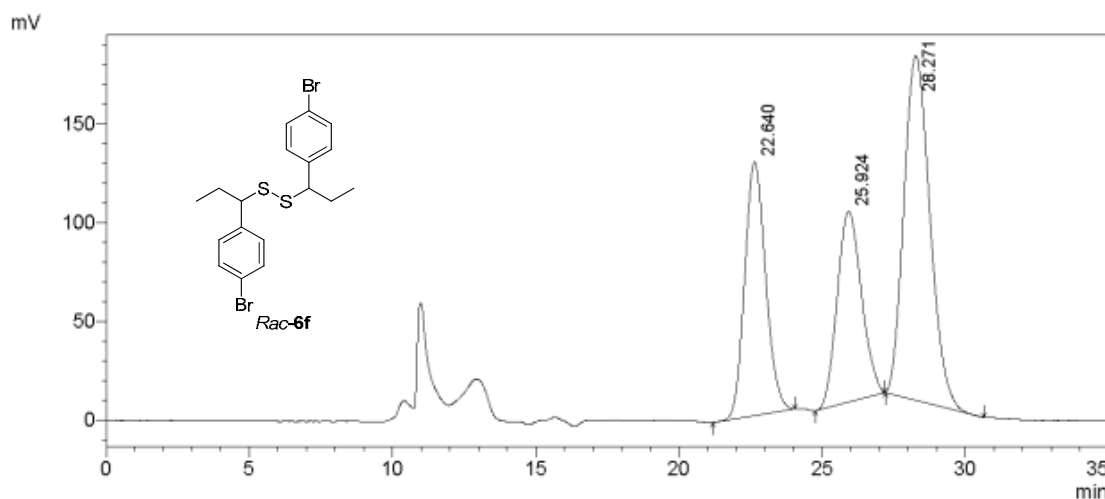

| Peak No. | Ret. Time (min) | Area     | Height | Area % | Height % |
|----------|-----------------|----------|--------|--------|----------|
| 1        | 22.640          | 6542924  | 128512 | 28.050 | 32.131   |
| 2        | 25.924          | 5737532  | 96878  | 24.598 | 24.222   |
| 3        | 28.271          | 11045082 | 175467 | 47.352 | 43.646   |
| Total    |                 | 23325538 | 399956 | 100.00 | 100.00   |

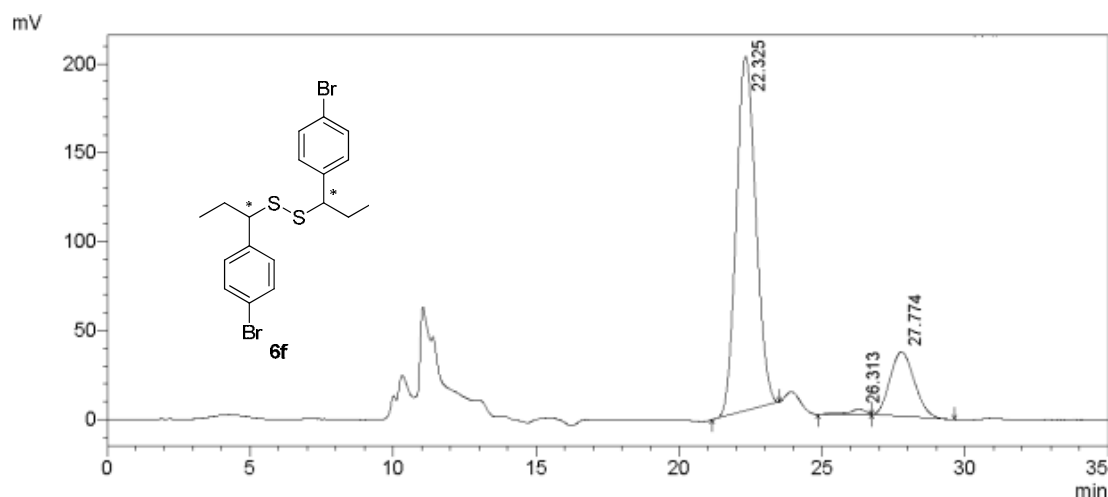

| Peak No. | Ret. Time (min) | Area    | Height | Area % | Height % |
|----------|-----------------|---------|--------|--------|----------|
| 1        | 22.325          | 9519307 | 199643 | 80.855 | 83.730   |
| 2        | 26.313          | 123104  | 2704   | 1.046  | 1.134    |

|       |        |          |        |        |        |
|-------|--------|----------|--------|--------|--------|
| 3     | 27.774 | 2130890  | 36090  | 18.099 | 15.136 |
| Total |        | 11773301 | 238436 | 100.00 | 100.00 |

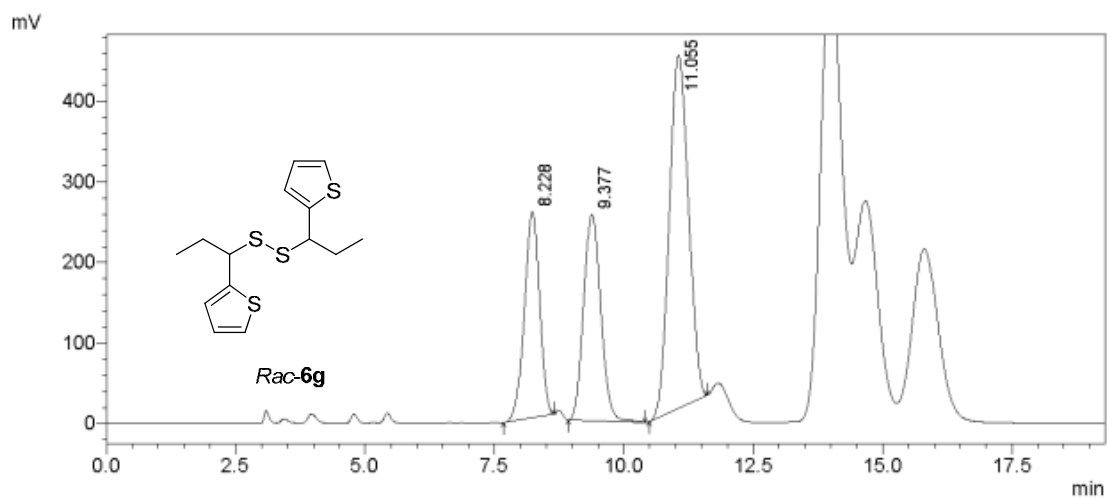

| Peak No. | Ret. Time (min) | Area     | Height | Area % | Height % |
|----------|-----------------|----------|--------|--------|----------|
| 1        | 8.228           | 5263386  | 255507 | 23.348 | 26.909   |
| 2        | 9.377           | 5912544  | 256025 | 26.227 | 26.964   |
| 3        | 11.055          | 11367672 | 437981 | 50.425 | 46.127   |
| Total    |                 | 22543602 | 949513 | 100.00 | 100.00   |

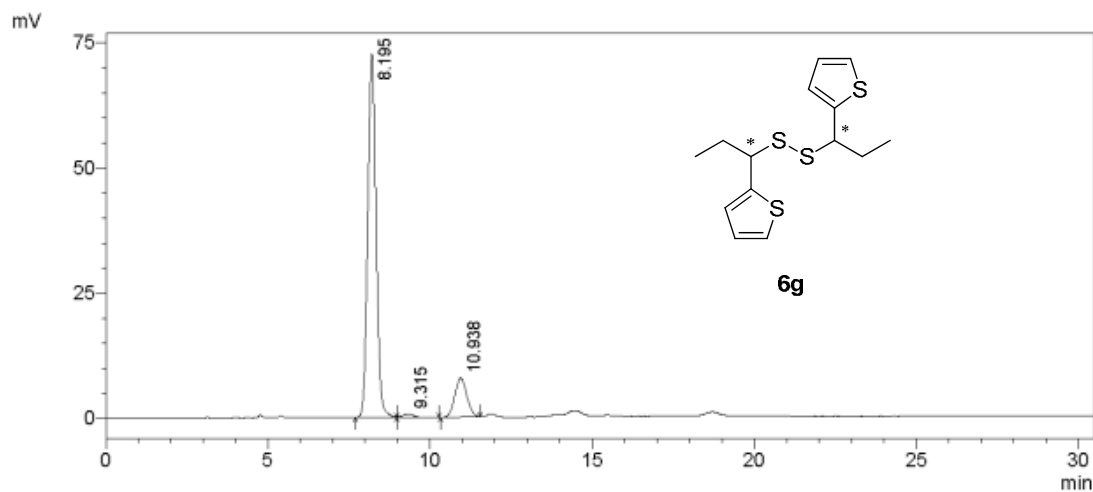

| Peak No. | Ret. Time (min) | Area    | Height | Area % | Height % |
|----------|-----------------|---------|--------|--------|----------|
| 1        | 8.195           | 1295289 | 72506  | 85.682 | 89.563   |
| 2        | 9.315           | 16403   | 688    | 1.085  | 0.849    |
| 3        | 10.938          | 200049  | 7761   | 13.233 | 9.587    |
| Total    |                 | 1511741 | 80955  | 100.00 | 100.00   |

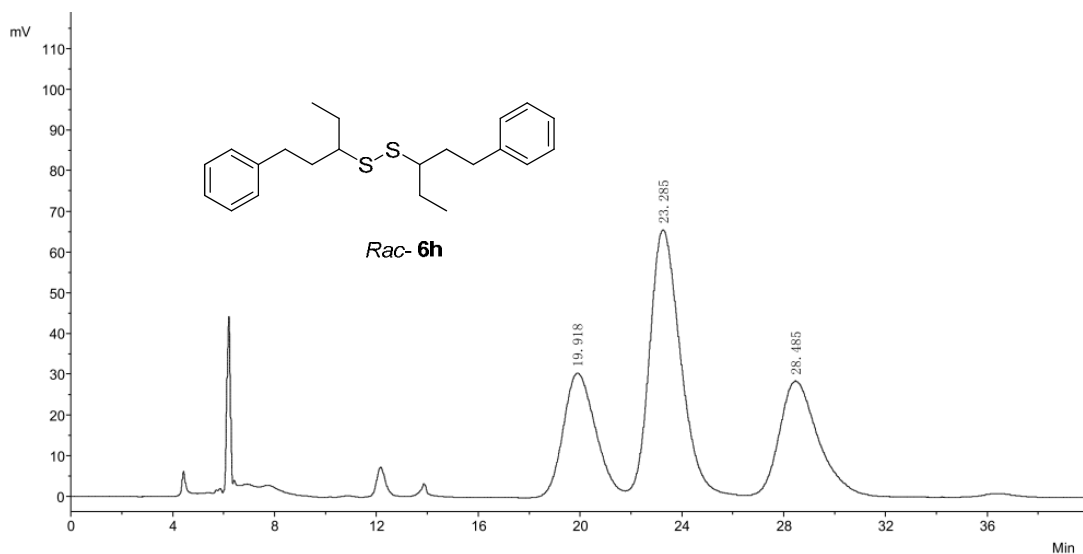

| No.   | PeakNo | ID. Name | R. Time | PeakHeight | PeakArea   | PerCent  |
|-------|--------|----------|---------|------------|------------|----------|
| 1     | 1      |          | 19.918  | 30512.3    | 2685604.5  | 24.0918  |
| 2     | 2      |          | 23.285  | 65460.6    | 5498902.9  | 49.3291  |
| 3     | 3      |          | 28.485  | 28183.7    | 2962882.9  | 26.5792  |
| Total |        |          |         | 124156.6   | 11147390.4 | 100.0000 |

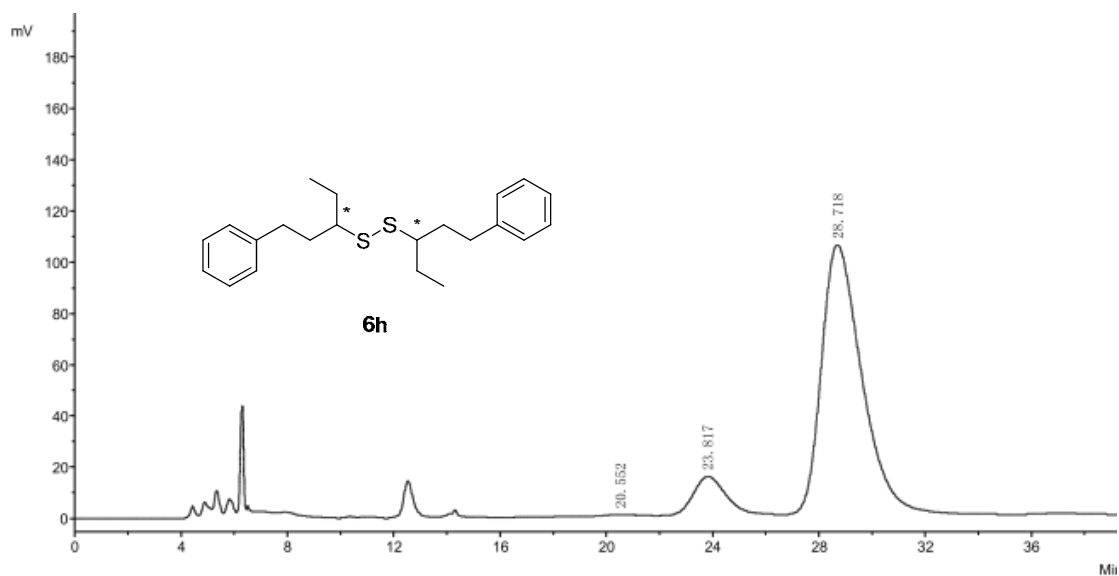

| No.   | PeakNo | ID. Name | R. Time | PeakHeight | PeakArea   | PerCent  |
|-------|--------|----------|---------|------------|------------|----------|
| 1     | 1      |          | 20.552  | 661.8      | 50011.3    | 0.4038   |
| 2     | 2      |          | 23.817  | 14975.6    | 1274107.8  | 10.2886  |
| 3     | 3      |          | 28.718  | 105135.6   | 11059570.4 | 89.3076  |
| Total |        |          |         | 120772.9   | 12383689.5 | 100.0000 |

150

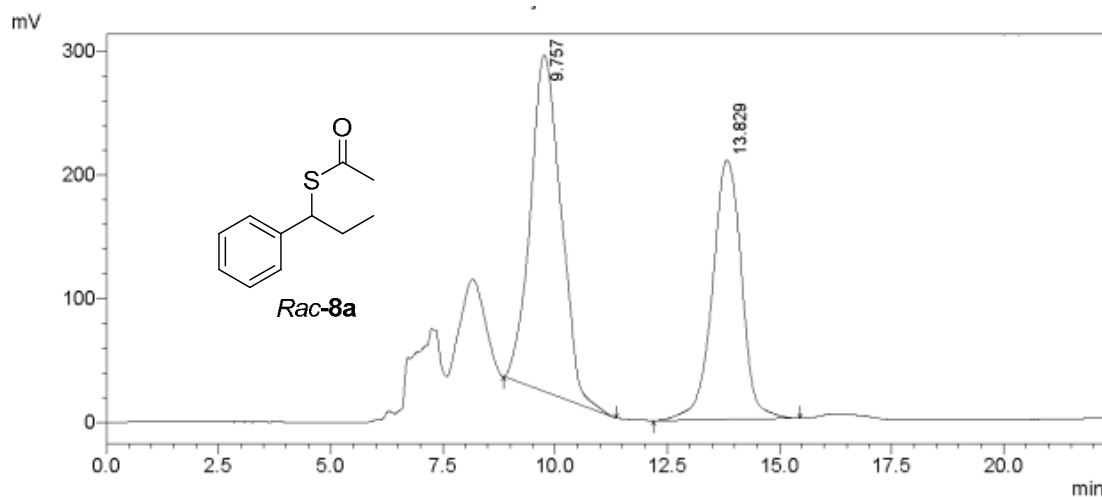

| Peak No. | Ret. Time (min) | Area     | Height | Area % | Height % |
|----------|-----------------|----------|--------|--------|----------|
| 1        | 9.757           | 12919675 | 271984 | 57.624 | 56.441   |
| 2        | 13.829          | 9501091  | 209905 | 42.376 | 43.559   |
| Total    |                 | 22420767 | 481889 | 100.00 | 100.00   |

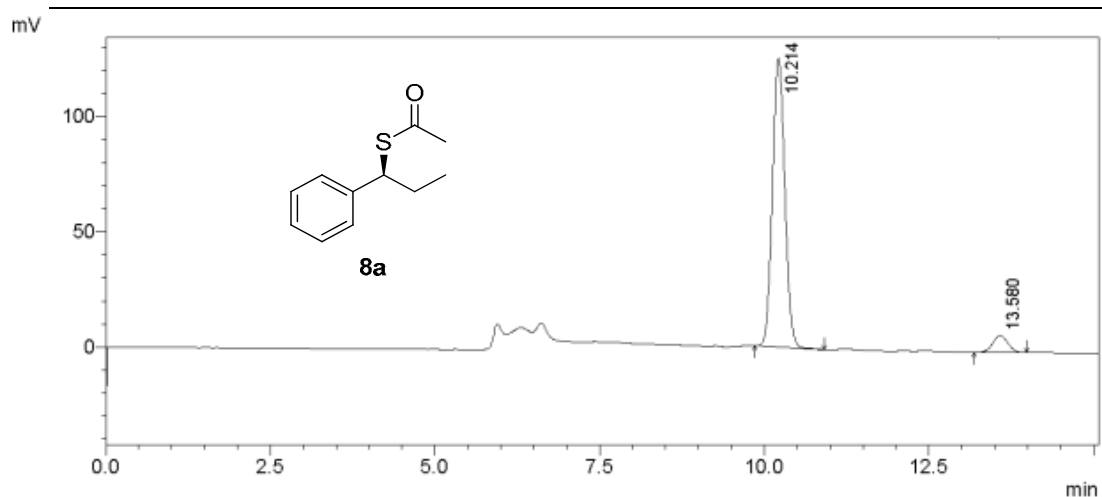

| Peak No. | Ret. Time (min) | Area    | Height | Area % | Height % |
|----------|-----------------|---------|--------|--------|----------|
| 1        | 10.214          | 1626951 | 125332 | 93.294 | 94.515   |
| 2        | 13.580          | 116950  | 7273   | 6.706  | 5.485    |
| Total    |                 | 1743901 | 132604 | 100.00 | 100.00   |
